# Supplementary material for: Anti-SARS-CoV-2 Activity and Cytotoxicity of Amaryllidaceae Alkaloids from Hymenocallis littoralis
Source: MDPI journal article supplement (doi:10.3390/molecules28073222), 2023-04-04
Supplement: s1 [file s1]

## SUPPORTING INFORMATION

# Anti-SARS-CoV-2 Activity and Cytotoxicity of Amaryllidaceae Alkaloids from *Hymenocallis littoralis*

Ngoc-Thao-Hien Le<sup>1\*</sup>, Steven De Jonghe<sup>2</sup>, Kristien Erven<sup>2</sup>, Tom Vermeyen<sup>3,4</sup>, Aliou M. Baldé<sup>5</sup>, Wouter A. Herrebout<sup>3</sup>, Johan Neyts<sup>2</sup>, Christophe Pannecouque<sup>2</sup>, Luc Pieters<sup>1</sup>, Emmy Tuenter<sup>1</sup>

<sup>1</sup>Natural Products & Food Research and Analysis (NatuRA), Department of Pharmaceutical Sciences, University of Antwerp, Universiteitsplein 1, 2610 Antwerp, Belgium.

<sup>2</sup>KU Leuven, Department of Microbiology, Immunology and Transplantation, Rega Institute for Medical Research, Laboratory of Virology and Chemotherapy, Herestraat 49, postbus 1043, B-3000 Leuven, Belgium

<sup>3</sup>Molecular Spectroscopy (MolSpec), Department of Chemistry, University of Antwerp, Groenenborgerlaan 171, 2020 Antwerp, Belgium

<sup>4</sup>Ghent Quantum Chemistry Group, Department of Chemistry, Ghent University, Krijgslaan 281, B-9000 Ghent, Belgium

<sup>5</sup>Department of Pharmacy, University Gamal Abdel Nasser of Conakry, Guinea

\*[lengocthaohien@gmail.com](mailto:lengocthaohien@gmail.com) or [ngocthaohien.le@uantwerpen.be](mailto:ngocthaohien.le@uantwerpen.be)

## TABLE OF CONTENTS

|                                                                                                                               |     |
|-------------------------------------------------------------------------------------------------------------------------------|-----|
| 1. NMR data of compounds 6-11 .....                                                                                           | 3   |
| 2. HRMS and NMR spectra of compound <b>1</b> in CD <sub>3</sub> OD .....                                                      | 6   |
| 3. HRMS and NMR spectra of compounds <b>2</b> and <b>3</b> in CD <sub>3</sub> OD and (CD <sub>3</sub> ) <sub>2</sub> SO ..... | 10  |
| 4. DP4+ probability results .....                                                                                             | 17  |
| 5. VCD spectrum of compounds <b>2</b> and <b>3</b> .....                                                                      | 105 |
| 6. Anti-SARS-CoV-2 activity and cytotoxicity .....                                                                            | 106 |

## 1. NMR data of compounds 6-11

### *Lycorine (6)*

White crystals (1 g); UV  $\lambda_{\max}$  205, 240, 290 nm;  $^1\text{H}$  and  $^{13}\text{C}$  NMR in  $(\text{CD}_3)_2\text{SO}$  (400 and 100 MHz):  $\delta_{\text{H}}$  6.80 (s, H-10), 6.67 (s, H-7), 5.95 (s, H-13a), 5.94 (s, H-13b), ( 5.39 (brs, H-3), 4.87 (d, 6.26, 2-OH), 4.76 (d, 4.27, 1-OH), 4.24 (brs, H-1), 4.02 (d, 14.3, H-6 $\alpha$ ), 3.97 (brs, H-2), 3.32 (d, 14.3, H-6 $\beta$ ), 3.20 (t, 8.3, H-12 $\alpha$ ), 2.60 (d, 10.3, H-4a), 2.50 (overlapped, H-10b), 2.45-2.49 (overlapped, H-11, 2H), 2.20 (q, 8.3, H-12 $\beta$ );  $\delta_{\text{C}}$  145.0 (C-9), 144.7 (C-8), 141.1 (C-4), 129.1 (C-6a), 128.9 (C-10a), 117.9 (C-3), 106.5 (C-7), 104.5 (C-10), 71.2 (C-2), 69.6 (C-1), 60.2 (C-4a), 56.1 (C-6), 52.7 (C-12), 39.6 (C-10b), 27.6 (C-11); Positive HRESIMS  $m/z$  288.1238  $[\text{M}+\text{H}]^+$  (calcd for  $\text{C}_{16}\text{H}_{18}\text{NO}_4$ , 288.1236)

### *2-Epi-lycorine (7)*

White powder (1.5 mg); UV  $\lambda_{\max}$  205, 254, 290 nm;  $[\alpha]_{\text{D}}^{25}$   $-6.5$  ( $c$  0.2, MeOH);  $^1\text{H}$  and  $^{13}\text{C}$  NMR in  $(\text{CD}_3)_2\text{SO}$  (400 and 100 MHz):  $\delta_{\text{H}}$  6.80 (s, H-10), 6.67 (s, H-7), 5.95 (s, H-13a), 5.94 (s, H-13b), 5.39 (brs, H-3), 4.87 (d, 6.26, 2-OH), 4.76 (d, 4.27, 1-OH), 4.24 (brs, H-1), 4.02 (d, 14.3, H-6 $\alpha$ ), 3.97 (brs, H-2), 3.32 (d, 14.3, H-6 $\beta$ ), 3.20 (t, 8.3, H-12 $\alpha$ ), 2.60 (d, 10.3, H-4a), 2.50 (overlapped, H-10b), 2.45-2.49 (overlapped, H-11, 2H), 2.20 (q, 8.3, H-12 $\beta$ );  $\delta_{\text{C}}$  145.0 (C-9), 144.7 (C-8), 141.1 (C-4), 129.1 (C-6a), 128.9 (C-10a), 117.9 (C-3), 106.5 (C-7), 104.5 (C-10), 71.2 (C-2), 69.6 (C-1), 60.2 (C-4a), 56.1 (C-6), 52.7 (C-12), 39.6 (C-10b), 27.6 (C-11); Positive HRESIMS  $m/z$  288.1232  $[\text{M}+\text{H}]^+$  (calcd for  $\text{C}_{16}\text{H}_{18}\text{NO}_4$ , 288.1236)

### *Zephyranthine (8)*

White powder (3 mg); UV  $\lambda_{\max}$  210, 254 nm;  $[\alpha]_{\text{D}}^{25}$   $-14.6$  ( $c$  0.8, MeOH);  $^1\text{H}$  and  $^{13}\text{C}$  NMR in  $\text{CD}_3\text{OD}$  (400 and 100 MHz):  $\delta_{\text{H}}$  6.97 (s, H-10), 6.65 (s, H-7), 5.90 (d, 1.1, H-13a), 5.89 (d, 1.1, H-13b), 4.50 (brs, H-1), 4.15 (H-6 $\alpha$ ), 3.89 (m, H-2), 3.72 (H-6 $\beta$ ), 3.26 (H-12 $\alpha$ ), 3.07 (H-4a),

2.87 (H-12 $\beta$ ), 2.56 (H-10b), 2.53 (H-4), 2.09 (H-3 $\alpha$ ), 1.93 (overlapped, H-11, 2H), 1.86 (H-3 $\beta$ );  $\delta_C$  148.1 (C-8), 147.2 (C-9), 132.4 (C-6a), 128.7 (C-10a), 107.7 (C-7), 106.2 (C-10), 102.0 (C-13), 69.9 (C-1), 69.6 (C-2), 60.0 (C-4a), 54.9 (C-12), 54.1 (C-6), 38.4 (C-4), 37.0 (C-10b), 29.6 (C-3), 28.1 (C-11); Positive HRESIMS  $m/z$  290.1389 [M+H]<sup>+</sup> (calcd for C<sub>16</sub>H<sub>18</sub>NO<sub>4</sub>, 290.1392)

*Ungeremine (9)*

White powder (1.5 mg); UV  $\lambda_{\max}$  254, 365 nm;  $[\alpha]_D^{25}$  -1.8 (*c* 0.2, MeOH); <sup>1</sup>H and <sup>13</sup>C NMR in (CD<sub>3</sub>)<sub>2</sub>SO (400 and 100 MHz):  $\delta_H$  8.92 (brs, H-6), 7.93 (s, H-10), 7.53 (s, H-7), 7.22 (d, 1.5, H-1), 7.10 (d, 1.5, H-3), 6.31 (s, H-13, 2H), 5.11 (t, 7.0, H-12, 2H), 3.64 (t, 7.0, H-11, 2H); Positive HRESIMS  $m/z$  266.0816 [M+H]<sup>+</sup> (calcd for C<sub>16</sub>H<sub>18</sub>NO<sub>4</sub>, 266.1817)

*Pancratistatin (10)*

Brownish crystals (18 mg); UV  $\lambda_{\max}$  210, 254 nm;  $[\alpha]_D^{25}$  -1.5 (*c* 0.2, MeOH); <sup>1</sup>H and <sup>13</sup>C NMR in (CD<sub>3</sub>)<sub>2</sub>SO (400 and 100 MHz):  $\delta_H$  13.07 (s, 7-OH phenol), 7.50 (s, N-H), 6.49 (s, H-10), 6.06 (d, 0.9, H-11a), 6.04 (d, 0.9, H-11b), 5.35 (d, 3.97, 3-OH), 5.08 (d, 6.00, 2-OH), 4.82 (d, 7.77, 1-OH), 4.28 (m, H-1), 3.96 (m, H-3), 3.85 (m, H-2), 3.73 (m, H-4), 3.71 (m, H-4a), 2.97 (dd; 11.9, 1.4; H-10b);  $\delta_C$  169.5 (C-6), 152.1 (C-9), 145.4 (C-7), 135.7 (C-10a), 131.7 (C-8), 107.5 (C-6a), 101.5 (C-11), 97.5 (C-10), 73.1 (C-2), 69.9 (C-3), 68.2 (C-1), 50.3 (C-4a), 39.5 (C-10b); Positive HRESIMS  $m/z$  326.0873 [M+H]<sup>+</sup> (calcd for C<sub>16</sub>H<sub>18</sub>NO<sub>4</sub>, 326.0876)

*9-O-Demethyl-7-O-methyllycorenine (11)*

Yellowish amorphous powder (6 mg); UV  $\lambda_{\max}$  205, 230, 280 nm;  $[\alpha]_D^{25}$  126.7 (*c* 0.5, MeOH); <sup>1</sup>H and <sup>13</sup>C NMR in (CD<sub>3</sub>)<sub>2</sub>SO (400 and 100 MHz):  $\delta_H$  6.95 (s, H-11), 6.75 (s, H-8), 5.64 (m, H-4), 5.46 (s, H-7), 4.26 (dd; 6.0, 1.7; H-5a), 3.88 (s, 13-OMe), 3.50 (s, 7-OMe), 3.22 (m, H-2), 2.88 (d, 9.6, H-11c), 2.65 (m, H-5), 2.46 (dd; 9.8, 1.8; H-11b), 2.38 (t, H-2), 2.31 (m, H-5),

2.14 (s, N-Me);  $\delta_{\text{C}}$  147.4 (C-10), 146.6 (C-9), 140.4 (C-3a), 128.5 (C-7a), 126.2 (C-11a), 116.8 (C-4), 114.1 (C-8), 98.1 (C-7), 67.9 (C-11c), 66.7 (C-5a), 56.0 (C-2), 55.3 (13-OMe), 54.1 (7-OMe), 43.2 (C-11b), 42.7 (N-Me), 31.1 (C-5), 28.6 (C-3); Positive HRESIMS  $m/z$  318.1705  $[\text{M}+\text{H}]^+$  (calcd for  $\text{C}_{16}\text{H}_{18}\text{NO}_4$ , 318.1705)

## 2. HRMS and NMR spectra of compound **1** in CD<sub>3</sub>OD

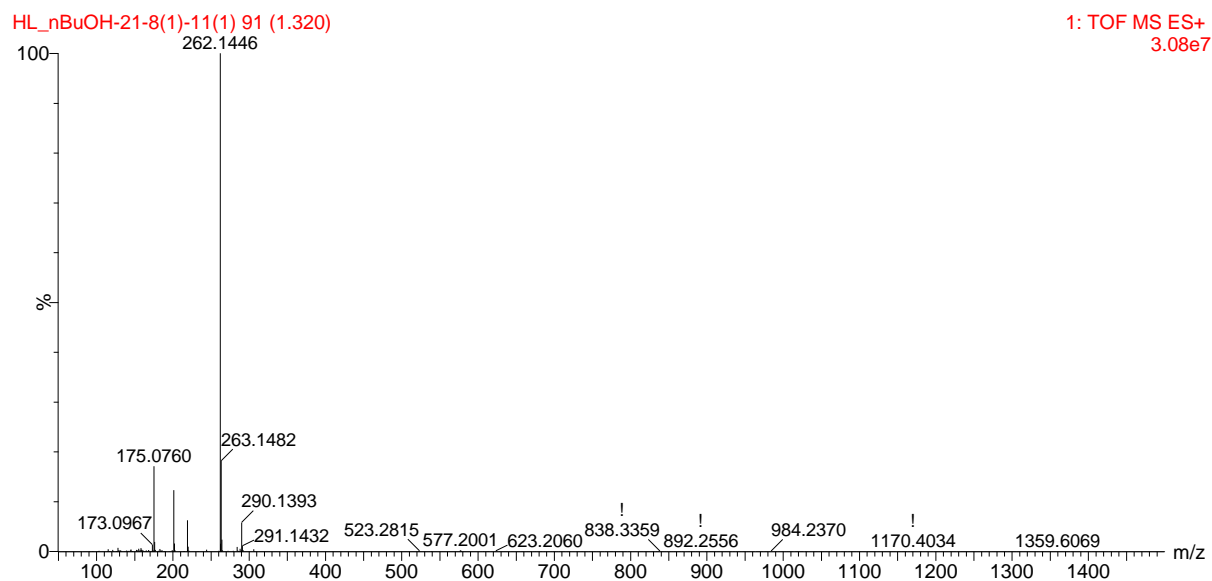

Figure S1. HRMS spectrum of compound **1**

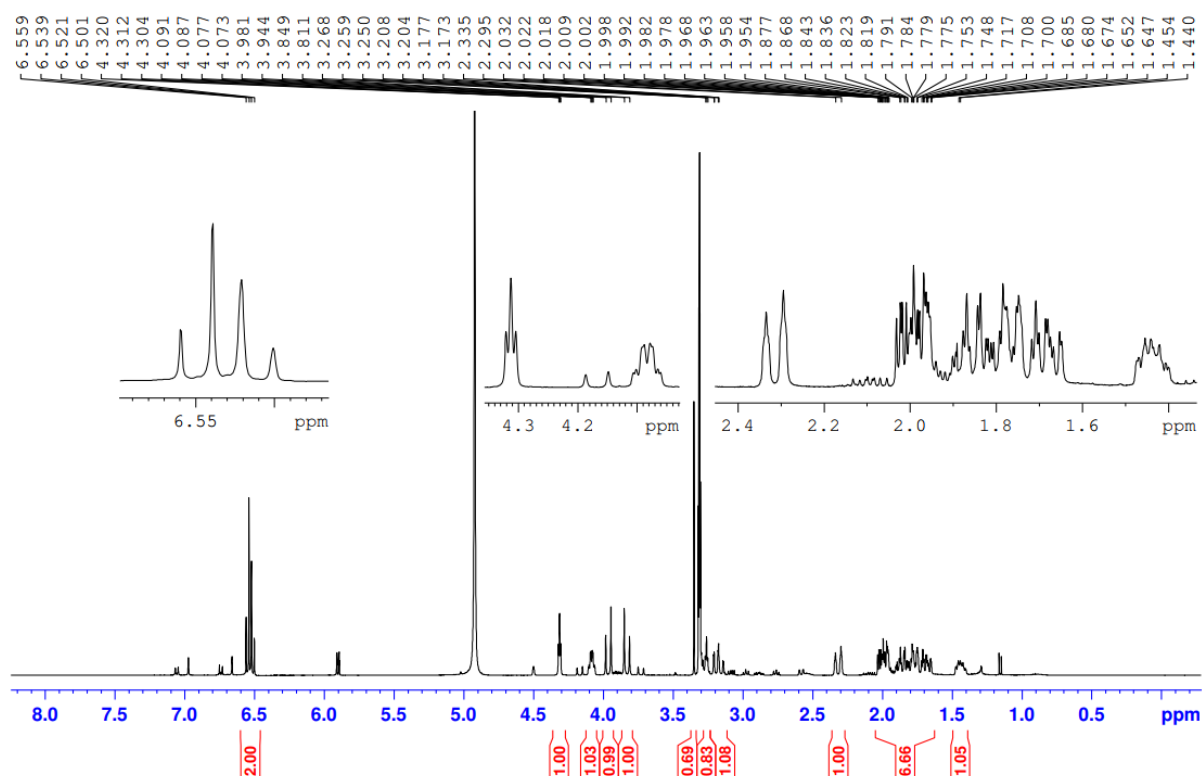

Figure S2. <sup>1</sup>H spectrum of compound **1** in CD<sub>3</sub>OD

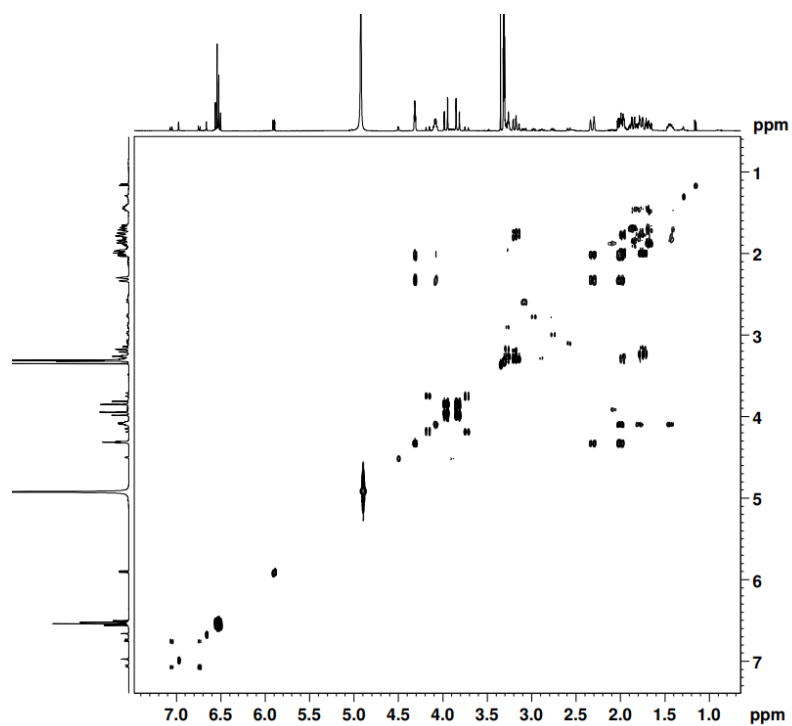

Figure S3. COSY spectrum of compound **1** in CD<sub>3</sub>OD

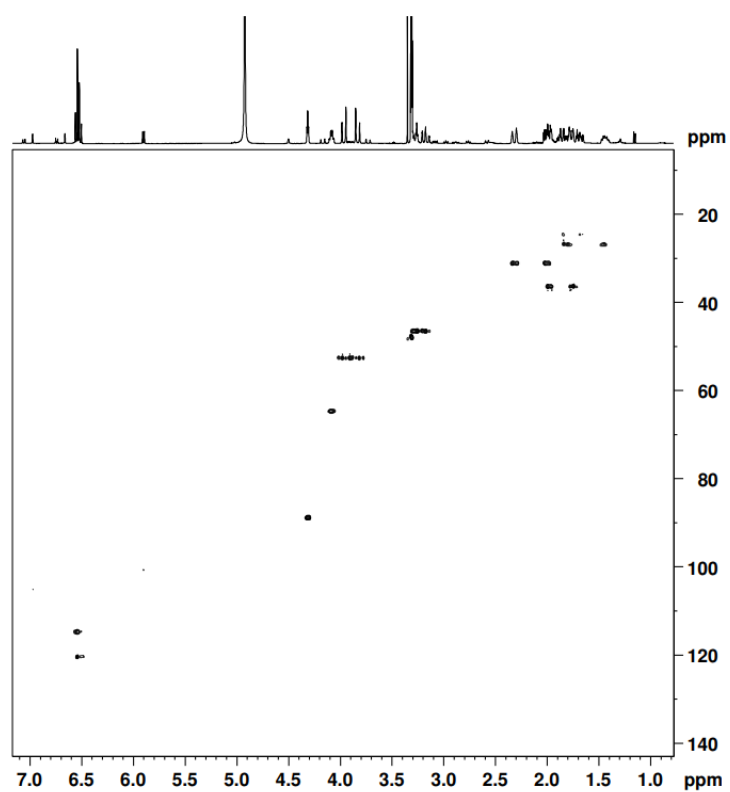

Figure S4. HSQC spectrum of compound **1** in CD<sub>3</sub>OD

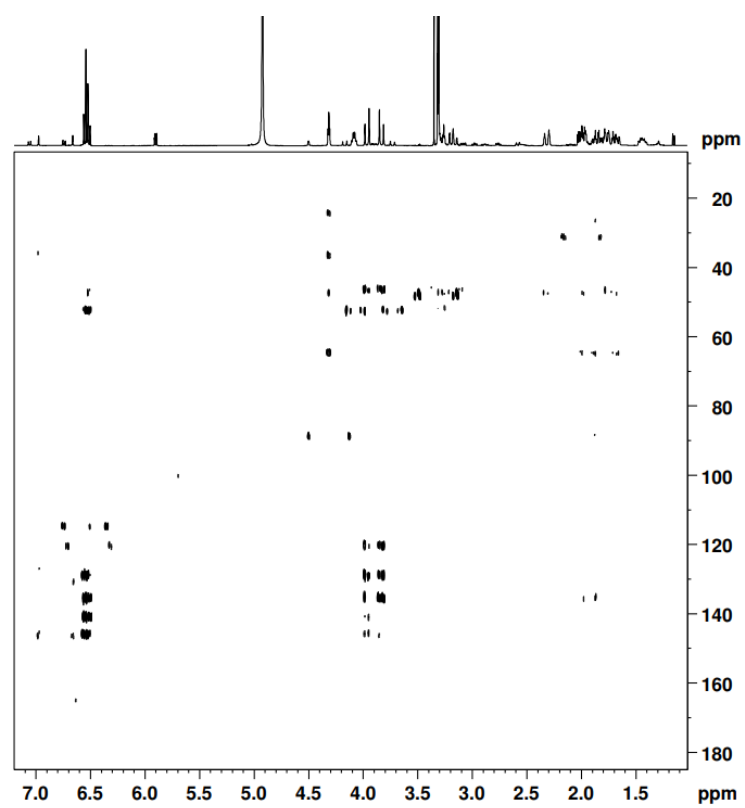

Figure S5. HMBC spectrum of compound **1** in CD<sub>3</sub>OD



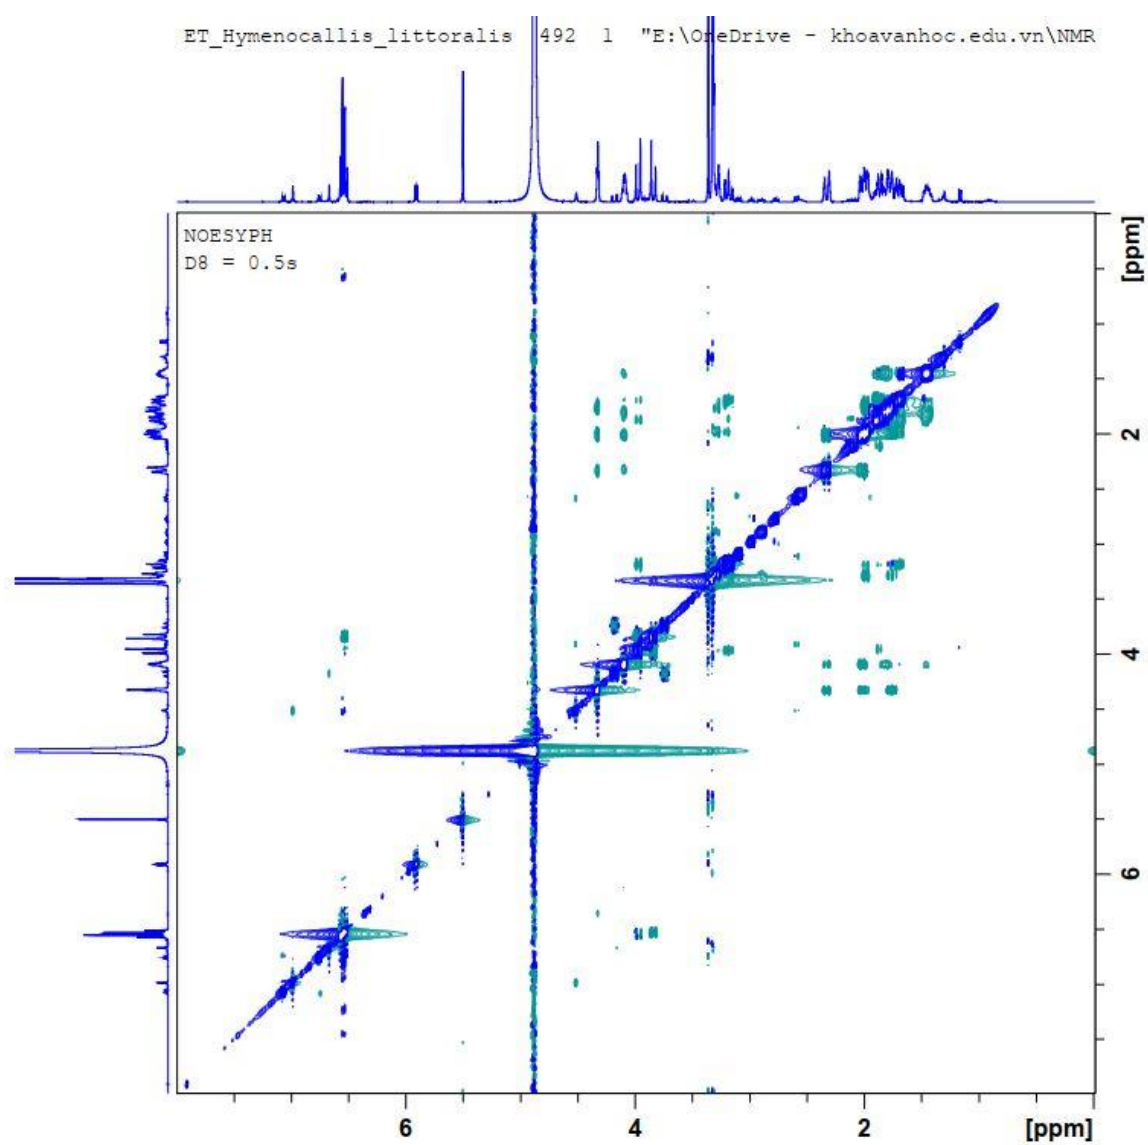

Figure S6. NOESY spectrum of compound **1** in CD<sub>3</sub>OD

### 3. HRMS and NMR spectra of compounds **2** and **3** in CD<sub>3</sub>OD and (CD<sub>3</sub>)<sub>2</sub>SO

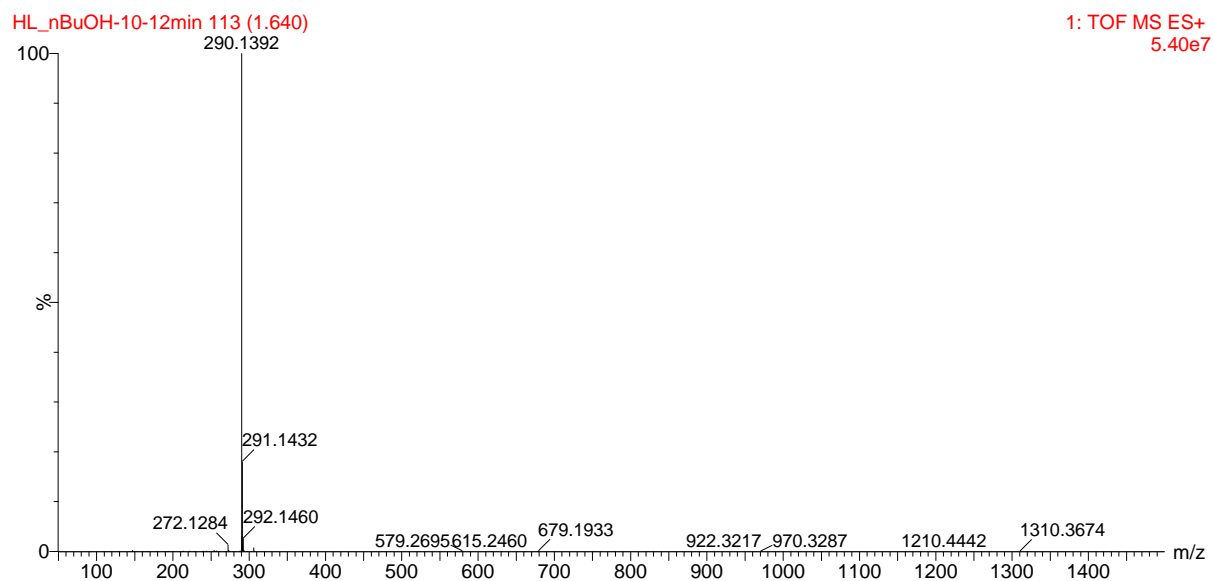

Figure S7. HRMS spectrum of compounds **2** and **3**

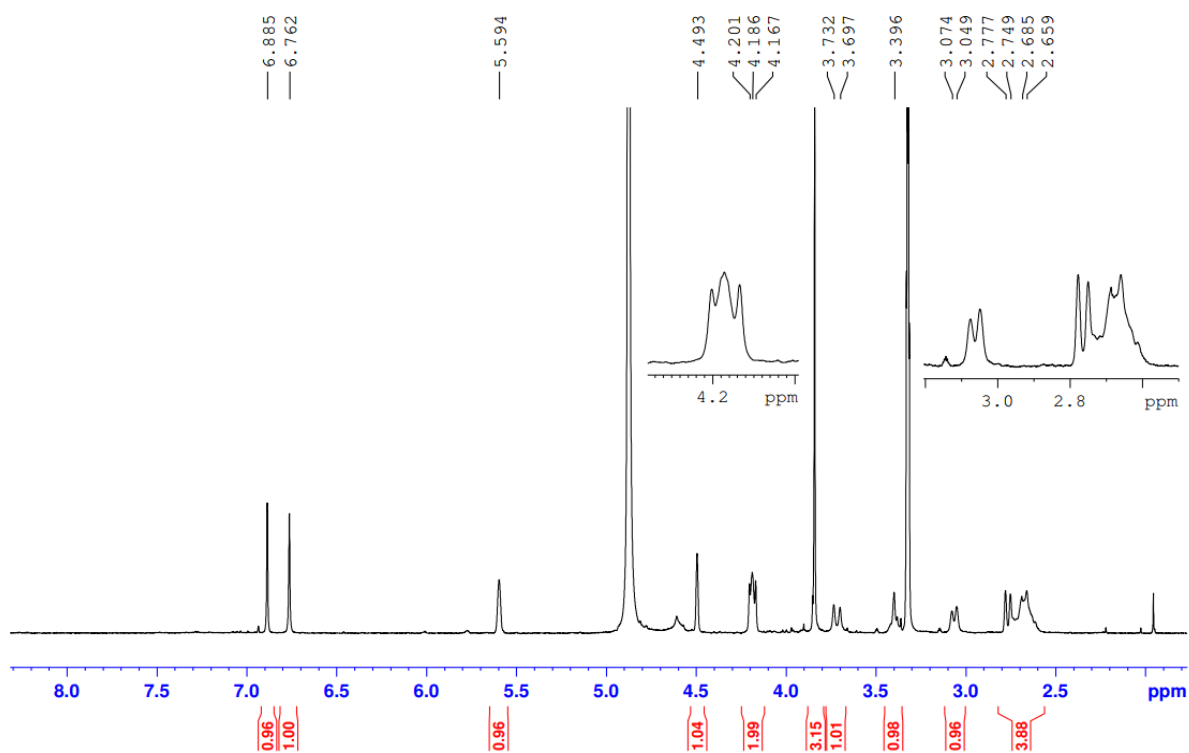

Figure S8. <sup>1</sup>H spectrum of compounds **2** and **3** in CD<sub>3</sub>OD

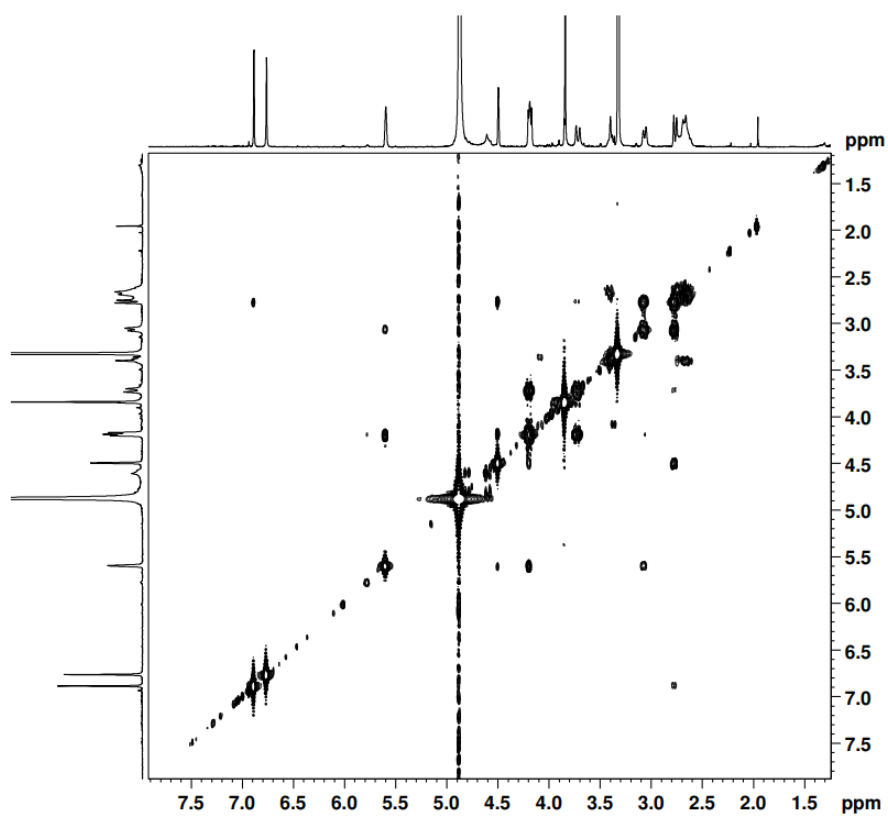

Figure S9. COSY spectrum of compounds **2** and **3** in CD<sub>3</sub>OD

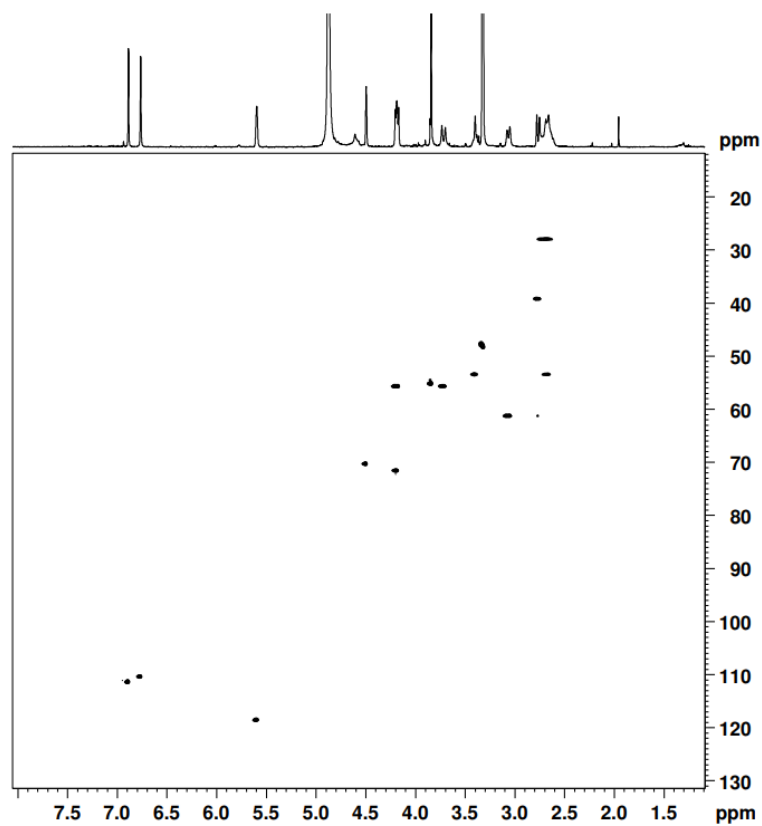

Figure S10. HSQC spectrum of compounds **2** and **3** in CD<sub>3</sub>OD

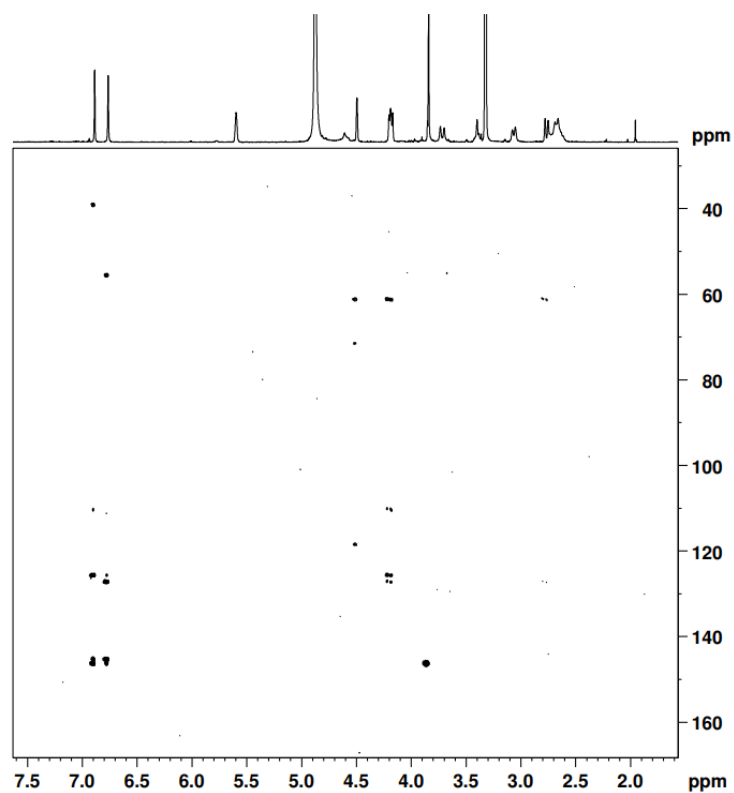

Figure S11. HMBC spectrum of compounds **2** and **3** in CD<sub>3</sub>OD

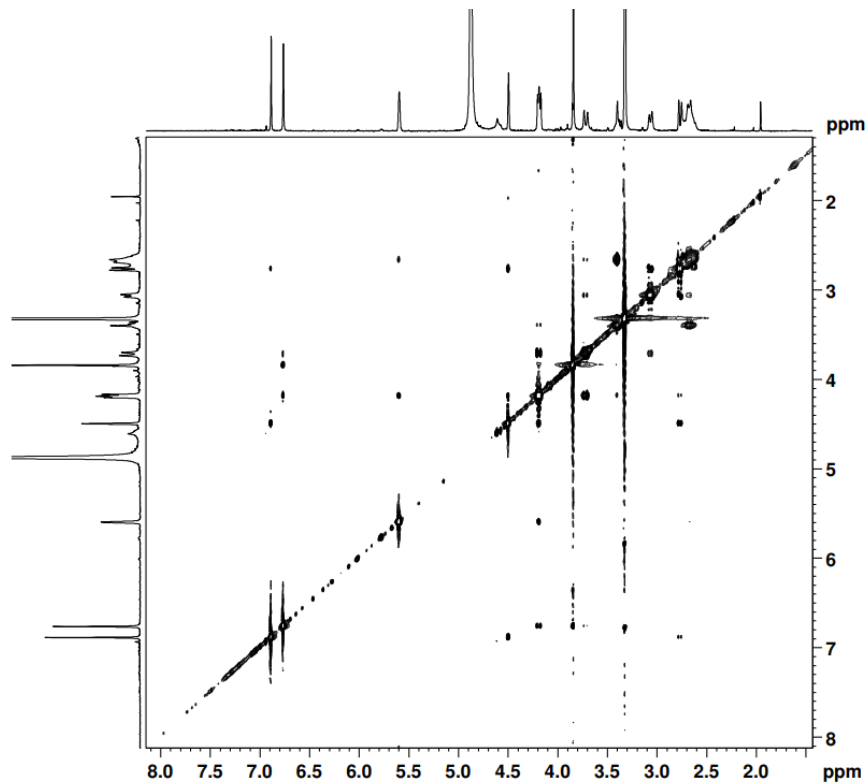

Figure S12. NOESY spectrum of compounds **2** and **3** in CD<sub>3</sub>OD

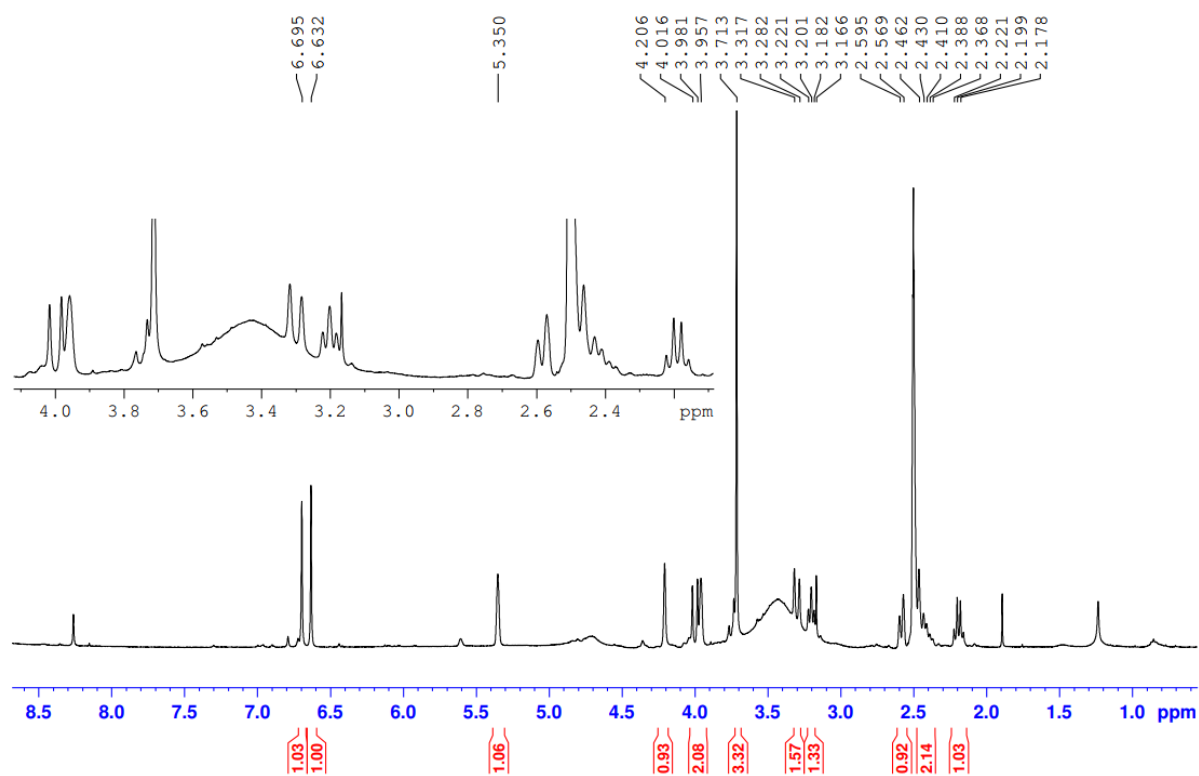

Figure S13. <sup>1</sup>H spectrum of compounds **2** and **3** in (CD<sub>3</sub>)<sub>2</sub>SO

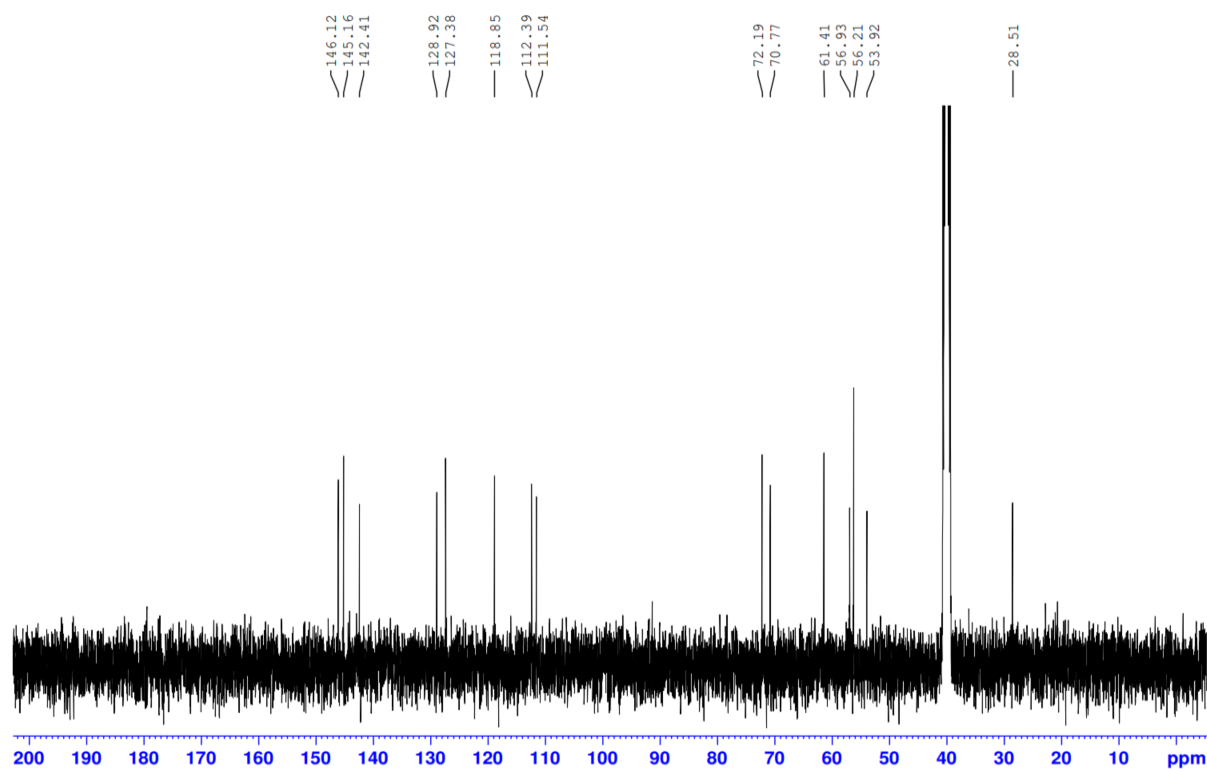

Figure S14. <sup>13</sup>C spectrum of compounds **2** and **3** in (CD<sub>3</sub>)<sub>2</sub>SO

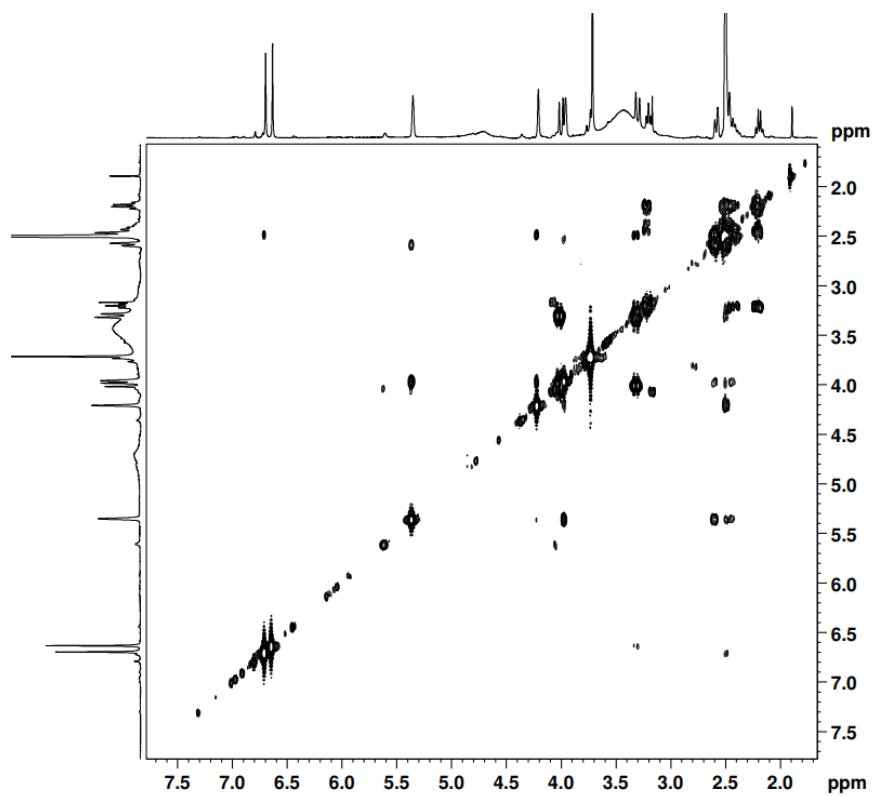

Figure S15. COSY spectrum of compounds **2** and **3** in  $(\text{CD}_3)_2\text{SO}$

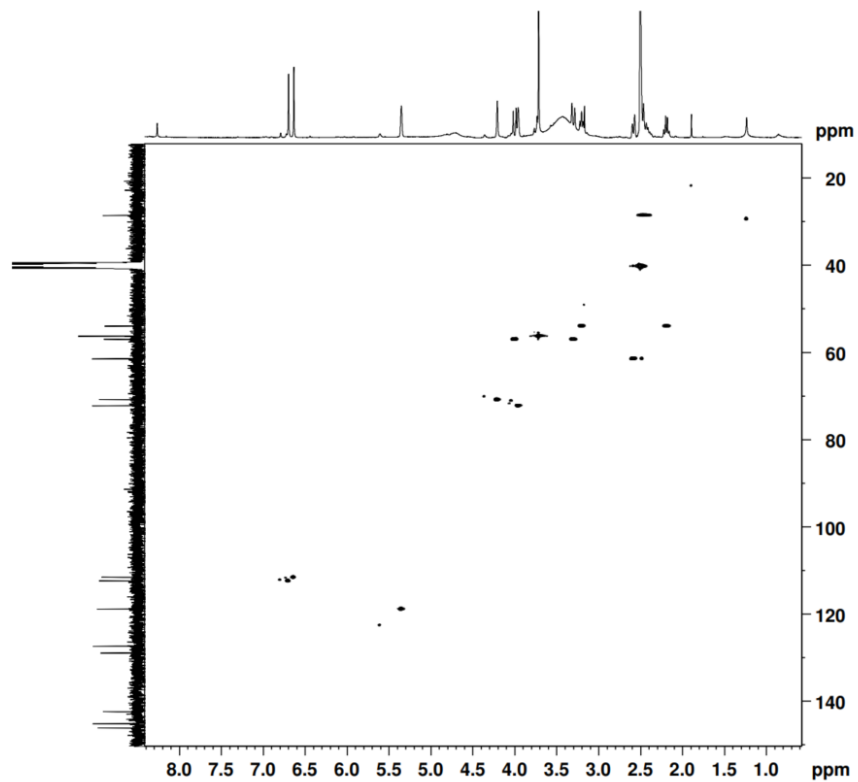

Figure S16. HSQC spectrum of compounds **2** and **3** in  $(\text{CD}_3)_2\text{SO}$

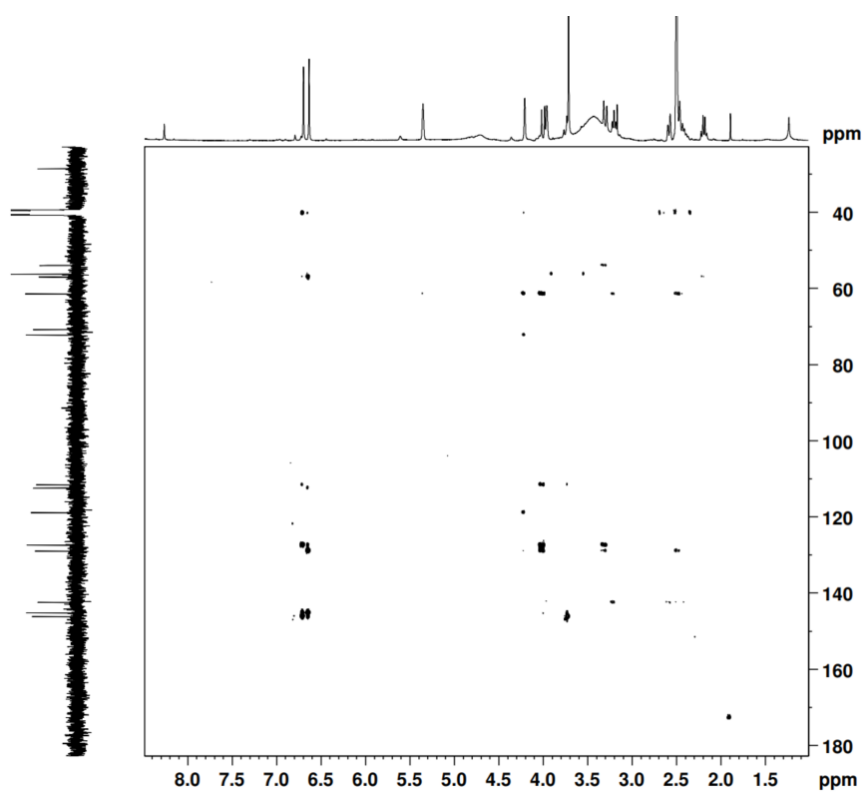

Figure S17. HMBC spectrum of compounds **2** and **3** in  $(\text{CD}_3)_2\text{SO}$

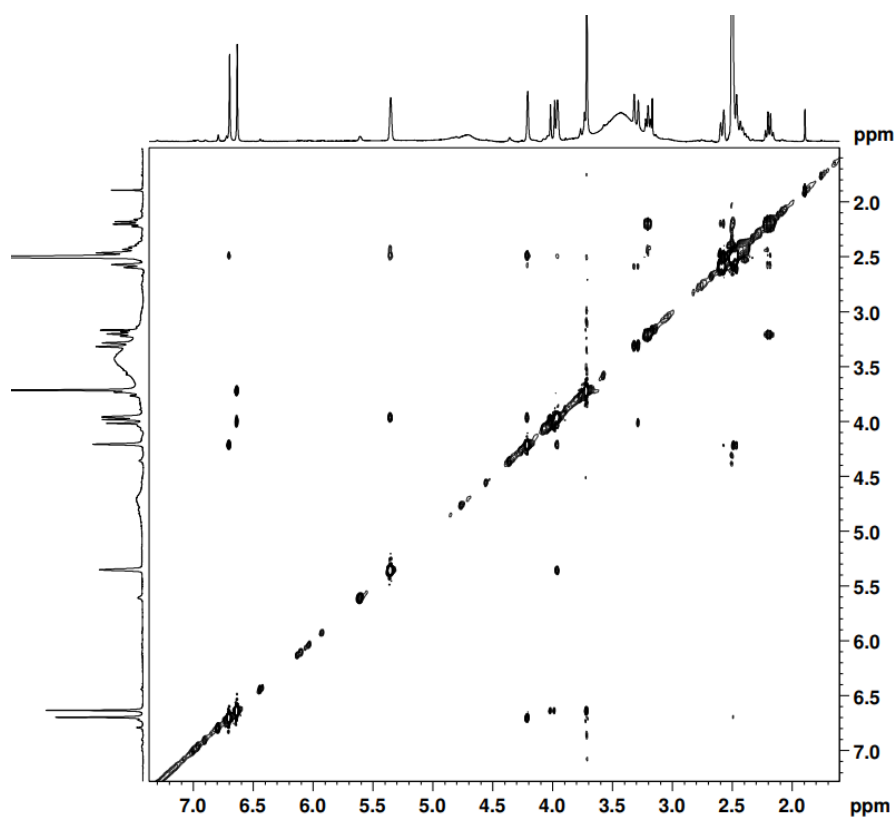

Figure S18. NOESY spectrum of compounds **2** and **3** in  $(\text{CD}_3)_2\text{SO}$

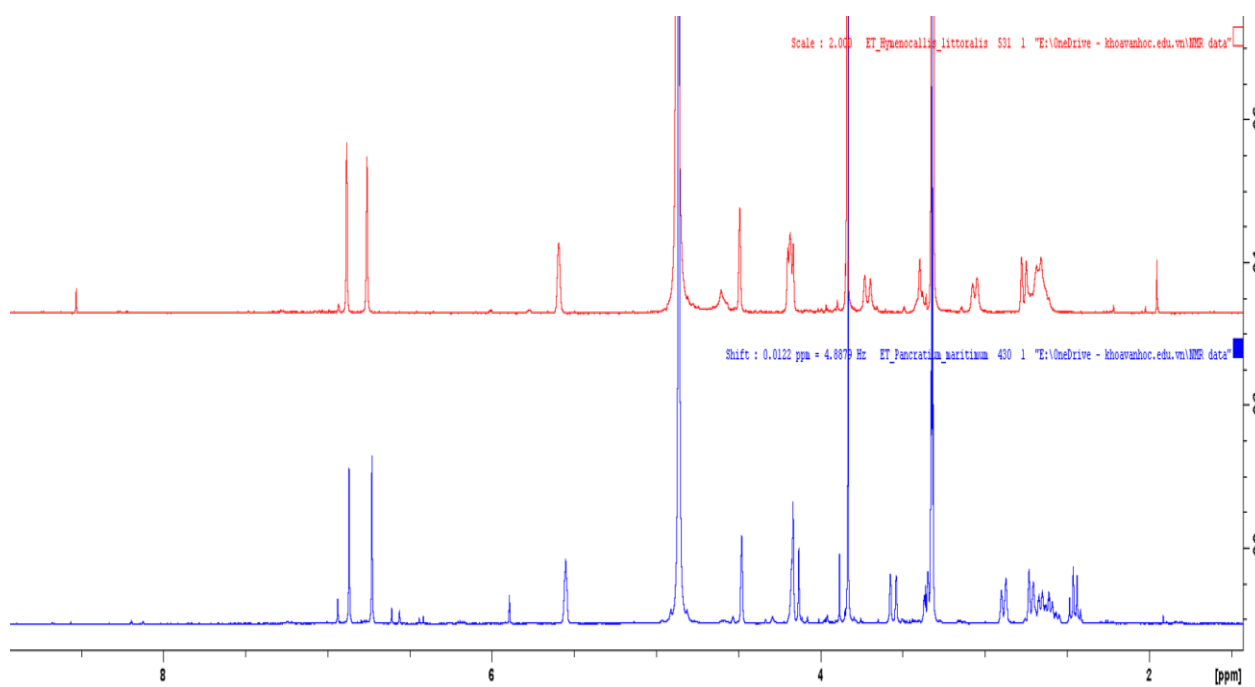

Figure S19.  $^1\text{H}$  spectra of compounds **2** and **3** (in red) and pseudolycorine (in blue) in  $\text{CD}_3\text{OD}$

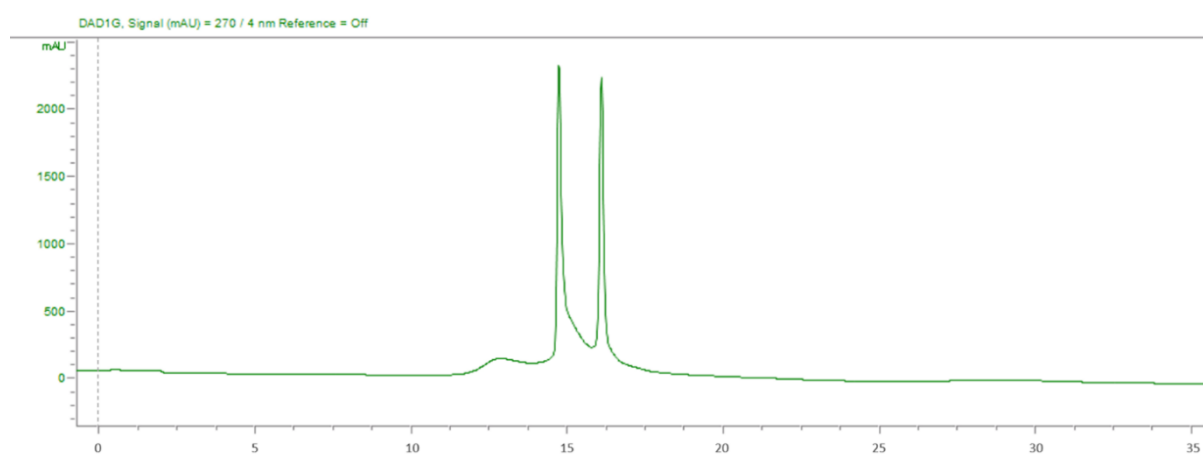

Figure S20. HPLC-UV chromatogram (270 nm) of compounds **2** and **3** after enantioseparation



#### 4. DP4+ probability results

| Functional<br>mPW1PW91 | Solvent?<br>PCM | Basis Set<br>6-311+G(d,p) |          |          |          | Type of Data<br>Shielding Tensors |  |
|------------------------|-----------------|---------------------------|----------|----------|----------|-----------------------------------|--|
|                        | Isomer 1        | Isomer 2                  | Isomer 3 | Isomer 4 | Isomer 5 | Isomer 6                          |  |
| sDP4+ (H data)         | 0.41%           | 0.00%                     | 99.59%   | 0.00%    | -        | -                                 |  |
| sDP4+ (C data)         | 93.96%          | 0.00%                     | 6.04%    | 0.00%    | -        | -                                 |  |
| sDP4+ (all data)       | 6.09%           | 0.00%                     | 93.91%   | 0.00%    | -        | -                                 |  |
| uDP4+ (H data)         | 4.76%           | 0.00%                     | 95.24%   | 0.00%    | -        | -                                 |  |
| uDP4+ (C data)         | 99.12%          | 0.00%                     | 0.88%    | 0.00%    | -        | -                                 |  |
| uDP4+ (all data)       | 84.94%          | 0.00%                     | 15.06%   | 0.00%    | -        | -                                 |  |
| DP4+ (H data)          | 0.02%           | 0.00%                     | 99.98%   | 0.00%    | -        | -                                 |  |
| DP4+ (C data)          | 99.94%          | 0.00%                     | 0.06%    | 0.00%    | -        | -                                 |  |
| DP4+ (all data)        | 26.78%          | 0.00%                     | 73.22%   | 0.00%    | -        | -                                 |  |

Figure S21. DP4+ probability of compound **1** (*O*-Demethyl-norlycoramine)

| Functional<br>mPW1PW91 | Solvent?<br>PCM | Basis Set<br>6-311+G(d,p) |          |          |          | Type of Data<br>Shielding Tensors |          |          |
|------------------------|-----------------|---------------------------|----------|----------|----------|-----------------------------------|----------|----------|
|                        | Isomer 1        | Isomer 2                  | Isomer 3 | Isomer 4 | Isomer 5 | Isomer 6                          | Isomer 7 | Isomer 8 |
| sDP4+ (H data)         | 0.00%           | 98.10%                    | 0.00%    | 0.88%    | 0.69%    | 0.28%                             | 0.00%    | 0.04%    |
| sDP4+ (C data)         | 0.23%           | 0.14%                     | 0.21%    | 0.07%    | 0.00%    | 13.79%                            | 0.05%    | 85.52%   |
| sDP4+ (all data)       | 0.00%           | 64.62%                    | 0.00%    | 0.28%    | 0.00%    | 18.63%                            | 0.00%    | 16.46%   |
| uDP4+ (H data)         | 0.00%           | 68.59%                    | 0.06%    | 0.14%    | 4.46%    | 26.20%                            | 0.05%    | 0.50%    |
| uDP4+ (C data)         | 92.15%          | 0.03%                     | 0.00%    | 0.03%    | 0.03%    | 0.05%                             | 0.00%    | 7.71%    |
| uDP4+ (all data)       | 3.44%           | 27.67%                    | 0.00%    | 0.05%    | 1.63%    | 15.95%                            | 0.00%    | 51.25%   |
| DP4+ (H data)          | 0.00%           | 99.84%                    | 0.00%    | 0.00%    | 0.05%    | 0.11%                             | 0.00%    | 0.00%    |
| DP4+ (C data)          | 3.12%           | 0.00%                     | 0.00%    | 0.00%    | 0.00%    | 0.09%                             | 0.00%    | 96.78%   |
| DP4+ (all data)        | 0.00%           | 61.05%                    | 0.00%    | 0.00%    | 0.00%    | 10.15%                            | 0.00%    | 28.80%   |

Figure S22. DP4+ probability of compounds **2** and **3** ((-)-2-*epi*-pseudolycorine and (+)-2-*epi*-pseudolycorine)

#### 5. Contributing conformers and Boltzmann-weighted population

##### 5.1. Compound **1**

##### 5.1.1. SRR configuration

| Conformer        | Population (%) |
|------------------|----------------|
| SRR_c0.log       | 74.184         |
| SRR-inv-N_c1.log | 7.777          |
| SRR-inv-N_c0.log | 6.251          |
| SRR_c1.log       | 5.046          |
| SRR-inv-N_c2.log | 4.690          |
| SRR-inv-N_c5.log | 2.053          |

Cartesian coordinate of SRR\_c0:

| -----  |        |        |                         |           |           |  |
|--------|--------|--------|-------------------------|-----------|-----------|--|
| Center | Atomic | Atomic | Coordinates (Angstroms) |           |           |  |
| Number | Number | Type   | X                       | Y         | Z         |  |
| -----  |        |        |                         |           |           |  |
| 1      | 7      | 0      | -1.399861               | -2.565134 | 2.569253  |  |
| 2      | 6      | 0      | 0.060383                | -2.508195 | 2.655650  |  |
| 3      | 6      | 0      | 0.709260                | -1.135607 | 2.586680  |  |
| 4      | 6      | 0      | 0.357161                | -0.195069 | 1.612621  |  |
| 5      | 6      | 0      | -0.588897               | -0.254775 | 0.416267  |  |
| 6      | 6      | 0      | -1.972143               | -0.868004 | 0.720081  |  |
| 7      | 6      | 0      | -1.991506               | -2.315186 | 1.257843  |  |
| 8      | 8      | 0      | 0.550816                | 1.858438  | 0.552081  |  |
| 9      | 6      | 0      | 0.990755                | 1.040355  | 1.568473  |  |
| 10     | 6      | 0      | -0.722267               | 1.278383  | 0.132029  |  |
| 11     | 6      | 0      | 1.698596                | -0.754621 | 3.508329  |  |
| 12     | 6      | 0      | 2.329565                | 0.492344  | 3.456476  |  |
| 13     | 6      | 0      | 1.979114                | 1.421060  | 2.473491  |  |
| 14     | 6      | 0      | 0.136924                | -0.965244 | -0.768876 |  |
| 15     | 6      | 0      | -0.392485               | -0.559880 | -2.151982 |  |
| 16     | 6      | 0      | -0.252239               | 0.951225  | -2.358718 |  |
| 17     | 6      | 0      | -1.045828               | 1.701984  | -1.293045 |  |
| 18     | 8      | 0      | 2.579163                | 2.647791  | 2.418537  |  |
| 19     | 8      | 0      | -0.769394               | 1.379593  | -3.617391 |  |
| 20     | 1      | 0      | -1.809188               | -1.941043 | 3.262737  |  |
| 21     | 1      | 0      | 2.157608                | 3.146006  | 1.698145  |  |
| 22     | 1      | 0      | -0.255664               | 0.937618  | -4.311367 |  |
| 23     | 1      | 0      | 0.448150                | -3.151150 | 1.851981  |  |
| 24     | 1      | 0      | 0.360344                | -2.989801 | 3.595086  |  |
| 25     | 1      | 0      | -2.590778               | -0.836301 | -0.188736 |  |
| 26     | 1      | 0      | -2.480388               | -0.228149 | 1.455631  |  |

|    |   |   |           |           |           |
|----|---|---|-----------|-----------|-----------|
| 27 | 1 | 0 | -3.041885 | -2.632337 | 1.305248  |
| 28 | 1 | 0 | -1.505444 | -2.995826 | 0.546929  |
| 29 | 1 | 0 | -1.482208 | 1.688728  | 0.813574  |
| 30 | 1 | 0 | 1.984402  | -1.452289 | 4.292212  |
| 31 | 1 | 0 | 3.085764  | 0.766799  | 4.185718  |
| 32 | 1 | 0 | 0.078969  | -2.051524 | -0.640741 |
| 33 | 1 | 0 | 1.203261  | -0.712729 | -0.719671 |
| 34 | 1 | 0 | -1.448362 | -0.833936 | -2.278721 |
| 35 | 1 | 0 | 0.168359  | -1.098338 | -2.929219 |
| 36 | 1 | 0 | 0.812548  | 1.224102  | -2.271950 |
| 37 | 1 | 0 | -0.892130 | 2.781966  | -1.395346 |
| 38 | 1 | 0 | -2.112409 | 1.515763  | -1.476013 |

-----

Cartesian coordinate of SRR-inv-N\_c1:

-----

| Center | Atomic | Atomic | Coordinates (Angstroms) |           |           |
|--------|--------|--------|-------------------------|-----------|-----------|
| Number | Number | Type   | X                       | Y         | Z         |
| -----  |        |        |                         |           |           |
| 1      | 7      | 0      | -1.300395               | -2.605939 | 2.361123  |
| 2      | 6      | 0      | 0.162506                | -2.552463 | 2.433330  |
| 3      | 6      | 0      | 0.800249                | -1.173034 | 2.407927  |
| 4      | 6      | 0      | 0.483125                | -0.233079 | 1.419086  |
| 5      | 6      | 0      | -0.430698               | -0.322384 | 0.204332  |
| 6      | 6      | 0      | -1.838701               | -0.850815 | 0.553326  |
| 7      | 6      | 0      | -1.910537               | -2.305646 | 1.067004  |
| 8      | 8      | 0      | 0.641898                | 1.855850  | 0.424517  |
| 9      | 6      | 0      | 1.050224                | 1.030717  | 1.443920  |
| 10     | 6      | 0      | -0.497683               | 1.192549  | -0.210708 |
| 11     | 6      | 0      | 1.708988                | -0.770636 | 3.398594  |
| 12     | 6      | 0      | 2.286523                | 0.504401  | 3.408700  |
| 13     | 6      | 0      | 1.957406                | 1.436421  | 2.423226  |

|    |   |   |           |           |           |
|----|---|---|-----------|-----------|-----------|
| 14 | 6 | 0 | 0.214166  | -1.159586 | -0.940543 |
| 15 | 6 | 0 | 1.328533  | -0.385721 | -1.652064 |
| 16 | 6 | 0 | 0.782866  | 0.846006  | -2.403865 |
| 17 | 6 | 0 | -0.452042 | 1.446883  | -1.707418 |
| 18 | 8 | 0 | 2.499612  | 2.691436  | 2.430563  |
| 19 | 8 | 0 | 0.337836  | 0.511559  | -3.724194 |
| 20 | 1 | 0 | -1.697119 | -2.002419 | 3.079841  |
| 21 | 1 | 0 | 2.105019  | 3.183317  | 1.690949  |
| 22 | 1 | 0 | 1.114943  | 0.230223  | -4.232155 |
| 23 | 1 | 0 | 0.541754  | -3.168841 | 1.605666  |
| 24 | 1 | 0 | 0.470860  | -3.063305 | 3.354228  |
| 25 | 1 | 0 | -2.475914 | -0.772424 | -0.341089 |
| 26 | 1 | 0 | -2.284990 | -0.192393 | 1.312282  |
| 27 | 1 | 0 | -2.970896 | -2.581627 | 1.136821  |
| 28 | 1 | 0 | -1.469283 | -2.988402 | 0.329694  |
| 29 | 1 | 0 | -1.399975 | 1.647763  | 0.219646  |
| 30 | 1 | 0 | 1.970180  | -1.469161 | 4.190223  |
| 31 | 1 | 0 | 2.982063  | 0.796517  | 4.189630  |
| 32 | 1 | 0 | -0.558194 | -1.425308 | -1.675518 |
| 33 | 1 | 0 | 0.604329  | -2.100662 | -0.539865 |
| 34 | 1 | 0 | 1.848041  | -1.035335 | -2.368880 |
| 35 | 1 | 0 | 2.079902  | -0.066952 | -0.919590 |
| 36 | 1 | 0 | 1.576006  | 1.605230  | -2.464278 |
| 37 | 1 | 0 | -0.525065 | 2.520320  | -1.910482 |
| 38 | 1 | 0 | -1.339685 | 0.981662  | -2.154299 |

-----

Cartesian coordinate of SRR-inv-N\_c0:

-----

| Center | Atomic | Atomic | Coordinates (Angstroms) |   |   |
|--------|--------|--------|-------------------------|---|---|
| Number | Number | Type   | X                       | Y | Z |

-----

|    |   |   |           |           |           |
|----|---|---|-----------|-----------|-----------|
| 1  | 7 | 0 | -1.424209 | -2.304417 | 2.577358  |
| 2  | 6 | 0 | 0.042572  | -2.352135 | 2.651132  |
| 3  | 6 | 0 | 0.695958  | -0.987911 | 2.581007  |
| 4  | 6 | 0 | 0.349240  | -0.047231 | 1.607917  |
| 5  | 6 | 0 | -0.596382 | -0.100832 | 0.411433  |
| 6  | 6 | 0 | -1.974126 | -0.731153 | 0.704778  |
| 7  | 6 | 0 | -1.972830 | -2.176034 | 1.225400  |
| 8  | 8 | 0 | 0.535484  | 2.012476  | 0.559071  |
| 9  | 6 | 0 | 0.984365  | 1.187658  | 1.566580  |
| 10 | 6 | 0 | -0.740775 | 1.433508  | 0.145882  |
| 11 | 6 | 0 | 1.695792  | -0.617134 | 3.494424  |
| 12 | 6 | 0 | 2.334565  | 0.625681  | 3.440657  |
| 13 | 6 | 0 | 1.980128  | 1.560941  | 2.465549  |
| 14 | 6 | 0 | 0.138781  | -0.786637 | -0.783069 |
| 15 | 6 | 0 | -0.397711 | -0.371806 | -2.160727 |
| 16 | 6 | 0 | -0.279615 | 1.143382  | -2.350105 |
| 17 | 6 | 0 | -1.077868 | 1.870730  | -1.271806 |
| 18 | 8 | 0 | 2.584580  | 2.786114  | 2.412070  |
| 19 | 8 | 0 | -0.808255 | 1.578921  | -3.601929 |
| 20 | 1 | 0 | -1.784484 | -3.164279 | 2.983829  |
| 21 | 1 | 0 | 2.154462  | 3.291133  | 1.701590  |
| 22 | 1 | 0 | -0.291354 | 1.151535  | -4.302650 |
| 23 | 1 | 0 | 0.465419  | -3.005953 | 1.860538  |
| 24 | 1 | 0 | 0.309745  | -2.814241 | 3.607703  |
| 25 | 1 | 0 | -2.582127 | -0.703256 | -0.210282 |
| 26 | 1 | 0 | -2.490013 | -0.116128 | 1.451902  |
| 27 | 1 | 0 | -3.016955 | -2.508174 | 1.266764  |
| 28 | 1 | 0 | -1.462279 | -2.842332 | 0.502754  |
| 29 | 1 | 0 | -1.495611 | 1.832617  | 0.839355  |
| 30 | 1 | 0 | 1.980857  | -1.315817 | 4.277398  |
| 31 | 1 | 0 | 3.097245  | 0.892763  | 4.165771  |
| 32 | 1 | 0 | 0.095839  | -1.875009 | -0.668066 |

|    |   |   |           |           |           |
|----|---|---|-----------|-----------|-----------|
| 33 | 1 | 0 | 1.201474  | -0.519659 | -0.731419 |
| 34 | 1 | 0 | -1.449796 | -0.659188 | -2.289710 |
| 35 | 1 | 0 | 0.169584  | -0.892858 | -2.945272 |
| 36 | 1 | 0 | 0.781578  | 1.430122  | -2.265049 |
| 37 | 1 | 0 | -0.938458 | 2.953772  | -1.361843 |
| 38 | 1 | 0 | -2.143046 | 1.673119  | -1.451267 |

-----

Cartesian coordinate of SRR\_c1:

| Center<br>Number | Atomic<br>Number | Atomic<br>Type | Coordinates (Angstroms) |           |           |
|------------------|------------------|----------------|-------------------------|-----------|-----------|
|                  |                  |                | X                       | Y         | Z         |
| 1                | 7                | 0              | -1.418491               | -2.305006 | 2.316442  |
| 2                | 6                | 0              | 0.048497                | -2.352667 | 2.387537  |
| 3                | 6                | 0              | 0.700914                | -0.987791 | 2.320770  |
| 4                | 6                | 0              | 0.352767                | -0.044836 | 1.350434  |
| 5                | 6                | 0              | -0.593596               | -0.096992 | 0.154383  |
| 6                | 6                | 0              | -1.971215               | -0.727882 | 0.447872  |
| 7                | 6                | 0              | -1.969122               | -2.173849 | 0.965407  |
| 8                | 8                | 0              | 0.535274                | 2.018801  | 0.307742  |
| 9                | 6                | 0              | 0.986434                | 1.190894  | 1.313005  |
| 10               | 6                | 0              | -0.739089               | 1.437662  | -0.106120 |
| 11               | 6                | 0              | 1.700717                | -0.618552 | 3.234863  |
| 12               | 6                | 0              | 2.337998                | 0.625079  | 3.184729  |
| 13               | 6                | 0              | 1.981928                | 1.562787  | 2.212584  |
| 14               | 6                | 0              | 0.139575                | -0.780637 | -1.043187 |
| 15               | 6                | 0              | -0.392672               | -0.366888 | -2.422317 |
| 16               | 6                | 0              | -0.270291               | 1.141717  | -2.609699 |
| 17               | 6                | 0              | -1.072836               | 1.871772  | -1.526777 |
| 18               | 8                | 0              | 2.584875                | 2.789180  | 2.163187  |
| 19               | 8                | 0              | -0.758992               | 1.456152  | -3.913002 |

|    |   |   |           |           |           |
|----|---|---|-----------|-----------|-----------|
| 20 | 1 | 0 | -1.777668 | -3.166183 | 2.721127  |
| 21 | 1 | 0 | 2.154552  | 3.295414  | 1.453883  |
| 22 | 1 | 0 | -0.643356 | 2.409623  | -4.049767 |
| 23 | 1 | 0 | 0.470399  | -3.003481 | 1.594145  |
| 24 | 1 | 0 | 0.317514  | -2.817652 | 3.342189  |
| 25 | 1 | 0 | -2.579135 | -0.698907 | -0.467181 |
| 26 | 1 | 0 | -2.487037 | -0.114592 | 1.196581  |
| 27 | 1 | 0 | -3.013198 | -2.505991 | 1.007616  |
| 28 | 1 | 0 | -1.459723 | -2.838368 | 0.240616  |
| 29 | 1 | 0 | -1.496010 | 1.834957  | 0.586360  |
| 30 | 1 | 0 | 1.986982  | -1.319341 | 4.015494  |
| 31 | 1 | 0 | 3.100762  | 0.890853  | 3.910219  |
| 32 | 1 | 0 | 0.092509  | -1.868990 | -0.930039 |
| 33 | 1 | 0 | 1.203265  | -0.518311 | -0.989951 |
| 34 | 1 | 0 | -1.445375 | -0.652273 | -2.551765 |
| 35 | 1 | 0 | 0.170986  | -0.876859 | -3.212071 |
| 36 | 1 | 0 | 0.792198  | 1.422231  | -2.524793 |
| 37 | 1 | 0 | -0.935557 | 2.959193  | -1.603287 |
| 38 | 1 | 0 | -2.137212 | 1.672640  | -1.708709 |

-----

Cartesian coordinate of SRR-inv-N\_c2:

| Center<br>Number | Atomic<br>Number | Atomic<br>Type | Coordinates (Angstroms) |           |          |
|------------------|------------------|----------------|-------------------------|-----------|----------|
|                  |                  |                | X                       | Y         | Z        |
| 1                | 7                | 0              | -1.289899               | -2.605506 | 2.355378 |
| 2                | 6                | 0              | 0.173855                | -2.551827 | 2.412823 |
| 3                | 6                | 0              | 0.809158                | -1.171427 | 2.385004 |
| 4                | 6                | 0              | 0.483029                | -0.230763 | 1.399763 |
| 5                | 6                | 0              | -0.439280               | -0.321468 | 0.191745 |
| 6                | 6                | 0              | -1.844731               | -0.848678 | 0.553889 |

|    |   |   |           |           |           |
|----|---|---|-----------|-----------|-----------|
| 7  | 6 | 0 | -1.913363 | -2.303623 | 1.068053  |
| 8  | 8 | 0 | 0.623672  | 1.863079  | 0.411675  |
| 9  | 6 | 0 | 1.044208  | 1.035459  | 1.425043  |
| 10 | 6 | 0 | -0.510014 | 1.192892  | -0.224377 |
| 11 | 6 | 0 | 1.722348  | -0.767732 | 3.371000  |
| 12 | 6 | 0 | 2.294951  | 0.509448  | 3.380464  |
| 13 | 6 | 0 | 1.955686  | 1.442673  | 2.399577  |
| 14 | 6 | 0 | 0.193674  | -1.160122 | -0.958971 |
| 15 | 6 | 0 | 1.320896  | -0.407317 | -1.674379 |
| 16 | 6 | 0 | 0.822781  | 0.860178  | -2.388715 |
| 17 | 6 | 0 | -0.449285 | 1.433214  | -1.724311 |
| 18 | 8 | 0 | 2.492319  | 2.700115  | 2.407857  |
| 19 | 8 | 0 | 0.552155  | 0.497939  | -3.748453 |
| 20 | 1 | 0 | -1.679253 | -2.003070 | 3.079020  |
| 21 | 1 | 0 | 2.095790  | 3.191008  | 1.668764  |
| 22 | 1 | 0 | 0.245544  | 1.294268  | -4.210471 |
| 23 | 1 | 0 | 0.545311  | -3.165546 | 1.579841  |
| 24 | 1 | 0 | 0.491611  | -3.064724 | 3.329327  |
| 25 | 1 | 0 | -2.490115 | -0.770211 | -0.334849 |
| 26 | 1 | 0 | -2.283690 | -0.189570 | 1.316571  |
| 27 | 1 | 0 | -2.973400 | -2.577762 | 1.149306  |
| 28 | 1 | 0 | -1.481364 | -2.986715 | 0.325745  |
| 29 | 1 | 0 | -1.416959 | 1.646966  | 0.197401  |
| 30 | 1 | 0 | 1.991169  | -1.467065 | 4.159326  |
| 31 | 1 | 0 | 2.994570  | 0.802384  | 4.157411  |
| 32 | 1 | 0 | -0.586597 | -1.419457 | -1.687822 |
| 33 | 1 | 0 | 0.575010  | -2.106407 | -0.562047 |
| 34 | 1 | 0 | 1.797356  | -1.046695 | -2.424851 |
| 35 | 1 | 0 | 2.093996  | -0.135096 | -0.946876 |
| 36 | 1 | 0 | 1.618343  | 1.618133  | -2.363731 |
| 37 | 1 | 0 | -0.550134 | 2.505453  | -1.934517 |
| 38 | 1 | 0 | -1.317045 | 0.934862  | -2.175892 |



-----  
Cartesian coordinate of SRR-inv-N\_c5:  
-----

| Center<br>Number | Atomic<br>Number | Atomic<br>Type | Coordinates (Angstroms) |           |           |
|------------------|------------------|----------------|-------------------------|-----------|-----------|
|                  |                  |                | X                       | Y         | Z         |
| 1                | 7                | 0              | -1.291626               | -2.603441 | 2.211041  |
| 2                | 6                | 0              | 0.172398                | -2.550859 | 2.264063  |
| 3                | 6                | 0              | 0.808848                | -1.171316 | 2.226939  |
| 4                | 6                | 0              | 0.482155                | -0.235851 | 1.236831  |
| 5                | 6                | 0              | -0.443658               | -0.331938 | 0.032003  |
| 6                | 6                | 0              | -1.848603               | -0.855443 | 0.401444  |
| 7                | 6                | 0              | -1.918847               | -2.307287 | 0.924662  |
| 8                | 8                | 0              | 0.622131                | 1.852135  | 0.236675  |
| 9                | 6                | 0              | 1.043484                | 1.030483  | 1.253765  |
| 10               | 6                | 0              | -0.513095               | 1.180532  | -0.394647 |
| 11               | 6                | 0              | 1.723598                | -0.762373 | 3.209183  |
| 12               | 6                | 0              | 2.296768                | 0.514607  | 3.210267  |
| 13               | 6                | 0              | 1.956791                | 1.442765  | 2.224780  |
| 14               | 6                | 0              | 0.186552                | -1.179301 | -1.113858 |
| 15               | 6                | 0              | 1.317774                | -0.431842 | -1.832011 |
| 16               | 6                | 0              | 0.830042                | 0.849485  | -2.547938 |
| 17               | 6                | 0              | -0.451178               | 1.413640  | -1.895726 |
| 18               | 8                | 0              | 2.494271                | 2.699170  | 2.225694  |
| 19               | 8                | 0              | 0.631165                | 0.656872  | -3.950444 |
| 20               | 1                | 0              | -1.678695               | -1.998193 | 2.933507  |
| 21               | 1                | 0              | 2.100120                | 3.186870  | 1.483134  |
| 22               | 1                | 0              | -0.051415               | -0.025163 | -4.059087 |
| 23               | 1                | 0              | 0.540858                | -3.170134 | 1.433721  |
| 24               | 1                | 0              | 0.491933                | -3.059020 | 3.182487  |
| 25               | 1                | 0              | -2.497982               | -0.780279 | -0.485019 |

|    |   |   |           |           |           |
|----|---|---|-----------|-----------|-----------|
| 26 | 1 | 0 | -2.283418 | -0.190764 | 1.161337  |
| 27 | 1 | 0 | -2.979308 | -2.578087 | 1.011178  |
| 28 | 1 | 0 | -1.491373 | -2.996378 | 0.184978  |
| 29 | 1 | 0 | -1.418867 | 1.637336  | 0.026510  |
| 30 | 1 | 0 | 1.993225  | -1.457124 | 4.001240  |
| 31 | 1 | 0 | 2.997786  | 0.811524  | 3.984410  |
| 32 | 1 | 0 | -0.603060 | -1.444900 | -1.833771 |
| 33 | 1 | 0 | 0.562054  | -2.126885 | -0.714719 |
| 34 | 1 | 0 | 1.800496  | -1.073638 | -2.577823 |
| 35 | 1 | 0 | 2.089537  | -0.171004 | -1.098213 |
| 36 | 1 | 0 | 1.619499  | 1.603606  | -2.498773 |
| 37 | 1 | 0 | -0.556097 | 2.478979  | -2.125879 |
| 38 | 1 | 0 | -1.325570 | 0.915315  | -2.339799 |

-----

### 5.1.2. SRS configuration

| Conformer        | Population (%) |
|------------------|----------------|
| SRS-inv-N_c0.log | 48.199         |
| SRS_c0.log       | 40.463         |
| SRS-inv-N_c3.log | 8.247          |
| SRS_c6.log       | 1.577          |
| SRS_c7.log       | 1.513          |

Cartesian coordinate of SRS-inv-N\_c0:

-----

| Center | Atomic | Atomic | Coordinates (Angstroms) |   |   |
|--------|--------|--------|-------------------------|---|---|
| Number | Number | Type   | X                       | Y | Z |

-----

|   |   |   |           |           |           |
|---|---|---|-----------|-----------|-----------|
| 1 | 7 | 0 | -0.702554 | -2.716359 | -2.122995 |
| 2 | 6 | 0 | 0.770440  | -2.674757 | -2.172659 |
| 3 | 6 | 0 | 1.315553  | -1.260755 | -2.157381 |
| 4 | 6 | 0 | 1.057544  | -0.447654 | -1.051054 |
| 5 | 6 | 0 | 0.328559  | -0.743125 | 0.252516  |

|    |   |   |           |           |           |
|----|---|---|-----------|-----------|-----------|
| 6  | 6 | 0 | -1.146289 | -1.044797 | -0.143897 |
| 7  | 6 | 0 | -1.350389 | -2.421714 | -0.841186 |
| 8  | 8 | 0 | 0.649378  | 1.629846  | -0.079556 |
| 9  | 6 | 0 | 1.162577  | 0.935406  | -1.159445 |
| 10 | 6 | 0 | 0.605856  | 0.617443  | 0.956823  |
| 11 | 6 | 0 | 1.847568  | -0.641958 | -3.298346 |
| 12 | 6 | 0 | 2.054863  | 0.742105  | -3.359626 |
| 13 | 6 | 0 | 1.681173  | 1.562411  | -2.292247 |
| 14 | 6 | 0 | 0.865300  | -1.780749 | 1.269247  |
| 15 | 6 | 0 | 0.112971  | -1.630298 | 2.616724  |
| 16 | 6 | 0 | 0.080814  | -0.202971 | 3.200543  |
| 17 | 6 | 0 | -0.280651 | 0.884870  | 2.150531  |
| 18 | 8 | 0 | 1.803642  | 2.921648  | -2.375046 |
| 19 | 8 | 0 | 1.384757  | 0.033029  | 3.742563  |
| 20 | 1 | 0 | -1.065720 | -2.089808 | -2.839813 |
| 21 | 1 | 0 | 1.512591  | 3.291450  | -1.524627 |
| 22 | 1 | 0 | 1.389065  | 0.919973  | 4.135865  |
| 23 | 1 | 0 | 1.087754  | -3.186172 | -3.089621 |
| 24 | 1 | 0 | 1.146339  | -3.271561 | -1.332781 |
| 25 | 1 | 0 | -1.507677 | -0.242501 | -0.799958 |
| 26 | 1 | 0 | -1.804259 | -1.042445 | 0.734586  |
| 27 | 1 | 0 | -1.065508 | -3.221128 | -0.145488 |
| 28 | 1 | 0 | -2.428267 | -2.544847 | -1.006417 |
| 29 | 1 | 0 | 1.635805  | 0.553697  | 1.333057  |
| 30 | 1 | 0 | 2.080045  | -1.246706 | -4.172120 |
| 31 | 1 | 0 | 2.470214  | 1.205750  | -4.249330 |
| 32 | 1 | 0 | 1.937274  | -1.617483 | 1.424300  |
| 33 | 1 | 0 | 0.755227  | -2.810649 | 0.917525  |
| 34 | 1 | 0 | 0.574739  | -2.278088 | 3.369925  |
| 35 | 1 | 0 | -0.921264 | -1.975397 | 2.501696  |
| 36 | 1 | 0 | -0.664488 | -0.176992 | 4.010816  |
| 37 | 1 | 0 | -1.345100 | 0.840156  | 1.894053  |

|    |   |   |           |          |          |
|----|---|---|-----------|----------|----------|
| 38 | 1 | 0 | -0.091518 | 1.880396 | 2.574301 |
|----|---|---|-----------|----------|----------|

-----

Cartesian coordinate of SRS\_c0:

-----

| Center | Atomic | Atomic | Coordinates (Angstroms) |   |   |
|--------|--------|--------|-------------------------|---|---|
| Number | Number | Type   | X                       | Y | Z |

-----

|    |   |   |           |           |           |
|----|---|---|-----------|-----------|-----------|
| 1  | 7 | 0 | -0.703733 | -2.715930 | -2.243917 |
| 2  | 6 | 0 | 0.769524  | -2.675985 | -2.292782 |
| 3  | 6 | 0 | 1.316627  | -1.262827 | -2.276173 |
| 4  | 6 | 0 | 1.059459  | -0.450521 | -1.169026 |
| 5  | 6 | 0 | 0.328959  | -0.744900 | 0.133702  |
| 6  | 6 | 0 | -1.145921 | -1.043239 | -0.265191 |
| 7  | 6 | 0 | -1.352167 | -2.419640 | -0.962664 |
| 8  | 8 | 0 | 0.648564  | 1.625818  | -0.197386 |
| 9  | 6 | 0 | 1.162608  | 0.932885  | -1.276321 |
| 10 | 6 | 0 | 0.609188  | 0.614360  | 0.840526  |
| 11 | 6 | 0 | 1.847998  | -0.643141 | -3.416920 |
| 12 | 6 | 0 | 2.055387  | 0.741069  | -3.476725 |
| 13 | 6 | 0 | 1.681804  | 1.560642  | -2.408674 |
| 14 | 6 | 0 | 0.861878  | -1.785454 | 1.148802  |
| 15 | 6 | 0 | 0.099480  | -1.634395 | 2.490037  |
| 16 | 6 | 0 | 0.072787  | -0.203175 | 3.079589  |
| 17 | 6 | 0 | -0.274625 | 0.885799  | 2.036726  |
| 18 | 8 | 0 | 1.804299  | 2.919527  | -2.489936 |
| 19 | 8 | 0 | 1.353137  | 0.166641  | 3.604253  |
| 20 | 1 | 0 | -1.065214 | -2.088430 | -2.960787 |
| 21 | 1 | 0 | 1.518944  | 3.288431  | -1.637010 |
| 22 | 1 | 0 | 1.623770  | -0.518040 | 4.235527  |
| 23 | 1 | 0 | 1.086462  | -3.187367 | -3.209910 |
| 24 | 1 | 0 | 1.143956  | -3.274434 | -1.453260 |

|    |   |   |           |           |           |
|----|---|---|-----------|-----------|-----------|
| 25 | 1 | 0 | -1.502866 | -0.239995 | -0.922320 |
| 26 | 1 | 0 | -1.806718 | -1.037233 | 0.611155  |
| 27 | 1 | 0 | -1.069837 | -3.220077 | -0.266781 |
| 28 | 1 | 0 | -2.430121 | -2.540812 | -1.128956 |
| 29 | 1 | 0 | 1.640363  | 0.552357  | 1.211785  |
| 30 | 1 | 0 | 2.079822  | -1.247014 | -4.291494 |
| 31 | 1 | 0 | 2.470806  | 1.205520  | -4.365985 |
| 32 | 1 | 0 | 1.932789  | -1.618268 | 1.310084  |
| 33 | 1 | 0 | 0.757375  | -2.815025 | 0.794430  |
| 34 | 1 | 0 | 0.540135  | -2.307510 | 3.239547  |
| 35 | 1 | 0 | -0.935950 | -1.974871 | 2.365662  |
| 36 | 1 | 0 | -0.676804 | -0.173959 | 3.886175  |
| 37 | 1 | 0 | -1.338836 | 0.849510  | 1.780648  |
| 38 | 1 | 0 | -0.063414 | 1.865800  | 2.476678  |

-----

Cartesian coordinate of SRS-inv-N\_c3:

-----

| Center | Atomic | Atomic | Coordinates (Angstroms) |           |           |
|--------|--------|--------|-------------------------|-----------|-----------|
| Number | Number | Type   | X                       | Y         | Z         |
| -----  |        |        |                         |           |           |
| 1      | 7      | 0      | -0.708951               | -2.720504 | -1.960208 |
| 2      | 6      | 0      | 0.763789                | -2.680564 | -2.006594 |
| 3      | 6      | 0      | 1.310899                | -1.267093 | -1.991738 |
| 4      | 6      | 0      | 1.049368                | -0.451090 | -0.888369 |
| 5      | 6      | 0      | 0.315102                | -0.742616 | 0.412790  |
| 6      | 6      | 0      | -1.158755               | -1.044150 | 0.013204  |
| 7      | 6      | 0      | -1.361034               | -2.422627 | -0.681609 |
| 8      | 8      | 0      | 0.636234                | 1.627405  | 0.078423  |
| 9      | 6      | 0      | 1.154450                | 0.931809  | -0.999198 |
| 10     | 6      | 0      | 0.586745                | 0.620773  | 1.115360  |
| 11     | 6      | 0      | 1.847507                | -0.650175 | -3.131573 |

|    |   |   |           |           |           |
|----|---|---|-----------|-----------|-----------|
| 12 | 6 | 0 | 2.054959  | 0.733692  | -3.194816 |
| 13 | 6 | 0 | 1.676888  | 1.557207  | -2.131094 |
| 14 | 6 | 0 | 0.846829  | -1.780802 | 1.431338  |
| 15 | 6 | 0 | 0.087558  | -1.630194 | 2.777085  |
| 16 | 6 | 0 | 0.055611  | -0.198892 | 3.367393  |
| 17 | 6 | 0 | -0.292319 | 0.892483  | 2.312951  |
| 18 | 8 | 0 | 1.799708  | 2.915228  | -2.218157 |
| 19 | 8 | 0 | 1.276617  | 0.118477  | 4.042260  |
| 20 | 1 | 0 | -1.070920 | -2.097967 | -2.680991 |
| 21 | 1 | 0 | 1.502863  | 3.291105  | -1.372343 |
| 22 | 1 | 0 | 2.016686  | -0.073687 | 3.446256  |
| 23 | 1 | 0 | 1.082888  | -3.193380 | -2.922074 |
| 24 | 1 | 0 | 1.137169  | -3.277496 | -1.165511 |
| 25 | 1 | 0 | -1.515519 | -0.243004 | -0.646413 |
| 26 | 1 | 0 | -1.819464 | -1.036872 | 0.889161  |
| 27 | 1 | 0 | -1.080246 | -3.221187 | 0.016960  |
| 28 | 1 | 0 | -2.438366 | -2.544802 | -0.850184 |
| 29 | 1 | 0 | 1.626867  | 0.558785  | 1.476782  |
| 30 | 1 | 0 | 2.083186  | -1.256383 | -4.003418 |
| 31 | 1 | 0 | 2.473304  | 1.195426  | -4.084062 |
| 32 | 1 | 0 | 1.924348  | -1.623830 | 1.576134  |
| 33 | 1 | 0 | 0.742424  | -2.810902 | 1.079660  |
| 34 | 1 | 0 | 0.532948  | -2.288053 | 3.532288  |
| 35 | 1 | 0 | -0.944884 | -1.974161 | 2.642312  |
| 36 | 1 | 0 | -0.697087 | -0.167986 | 4.161604  |
| 37 | 1 | 0 | -1.355118 | 0.855641  | 2.048100  |
| 38 | 1 | 0 | -0.085395 | 1.874247  | 2.750600  |

-----

Cartesian coordinate of SRS\_c6:

-----

|        |        |        |                         |
|--------|--------|--------|-------------------------|
| Center | Atomic | Atomic | Coordinates (Angstroms) |
|--------|--------|--------|-------------------------|

| Number | Number | Type | X         | Y         | Z         |
|--------|--------|------|-----------|-----------|-----------|
| -----  |        |      |           |           |           |
| 1      | 7      | 0    | -1.124946 | -2.434750 | -1.673689 |
| 2      | 6      | 0    | 0.349492  | -2.515438 | -1.645237 |
| 3      | 6      | 0    | 1.002050  | -1.149349 | -1.693447 |
| 4      | 6      | 0    | 0.366555  | -0.019405 | -1.171857 |
| 5      | 6      | 0    | -1.008955 | 0.172777  | -0.545414 |
| 6      | 6      | 0    | -2.031151 | -0.079990 | -1.694390 |
| 7      | 6      | 0    | -1.713106 | -1.371847 | -2.503479 |
| 8      | 8      | 0    | 0.016757  | 2.283579  | -1.084514 |
| 9      | 6      | 0    | 0.849241  | 1.253525  | -1.475454 |
| 10     | 6      | 0    | -0.830389 | 1.647231  | -0.093258 |
| 11     | 6      | 0    | 2.209290  | -0.945184 | -2.381273 |
| 12     | 6      | 0    | 2.740049  | 0.331952  | -2.587468 |
| 13     | 6      | 0    | 2.045060  | 1.465339  | -2.156739 |
| 14     | 6      | 0    | -1.423436 | -0.563925 | 0.751273  |
| 15     | 6      | 0    | -2.708520 | 0.077852  | 1.334582  |
| 16     | 6      | 0    | -2.680816 | 1.615317  | 1.500017  |
| 17     | 6      | 0    | -2.124225 | 2.347389  | 0.257117  |
| 18     | 8      | 0    | 2.515562  | 2.721261  | -2.420561 |
| 19     | 8      | 0    | -1.839479 | 2.013573  | 2.589210  |
| 20     | 1      | 0    | -1.497479 | -3.339147 | -1.943851 |
| 21     | 1      | 0    | 1.900513  | 3.351943  | -2.009185 |
| 22     | 1      | 0    | -2.111633 | 1.508723  | 3.371151  |
| 23     | 1      | 0    | 0.748611  | -3.100213 | -2.492539 |
| 24     | 1      | 0    | 0.633260  | -3.061589 | -0.732757 |
| 25     | 1      | 0    | -2.025801 | 0.770423  | -2.388496 |
| 26     | 1      | 0    | -3.047467 | -0.150234 | -1.292664 |
| 27     | 1      | 0    | -2.650104 | -1.753328 | -2.924584 |
| 28     | 1      | 0    | -1.069405 | -1.118791 | -3.359029 |
| 29     | 1      | 0    | -0.223472 | 1.615164  | 0.820777  |
| 30     | 1      | 0    | 2.738533  | -1.802169 | -2.791396 |

|    |   |   |           |           |           |
|----|---|---|-----------|-----------|-----------|
| 31 | 1 | 0 | 3.676445  | 0.466995  | -3.120206 |
| 32 | 1 | 0 | -0.610882 | -0.489970 | 1.484564  |
| 33 | 1 | 0 | -1.599299 | -1.622822 | 0.550902  |
| 34 | 1 | 0 | -2.927577 | -0.372090 | 2.314124  |
| 35 | 1 | 0 | -3.568446 | -0.177141 | 0.702573  |
| 36 | 1 | 0 | -3.708989 | 1.964739  | 1.686561  |
| 37 | 1 | 0 | -2.847583 | 2.309663  | -0.564986 |
| 38 | 1 | 0 | -1.955565 | 3.397843  | 0.516046  |

-----

Cartesian coordinate of SRS\_c7:

-----

| Center | Atomic | Atomic | Coordinates (Angstroms) |           |           |
|--------|--------|--------|-------------------------|-----------|-----------|
| Number | Number | Type   | X                       | Y         | Z         |
| 1      | 7      | 0      | -1.123367               | -2.431373 | -1.375453 |
| 2      | 6      | 0      | 0.350511                | -2.511876 | -1.350497 |
| 3      | 6      | 0      | 1.002766                | -1.145575 | -1.398275 |
| 4      | 6      | 0      | 0.368160                | -0.015883 | -0.875130 |
| 5      | 6      | 0      | -1.006120               | 0.174881  | -0.244996 |
| 6      | 6      | 0      | -2.032493               | -0.078488 | -1.390139 |
| 7      | 6      | 0      | -1.714890               | -1.368666 | -2.202082 |
| 8      | 8      | 0      | 0.021559                | 2.287972  | -0.782437 |
| 9      | 6      | 0      | 0.852925                | 1.256641  | -1.176798 |
| 10     | 6      | 0      | -0.827302               | 1.649340  | 0.205219  |
| 11     | 6      | 0      | 2.209804                | -0.941448 | -2.086593 |
| 12     | 6      | 0      | 2.741480                | 0.335251  | -2.292175 |
| 13     | 6      | 0      | 2.047639                | 1.468576  | -1.859490 |
| 14     | 6      | 0      | -1.416504               | -0.560325 | 1.054412  |
| 15     | 6      | 0      | -2.696522               | 0.080702  | 1.650598  |
| 16     | 6      | 0      | -2.671127               | 1.613462  | 1.810803  |
| 17     | 6      | 0      | -2.122725               | 2.344584  | 0.554825  |



|    |   |   |           |           |           |
|----|---|---|-----------|-----------|-----------|
| 18 | 8 | 0 | 2.519112  | 2.724714  | -2.122901 |
| 19 | 8 | 0 | -1.853308 | 1.887851  | 2.954042  |
| 20 | 1 | 0 | -1.497786 | -3.336084 | -1.641509 |
| 21 | 1 | 0 | 1.901497  | 3.355423  | -1.715819 |
| 22 | 1 | 0 | -1.830187 | 2.849714  | 3.079509  |
| 23 | 1 | 0 | 0.748323  | -3.095306 | -2.199481 |
| 24 | 1 | 0 | 0.636786  | -3.058574 | -0.439234 |
| 25 | 1 | 0 | -2.033385 | 0.772146  | -2.084242 |
| 26 | 1 | 0 | -3.045992 | -0.152587 | -0.982069 |
| 27 | 1 | 0 | -2.652608 | -1.750410 | -2.621303 |
| 28 | 1 | 0 | -1.073845 | -1.113323 | -3.059075 |
| 29 | 1 | 0 | -0.223410 | 1.615590  | 1.122032  |
| 30 | 1 | 0 | 2.738095  | -1.798511 | -2.497732 |
| 31 | 1 | 0 | 3.677351  | 0.470133  | -2.825857 |
| 32 | 1 | 0 | -0.600306 | -0.492154 | 1.783414  |
| 33 | 1 | 0 | -1.598156 | -1.617925 | 0.852598  |
| 34 | 1 | 0 | -2.892545 | -0.347457 | 2.640030  |
| 35 | 1 | 0 | -3.562263 | -0.175547 | 1.028185  |
| 36 | 1 | 0 | -3.698446 | 1.960658  | 2.003988  |
| 37 | 1 | 0 | -2.848481 | 2.299746  | -0.265626 |
| 38 | 1 | 0 | -1.959443 | 3.406009  | 0.786414  |

-----

### 5.1.3. SSR configuration

| Conformer   | Population (%) |
|-------------|----------------|
| ssr_c1.log  | 60.697         |
| ssr_c2.log  | 15.489         |
| ssr_c3.log  | 15.229         |
| ssr_c5.log  | 2.885          |
| ssr_c4.log  | 2.806          |
| ssr_c7.log  | 1.771          |
| ssr_c18.log | 1.122          |

Cartesian coordinate of SSR\_c1:

| Center<br>Number | Atomic<br>Number | Atomic<br>Type | Coordinates (Angstroms) |           |           |
|------------------|------------------|----------------|-------------------------|-----------|-----------|
|                  |                  |                | X                       | Y         | Z         |
| 1                | 6                | 0              | -2.199831               | -1.989568 | 2.001952  |
| 2                | 6                | 0              | -2.753852               | -1.551792 | 0.794109  |
| 3                | 6                | 0              | -2.040831               | -0.749648 | -0.115448 |
| 4                | 6                | 0              | -0.740457               | -0.383791 | 0.249210  |
| 5                | 6                | 0              | -0.200978               | -0.825071 | 1.453294  |
| 6                | 6                | 0              | -0.896137               | -1.627522 | 2.353100  |
| 7                | 6                | 0              | -2.662608               | -0.323743 | -1.435993 |
| 8                | 7                | 0              | -2.530826               | 1.082821  | -1.816908 |
| 9                | 6                | 0              | -1.212331               | 1.533882  | -2.253645 |
| 10               | 6                | 0              | -0.111107               | 1.678421  | -1.181262 |
| 11               | 6                | 0              | 0.357883                | 0.384938  | -0.481714 |
| 12               | 6                | 0              | 1.267055                | 0.733023  | 0.740164  |
| 13               | 8                | 0              | 1.097308                | -0.397721 | 1.665628  |
| 14               | 6                | 0              | 1.098737                | -0.592429 | -1.450558 |
| 15               | 6                | 0              | 2.554664                | -0.205025 | -1.744941 |
| 16               | 6                | 0              | 3.380813                | -0.076569 | -0.454913 |
| 17               | 6                | 0              | 2.747032                | 0.967589  | 0.472317  |
| 18               | 8                | 0              | -0.352846               | -2.046964 | 3.537046  |
| 19               | 8                | 0              | 3.543022                | -1.339941 | 0.199923  |
| 20               | 1                | 0              | 0.838851                | 1.604885  | 1.254805  |
| 21               | 1                | 0              | -2.774715               | -2.601475 | 2.689720  |
| 22               | 1                | 0              | -3.773853               | -1.841000 | 0.553965  |
| 23               | 1                | 0              | -2.235955               | -0.916414 | -2.257454 |
| 24               | 1                | 0              | -3.731076               | -0.567926 | -1.412758 |
| 25               | 1                | 0              | -2.897840               | 1.686062  | -1.085055 |
| 26               | 1                | 0              | -1.340594               | 2.515390  | -2.727049 |
| 27               | 1                | 0              | -0.883651               | 0.856922  | -3.051972 |
| 28               | 1                | 0              | 0.754090                | 2.165716  | -1.653380 |

|    |   |   |           |           |           |
|----|---|---|-----------|-----------|-----------|
| 29 | 1 | 0 | -0.475901 | 2.376449  | -0.414921 |
| 30 | 1 | 0 | 0.533801  | -0.679252 | -2.384048 |
| 31 | 1 | 0 | 1.093629  | -1.594117 | -1.007582 |
| 32 | 1 | 0 | 2.606917  | 0.746062  | -2.292958 |
| 33 | 1 | 0 | 3.012153  | -0.966995 | -2.385178 |
| 34 | 1 | 0 | 4.397023  | 0.243985  | -0.710504 |
| 35 | 1 | 0 | 2.846209  | 1.958474  | 0.010831  |
| 36 | 1 | 0 | 3.285778  | 1.007261  | 1.426003  |
| 37 | 1 | 0 | 0.526899  | -1.654726 | 3.635797  |
| 38 | 1 | 0 | 2.785527  | -1.483190 | 0.786578  |

-----

Cartesian coordinate of SSR\_c2:

-----

| Center | Atomic | Atomic | Coordinates (Angstroms) |           |           |
|--------|--------|--------|-------------------------|-----------|-----------|
| Number | Number | Type   | X                       | Y         | Z         |
| -----  |        |        |                         |           |           |
| 1      | 6      | 0      | -2.599112               | 0.436956  | 0.053025  |
| 2      | 6      | 0      | -1.788916               | 1.564880  | 0.234500  |
| 3      | 6      | 0      | -0.422902               | 1.463430  | 0.547172  |
| 4      | 6      | 0      | 0.105024                | 0.171704  | 0.671187  |
| 5      | 6      | 0      | -0.708022               | -0.938856 | 0.498503  |
| 6      | 6      | 0      | -2.064823               | -0.845640 | 0.191084  |
| 7      | 6      | 0      | 0.429939                | 2.702325  | 0.770712  |
| 8      | 7      | 0      | 1.189488                | 2.762297  | 2.022197  |
| 9      | 6      | 0      | 2.357691                | 1.891301  | 2.140254  |
| 10     | 6      | 0      | 2.113704                | 0.369265  | 2.236017  |
| 11     | 6      | 0      | 1.517150                | -0.307374 | 0.981814  |
| 12     | 6      | 0      | 1.250417                | -1.830438 | 1.258751  |
| 13     | 8      | 0      | -0.057035               | -2.142333 | 0.656359  |
| 14     | 6      | 0      | 2.463917                | -0.150183 | -0.246367 |
| 15     | 6      | 0      | 2.181173                | -1.189511 | -1.340430 |

|    |   |   |           |           |           |
|----|---|---|-----------|-----------|-----------|
| 16 | 6 | 0 | 2.416774  | -2.642611 | -0.861127 |
| 17 | 6 | 0 | 2.295487  | -2.763721 | 0.673807  |
| 18 | 8 | 0 | -2.857383 | -1.950930 | 0.031629  |
| 19 | 8 | 0 | 1.545975  | -3.560396 | -1.528443 |
| 20 | 1 | 0 | 1.134867  | -1.995916 | 2.337520  |
| 21 | 1 | 0 | -3.654578 | 0.540271  | -0.177813 |
| 22 | 1 | 0 | -2.237612 | 2.550398  | 0.139603  |
| 23 | 1 | 0 | 1.153732  | 2.821585  | -0.047234 |
| 24 | 1 | 0 | -0.219178 | 3.584494  | 0.729683  |
| 25 | 1 | 0 | 0.567371  | 2.640110  | 2.817405  |
| 26 | 1 | 0 | 2.901567  | 2.199072  | 3.041677  |
| 27 | 1 | 0 | 3.022277  | 2.115495  | 1.296614  |
| 28 | 1 | 0 | 3.074538  | -0.113565 | 2.471031  |
| 29 | 1 | 0 | 1.449519  | 0.177180  | 3.089740  |
| 30 | 1 | 0 | 2.365820  | 0.856677  | -0.662768 |
| 31 | 1 | 0 | 3.505534  | -0.242205 | 0.092891  |
| 32 | 1 | 0 | 2.791289  | -0.987913 | -2.226935 |
| 33 | 1 | 0 | 1.137455  | -1.094788 | -1.663109 |
| 34 | 1 | 0 | 3.420043  | -2.969581 | -1.152770 |
| 35 | 1 | 0 | 3.255285  | -2.519779 | 1.147863  |
| 36 | 1 | 0 | 2.073822  | -3.804668 | 0.931115  |
| 37 | 1 | 0 | -2.342646 | -2.741083 | 0.250725  |
| 38 | 1 | 0 | 0.643951  | -3.361046 | -1.236884 |

-----

Cartesian coordinate of SSR\_c3:

-----

| Center | Atomic | Atomic | Coordinates (Angstroms) |   |   |
|--------|--------|--------|-------------------------|---|---|
| Number | Number | Type   | X                       | Y | Z |

-----

|   |   |   |           |           |          |
|---|---|---|-----------|-----------|----------|
| 1 | 6 | 0 | -2.316827 | -2.180534 | 1.893509 |
| 2 | 6 | 0 | -2.847331 | -1.715998 | 0.685311 |

|    |   |   |           |           |           |
|----|---|---|-----------|-----------|-----------|
| 3  | 6 | 0 | -2.096184 | -0.945862 | -0.220045 |
| 4  | 6 | 0 | -0.779887 | -0.648345 | 0.142880  |
| 5  | 6 | 0 | -0.266008 | -1.109622 | 1.350804  |
| 6  | 6 | 0 | -0.999737 | -1.877040 | 2.249567  |
| 7  | 6 | 0 | -2.694760 | -0.488657 | -1.533904 |
| 8  | 7 | 0 | -2.455706 | 0.930684  | -1.828050 |
| 9  | 6 | 0 | -1.136782 | 1.247032  | -2.382413 |
| 10 | 6 | 0 | -0.040123 | 1.361532  | -1.313462 |
| 11 | 6 | 0 | 0.358984  | 0.058619  | -0.588095 |
| 12 | 6 | 0 | 1.271327  | 0.380627  | 0.637387  |
| 13 | 8 | 0 | 1.048506  | -0.736758 | 1.568382  |
| 14 | 6 | 0 | 1.064534  | -0.968266 | -1.532206 |
| 15 | 6 | 0 | 2.538400  | -0.649817 | -1.820559 |
| 16 | 6 | 0 | 3.359591  | -0.533078 | -0.526246 |
| 17 | 6 | 0 | 2.761647  | 0.550923  | 0.379015  |
| 18 | 8 | 0 | -0.480493 | -2.318531 | 3.436810  |
| 19 | 8 | 0 | 3.465495  | -1.790797 | 0.150677  |
| 20 | 1 | 0 | 0.874669  | 1.272914  | 1.141733  |
| 21 | 1 | 0 | -2.922080 | -2.764286 | 2.579571  |
| 22 | 1 | 0 | -3.880728 | -1.953239 | 0.446406  |
| 23 | 1 | 0 | -2.317936 | -1.134535 | -2.351937 |
| 24 | 1 | 0 | -3.777659 | -0.640973 | -1.490908 |
| 25 | 1 | 0 | -3.170353 | 1.253367  | -2.472373 |
| 26 | 1 | 0 | -1.216227 | 2.222015  | -2.875795 |
| 27 | 1 | 0 | -0.835225 | 0.523685  | -3.163286 |
| 28 | 1 | 0 | 0.852269  | 1.786252  | -1.793178 |
| 29 | 1 | 0 | -0.383744 | 2.089457  | -0.568947 |
| 30 | 1 | 0 | 0.504039  | -1.047456 | -2.468990 |
| 31 | 1 | 0 | 1.011822  | -1.960443 | -1.071268 |
| 32 | 1 | 0 | 2.636110  | 0.287806  | -2.385394 |
| 33 | 1 | 0 | 2.967763  | -1.442508 | -2.442837 |
| 34 | 1 | 0 | 4.389964  | -0.258396 | -0.778753 |

|    |   |   |          |           |           |
|----|---|---|----------|-----------|-----------|
| 35 | 1 | 0 | 2.904672 | 1.529781  | -0.096573 |
| 36 | 1 | 0 | 3.294145 | 0.583506  | 1.336494  |
| 37 | 1 | 0 | 0.413075 | -1.960499 | 3.540872  |
| 38 | 1 | 0 | 2.695478 | -1.894063 | 0.729604  |

-----

Cartesian coordinate of SSR\_c5:

-----

| Center | Atomic | Atomic | Coordinates (Angstroms) |           |           |
|--------|--------|--------|-------------------------|-----------|-----------|
| Number | Number | Type   | X                       | Y         | Z         |
| 1      | 6      | 0      | 0.138782                | 2.565245  | 2.691720  |
| 2      | 6      | 0      | 1.274699                | 2.471357  | 1.877962  |
| 3      | 6      | 0      | 1.381372                | 1.522585  | 0.845813  |
| 4      | 6      | 0      | 0.302305                | 0.647307  | 0.676361  |
| 5      | 6      | 0      | -0.816713               | 0.741428  | 1.496419  |
| 6      | 6      | 0      | -0.936165               | 1.692469  | 2.507963  |
| 7      | 6      | 0      | 2.613594                | 1.464871  | -0.042250 |
| 8      | 7      | 0      | 3.218522                | 0.148958  | -0.260493 |
| 9      | 6      | 0      | 2.504502                | -0.774037 | -1.139403 |
| 10     | 6      | 0      | 1.192848                | -1.398418 | -0.615712 |
| 11     | 6      | 0      | 0.013018                | -0.434557 | -0.359454 |
| 12     | 6      | 0      | -1.150044               | -1.181824 | 0.374018  |
| 13     | 8      | 0      | -1.797630               | -0.175567 | 1.210645  |
| 14     | 6      | 0      | -0.514976               | 0.235478  | -1.664211 |
| 15     | 6      | 0      | -1.344464               | -0.708063 | -2.545069 |
| 16     | 6      | 0      | -2.578462               | -1.231931 | -1.796056 |
| 17     | 6      | 0      | -2.172823               | -1.916595 | -0.487751 |
| 18     | 8      | 0      | -2.047149               | 1.773510  | 3.303686  |
| 19     | 8      | 0      | -3.494240               | -0.176953 | -1.474291 |
| 20     | 1      | 0      | -0.701828               | -1.901998 | 1.074870  |
| 21     | 1      | 0      | 0.080871                | 3.305383  | 3.483602  |

|    |   |   |           |           |           |
|----|---|---|-----------|-----------|-----------|
| 22 | 1 | 0 | 2.100472  | 3.156385  | 2.053113  |
| 23 | 1 | 0 | 2.381703  | 1.875262  | -1.035237 |
| 24 | 1 | 0 | 3.381457  | 2.121717  | 0.382957  |
| 25 | 1 | 0 | 3.431830  | -0.293231 | 0.630285  |
| 26 | 1 | 0 | 3.189830  | -1.597964 | -1.375329 |
| 27 | 1 | 0 | 2.328139  | -0.250836 | -2.087634 |
| 28 | 1 | 0 | 0.881985  | -2.173140 | -1.331603 |
| 29 | 1 | 0 | 1.419180  | -1.923420 | 0.322436  |
| 30 | 1 | 0 | -1.146184 | 1.084121  | -1.382866 |
| 31 | 1 | 0 | 0.323763  | 0.647465  | -2.234203 |
| 32 | 1 | 0 | -0.747387 | -1.565496 | -2.884031 |
| 33 | 1 | 0 | -1.663370 | -0.181143 | -3.454598 |
| 34 | 1 | 0 | -3.094248 | -1.977223 | -2.420982 |
| 35 | 1 | 0 | -3.065339 | -2.119729 | 0.113361  |
| 36 | 1 | 0 | -1.737217 | -2.890165 | -0.746752 |
| 37 | 1 | 0 | -2.679725 | 1.096502  | 3.021331  |
| 38 | 1 | 0 | -3.811307 | 0.221147  | -2.295916 |

-----

Cartesian coordinate of SSR\_c4:

-----

| Center | Atomic | Atomic | Coordinates (Angstroms) |           |           |
|--------|--------|--------|-------------------------|-----------|-----------|
| Number | Number | Type   | X                       | Y         | Z         |
| -----  |        |        |                         |           |           |
| 1      | 6      | 0      | -0.854200               | -0.197437 | -2.728096 |
| 2      | 6      | 0      | 0.366764                | 0.481486  | -2.631370 |
| 3      | 6      | 0      | 0.976756                | 0.749926  | -1.395582 |
| 4      | 6      | 0      | 0.312949                | 0.300263  | -0.249035 |
| 5      | 6      | 0      | -0.903718               | -0.357695 | -0.354393 |
| 6      | 6      | 0      | -1.518958               | -0.623062 | -1.576439 |
| 7      | 6      | 0      | 2.283340                | 1.511739  | -1.311453 |
| 8      | 7      | 0      | 2.215501                | 2.675750  | -0.415275 |

|    |   |   |           |           |           |
|----|---|---|-----------|-----------|-----------|
| 9  | 6 | 0 | 2.359275  | 2.390480  | 1.015732  |
| 10 | 6 | 0 | 1.082633  | 1.822221  | 1.654127  |
| 11 | 6 | 0 | 0.685576  | 0.391790  | 1.224516  |
| 12 | 6 | 0 | -0.675571 | -0.018295 | 1.890944  |
| 13 | 8 | 0 | -1.450086 | -0.724312 | 0.856115  |
| 14 | 6 | 0 | 1.791802  | -0.639865 | 1.603175  |
| 15 | 6 | 0 | 1.255922  | -2.076929 | 1.672024  |
| 16 | 6 | 0 | 0.173859  | -2.260506 | 2.763602  |
| 17 | 6 | 0 | -0.530183 | -0.927126 | 3.098549  |
| 18 | 8 | 0 | -2.723778 | -1.268767 | -1.666004 |
| 19 | 8 | 0 | -0.769277 | -3.272271 | 2.398801  |
| 20 | 1 | 0 | -1.251142 | 0.881955  | 2.141192  |
| 21 | 1 | 0 | -1.313047 | -0.382451 | -3.694036 |
| 22 | 1 | 0 | 0.845792  | 0.824192  | -3.544665 |
| 23 | 1 | 0 | 3.099659  | 0.823907  | -1.014838 |
| 24 | 1 | 0 | 2.533914  | 1.878621  | -2.311421 |
| 25 | 1 | 0 | 2.930425  | 3.341528  | -0.690937 |
| 26 | 1 | 0 | 2.581782  | 3.341586  | 1.511772  |
| 27 | 1 | 0 | 3.214417  | 1.719568  | 1.221359  |
| 28 | 1 | 0 | 1.218906  | 1.829101  | 2.745397  |
| 29 | 1 | 0 | 0.258017  | 2.506407  | 1.422386  |
| 30 | 1 | 0 | 2.609619  | -0.587415 | 0.878538  |
| 31 | 1 | 0 | 2.223965  | -0.358414 | 2.574053  |
| 32 | 1 | 0 | 2.075501  | -2.783332 | 1.840053  |
| 33 | 1 | 0 | 0.820042  | -2.343736 | 0.701937  |
| 34 | 1 | 0 | 0.634331  | -2.645228 | 3.679353  |
| 35 | 1 | 0 | 0.043953  | -0.377619 | 3.856137  |
| 36 | 1 | 0 | -1.507748 | -1.143921 | 3.541611  |
| 37 | 1 | 0 | -3.077160 | -1.398503 | -0.774104 |
| 38 | 1 | 0 | -1.259831 | -2.940436 | 1.632170  |

---



Cartesian coordinate of SSR\_c7:

| -----  |        |        |                         |           |           |  |
|--------|--------|--------|-------------------------|-----------|-----------|--|
| Center | Atomic | Atomic | Coordinates (Angstroms) |           |           |  |
| Number | Number | Type   | X                       | Y         | Z         |  |
| -----  |        |        |                         |           |           |  |
| 1      | 6      | 0      | 3.295972                | 0.244938  | 0.418485  |  |
| 2      | 6      | 0      | 2.935780                | -0.304831 | -0.819306 |  |
| 3      | 6      | 0      | 1.595019                | -0.511208 | -1.184291 |  |
| 4      | 6      | 0      | 0.619606                | -0.150416 | -0.245308 |  |
| 5      | 6      | 0      | 0.986436                | 0.372457  | 0.985933  |  |
| 6      | 6      | 0      | 2.315408                | 0.593116  | 1.349012  |  |
| 7      | 6      | 0      | 1.227007                | -1.123733 | -2.525950 |  |
| 8      | 7      | 0      | 0.322124                | -2.276508 | -2.500138 |  |
| 9      | 6      | 0      | -1.083359               | -2.018194 | -2.190689 |  |
| 10     | 6      | 0      | -1.436086               | -1.582791 | -0.751435 |  |
| 11     | 6      | 0      | -0.901758               | -0.203476 | -0.306740 |  |
| 12     | 6      | 0      | -1.256375               | 0.066619  | 1.201752  |  |
| 13     | 8      | 0      | -0.067931               | 0.663436  | 1.811845  |  |
| 14     | 6      | 0      | -1.469340               | 0.935718  | -1.206977 |  |
| 15     | 6      | 0      | -1.455567               | 2.294991  | -0.493937 |  |
| 16     | 6      | 0      | -2.445393               | 2.306938  | 0.682223  |  |
| 17     | 6      | 0      | -2.461691               | 0.964152  | 1.442101  |  |
| 18     | 8      | 0      | 2.658749                | 1.118493  | 2.565164  |  |
| 19     | 8      | 0      | -2.139874               | 3.334737  | 1.634251  |  |
| 20     | 1      | 0      | -1.409801               | -0.893412 | 1.712812  |  |
| 21     | 1      | 0      | 4.339134                | 0.393400  | 0.679136  |  |
| 22     | 1      | 0      | 3.722506                | -0.584088 | -1.515588 |  |
| 23     | 1      | 0      | 2.148323                | -1.432326 | -3.033265 |  |
| 24     | 1      | 0      | 0.761933                | -0.370309 | -3.176965 |  |
| 25     | 1      | 0      | 0.695869                | -3.002020 | -1.893151 |  |
| 26     | 1      | 0      | -1.447052               | -1.274247 | -2.910668 |  |
| 27     | 1      | 0      | -1.637393               | -2.940330 | -2.405339 |  |

|    |   |   |           |           |           |
|----|---|---|-----------|-----------|-----------|
| 28 | 1 | 0 | -2.532825 | -1.582392 | -0.656976 |
| 29 | 1 | 0 | -1.061907 | -2.346446 | -0.056139 |
| 30 | 1 | 0 | -0.894668 | 0.995560  | -2.135603 |
| 31 | 1 | 0 | -2.501140 | 0.687968  | -1.496682 |
| 32 | 1 | 0 | -1.706728 | 3.096297  | -1.200255 |
| 33 | 1 | 0 | -0.450740 | 2.506373  | -0.111283 |
| 34 | 1 | 0 | -3.458029 | 2.485456  | 0.287532  |
| 35 | 1 | 0 | -2.558071 | 1.171629  | 2.512254  |
| 36 | 1 | 0 | -3.350509 | 0.390323  | 1.151658  |
| 37 | 1 | 0 | 1.849230  | 1.297061  | 3.066364  |
| 38 | 1 | 0 | -2.104158 | 4.184662  | 1.175061  |

-----

Cartesian coordinate of SSR\_c18:

-----

| Center<br>Number | Atomic<br>Number | Atomic<br>Type | Coordinates (Angstroms) |   |   |
|------------------|------------------|----------------|-------------------------|---|---|
|                  |                  |                | X                       | Y | Z |

-----

|    |   |   |           |           |           |
|----|---|---|-----------|-----------|-----------|
| 1  | 6 | 0 | 0.205937  | 0.217522  | 3.682374  |
| 2  | 6 | 0 | 0.016837  | -1.088658 | 3.216578  |
| 3  | 6 | 0 | -0.145968 | -1.373153 | 1.851407  |
| 4  | 6 | 0 | -0.140291 | -0.283639 | 0.972191  |
| 5  | 6 | 0 | 0.040271  | 1.016376  | 1.444264  |
| 6  | 6 | 0 | 0.226205  | 1.301134  | 2.797432  |
| 7  | 6 | 0 | -0.295100 | -2.807922 | 1.369654  |
| 8  | 7 | 0 | -1.360076 | -3.088460 | 0.407162  |
| 9  | 6 | 0 | -1.155882 | -2.620915 | -0.961616 |
| 10 | 6 | 0 | -1.253263 | -1.103019 | -1.220118 |
| 11 | 6 | 0 | -0.189635 | -0.206109 | -0.552320 |
| 12 | 6 | 0 | -0.582076 | 1.296302  | -0.702083 |
| 13 | 8 | 0 | 0.037868  | 1.962428  | 0.445954  |
| 14 | 6 | 0 | 1.249277  | -0.452311 | -1.112034 |

|    |   |   |           |           |           |
|----|---|---|-----------|-----------|-----------|
| 15 | 6 | 0 | 1.521355  | 0.216073  | -2.466719 |
| 16 | 6 | 0 | 1.268964  | 1.731788  | -2.412225 |
| 17 | 6 | 0 | -0.178360 | 2.005587  | -1.987285 |
| 18 | 8 | 0 | 0.405914  | 2.604451  | 3.176758  |
| 19 | 8 | 0 | 2.210212  | 2.391847  | -1.558732 |
| 20 | 1 | 0 | -1.667907 | 1.388390  | -0.553186 |
| 21 | 1 | 0 | 0.327014  | 0.398949  | 4.748403  |
| 22 | 1 | 0 | -0.001846 | -1.903354 | 3.935850  |
| 23 | 1 | 0 | 0.644731  | -3.144856 | 0.910187  |
| 24 | 1 | 0 | -0.450714 | -3.452618 | 2.242751  |
| 25 | 1 | 0 | -2.257745 | -2.774666 | 0.767799  |
| 26 | 1 | 0 | -0.184762 | -3.006197 | -1.296416 |
| 27 | 1 | 0 | -1.907107 | -3.112291 | -1.592607 |
| 28 | 1 | 0 | -2.246975 | -0.767762 | -0.891750 |
| 29 | 1 | 0 | -1.221089 | -0.945837 | -2.307854 |
| 30 | 1 | 0 | 1.975449  | -0.063695 | -0.390367 |
| 31 | 1 | 0 | 1.438396  | -1.528739 | -1.175264 |
| 32 | 1 | 0 | 0.892156  | -0.218228 | -3.256331 |
| 33 | 1 | 0 | 2.562990  | 0.039529  | -2.756323 |
| 34 | 1 | 0 | 1.434017  | 2.157089  | -3.409091 |
| 35 | 1 | 0 | -0.344684 | 3.082582  | -1.870219 |
| 36 | 1 | 0 | -0.852350 | 1.664378  | -2.783454 |
| 37 | 1 | 0 | 0.530184  | 2.648767  | 4.133873  |
| 38 | 1 | 0 | 1.840855  | 2.439535  | -0.663744 |

-----

#### 5.1.4. SSS configuration

| Conformer        | Population (%) |
|------------------|----------------|
| SSS-inv-N_c0.log | 47.949         |
| SSS-inv-N_c1.log | 45.667         |
| SSS-inv-N_c5.log | 2.210          |
| SSS-inv-N_c7.log | 2.208          |
| SSS-inv-N_c6.log | 1.967          |

Cartesian coordinate of SSS-inv-N\_c0:

| -----  |        |        |                         |           |           |  |
|--------|--------|--------|-------------------------|-----------|-----------|--|
| Center | Atomic | Atomic | Coordinates (Angstroms) |           |           |  |
| Number | Number | Type   | X                       | Y         | Z         |  |
| -----  |        |        |                         |           |           |  |
| 1      | 7      | 0      | -0.704583               | -2.723089 | -2.298785 |  |
| 2      | 6      | 0      | 0.768205                | -2.680200 | -2.345128 |  |
| 3      | 6      | 0      | 1.312165                | -1.265571 | -2.333956 |  |
| 4      | 6      | 0      | 1.049008                | -0.446990 | -1.232789 |  |
| 5      | 6      | 0      | 0.315386                | -0.736958 | 0.069034  |  |
| 6      | 6      | 0      | -1.157610               | -1.044302 | -0.327338 |  |
| 7      | 6      | 0      | -1.356158               | -2.424304 | -1.019643 |  |
| 8      | 8      | 0      | 0.635183                | 1.634923  | -0.272381 |  |
| 9      | 6      | 0      | 1.153822                | 0.935645  | -1.347839 |  |
| 10     | 6      | 0      | 0.586525                | 0.628786  | 0.766590  |  |
| 11     | 6      | 0      | 1.848674                | -0.651464 | -3.475363 |  |
| 12     | 6      | 0      | 2.054993                | 0.732408  | -3.542810 |  |
| 13     | 6      | 0      | 1.676158                | 1.558137  | -2.481335 |  |
| 14     | 6      | 0      | 0.850664                | -1.768152 | 1.093093  |  |
| 15     | 6      | 0      | 0.107348                | -1.606186 | 2.443288  |  |
| 16     | 6      | 0      | 0.088109                | -0.174322 | 3.012144  |  |
| 17     | 6      | 0      | -0.298679               | 0.898609  | 1.960933  |  |
| 18     | 8      | 0      | 1.798291                | 2.916600  | -2.571103 |  |
| 19     | 8      | 0      | -0.815907               | -0.194658 | 4.112542  |  |
| 20     | 1      | 0      | -1.067345               | -2.101160 | -3.019777 |  |
| 21     | 1      | 0      | 1.496141                | 3.292951  | -1.727479 |  |
| 22     | 1      | 0      | -0.785435               | 0.676844  | 4.537629  |  |
| 23     | 1      | 0      | 1.088703                | -3.194609 | -3.259258 |  |
| 24     | 1      | 0      | 1.142696                | -3.273530 | -1.502063 |  |
| 25     | 1      | 0      | -1.520100               | -0.245198 | -0.986631 |  |
| 26     | 1      | 0      | -1.814198               | -1.040567 | 0.551303  |  |

|    |   |   |           |           |           |
|----|---|---|-----------|-----------|-----------|
| 27 | 1 | 0 | -1.072124 | -3.220614 | -0.320095 |
| 28 | 1 | 0 | -2.433286 | -2.550011 | -1.186725 |
| 29 | 1 | 0 | 1.624209  | 0.563660  | 1.133877  |
| 30 | 1 | 0 | 2.085226  | -1.260147 | -4.345258 |
| 31 | 1 | 0 | 2.473103  | 1.191859  | -4.433359 |
| 32 | 1 | 0 | 1.927895  | -1.611996 | 1.232141  |
| 33 | 1 | 0 | 0.734340  | -2.799689 | 0.749672  |
| 34 | 1 | 0 | 0.554842  | -2.265767 | 3.195292  |
| 35 | 1 | 0 | -0.935084 | -1.928958 | 2.339150  |
| 36 | 1 | 0 | 1.104961  | 0.067486  | 3.367427  |
| 37 | 1 | 0 | -1.363073 | 0.819804  | 1.717659  |
| 38 | 1 | 0 | -0.119941 | 1.902781  | 2.367888  |

-----

Cartesian coordinate of SSS-inv-N\_c1:

-----

| Center | Atomic | Atomic | Coordinates (Angstroms) |           |           |
|--------|--------|--------|-------------------------|-----------|-----------|
| Number | Number | Type   | X                       | Y         | Z         |
| 1      | 7      | 0      | -0.700449               | -2.724143 | -2.126075 |
| 2      | 6      | 0      | 0.772589                | -2.681009 | -2.167935 |
| 3      | 6      | 0      | 1.315870                | -1.266223 | -2.152325 |
| 4      | 6      | 0      | 1.049297                | -0.449948 | -1.050248 |
| 5      | 6      | 0      | 0.312984                | -0.742534 | 0.249575  |
| 6      | 6      | 0      | -1.158541               | -1.048705 | -0.153303 |
| 7      | 6      | 0      | -1.355950               | -2.427638 | -0.849121 |
| 8      | 8      | 0      | 0.630436                | 1.629291  | -0.087077 |
| 9      | 6      | 0      | 1.152550                | 0.933087  | -1.162224 |
| 10     | 6      | 0      | 0.582166                | 0.622177  | 0.951104  |
| 11     | 6      | 0      | 1.854599                | -0.649382 | -3.291167 |
| 12     | 6      | 0      | 2.060008                | 0.734761  | -3.355094 |
| 13     | 6      | 0      | 1.677697                | 1.558268  | -2.293044 |

|    |   |   |           |           |           |
|----|---|---|-----------|-----------|-----------|
| 14 | 6 | 0 | 0.846169  | -1.777852 | 1.270731  |
| 15 | 6 | 0 | 0.102534  | -1.615749 | 2.622097  |
| 16 | 6 | 0 | 0.081623  | -0.179358 | 3.197639  |
| 17 | 6 | 0 | -0.300258 | 0.895291  | 2.147526  |
| 18 | 8 | 0 | 1.798816  | 2.916588  | -2.380203 |
| 19 | 8 | 0 | -0.729234 | -0.100906 | 4.363922  |
| 20 | 1 | 0 | -1.061297 | -2.101672 | -2.847521 |
| 21 | 1 | 0 | 1.499475  | 3.291650  | -1.534927 |
| 22 | 1 | 0 | -1.636913 | -0.328178 | 4.104616  |
| 23 | 1 | 0 | 1.095526  | -3.193610 | -3.082173 |
| 24 | 1 | 0 | 1.144729  | -3.276275 | -1.325172 |
| 25 | 1 | 0 | -1.518519 | -0.247872 | -0.811703 |
| 26 | 1 | 0 | -1.820412 | -1.046329 | 0.722025  |
| 27 | 1 | 0 | -1.074444 | -3.225316 | -0.149939 |
| 28 | 1 | 0 | -2.432706 | -2.552343 | -1.019964 |
| 29 | 1 | 0 | 1.619745  | 0.557129  | 1.318411  |
| 30 | 1 | 0 | 2.093988  | -1.256053 | -4.161684 |
| 31 | 1 | 0 | 2.480290  | 1.196384  | -4.243492 |
| 32 | 1 | 0 | 1.922678  | -1.621815 | 1.414055  |
| 33 | 1 | 0 | 0.731155  | -2.808382 | 0.923665  |
| 34 | 1 | 0 | 0.546330  | -2.276886 | 3.374951  |
| 35 | 1 | 0 | -0.938343 | -1.949694 | 2.504285  |
| 36 | 1 | 0 | 1.089614  | 0.060992  | 3.557839  |
| 37 | 1 | 0 | -1.365136 | 0.828884  | 1.891116  |
| 38 | 1 | 0 | -0.121645 | 1.891213  | 2.566877  |

-----

Cartesian coordinate of SSS-inv-N\_c5:

-----

| Center | Atomic | Atomic | Coordinates (Angstroms) |   |   |
|--------|--------|--------|-------------------------|---|---|
| Number | Number | Type   | X                       | Y | Z |

-----

|    |   |   |           |           |           |
|----|---|---|-----------|-----------|-----------|
| 1  | 7 | 0 | -0.799377 | -2.453791 | -1.175322 |
| 2  | 6 | 0 | 0.674013  | -2.532776 | -1.137759 |
| 3  | 6 | 0 | 1.325270  | -1.165965 | -1.190404 |
| 4  | 6 | 0 | 0.681421  | -0.030744 | -0.690768 |
| 5  | 6 | 0 | -0.702046 | 0.166614  | -0.084069 |
| 6  | 6 | 0 | -1.713259 | -0.103125 | -1.237975 |
| 7  | 6 | 0 | -1.383638 | -1.405051 | -2.025959 |
| 8  | 8 | 0 | 0.329442  | 2.273451  | -0.632228 |
| 9  | 6 | 0 | 1.168759  | 1.238836  | -1.001314 |
| 10 | 6 | 0 | -0.532674 | 1.648307  | 0.348591  |
| 11 | 6 | 0 | 2.542332  | -0.967872 | -1.862583 |
| 12 | 6 | 0 | 3.075086  | 0.307052  | -2.075997 |
| 13 | 6 | 0 | 2.373139  | 1.444922  | -1.668674 |
| 14 | 6 | 0 | -1.130901 | -0.553451 | 1.217354  |
| 15 | 6 | 0 | -2.412335 | 0.106635  | 1.790671  |
| 16 | 6 | 0 | -2.366780 | 1.644954  | 1.937655  |
| 17 | 6 | 0 | -1.829795 | 2.351725  | 0.677665  |
| 18 | 8 | 0 | 2.846990  | 2.697570  | -1.941197 |
| 19 | 8 | 0 | -3.662507 | 2.180349  | 2.197204  |
| 20 | 1 | 0 | -1.170541 | -3.362987 | -1.430720 |
| 21 | 1 | 0 | 2.220499  | 3.334331  | -1.557642 |
| 22 | 1 | 0 | -3.996141 | 1.761604  | 3.006165  |
| 23 | 1 | 0 | 1.079762  | -3.121744 | -1.979175 |
| 24 | 1 | 0 | 0.953339  | -3.072985 | -0.220401 |
| 25 | 1 | 0 | -1.705756 | 0.738367  | -1.942697 |
| 26 | 1 | 0 | -2.731210 | -0.170415 | -0.841301 |
| 27 | 1 | 0 | -2.315751 | -1.794946 | -2.449859 |
| 28 | 1 | 0 | -0.732762 | -1.162854 | -2.879247 |
| 29 | 1 | 0 | 0.072750  | 1.617640  | 1.269778  |
| 30 | 1 | 0 | 3.078050  | -1.828837 | -2.255549 |
| 31 | 1 | 0 | 4.018416  | 0.436732  | -2.597668 |
| 32 | 1 | 0 | -0.316502 | -0.489406 | 1.951620  |

|    |   |   |           |           |           |
|----|---|---|-----------|-----------|-----------|
| 33 | 1 | 0 | -1.317147 | -1.611432 | 1.023030  |
| 34 | 1 | 0 | -2.634238 | -0.335606 | 2.772398  |
| 35 | 1 | 0 | -3.272425 | -0.126352 | 1.151472  |
| 36 | 1 | 0 | -1.686672 | 1.896969  | 2.770059  |
| 37 | 1 | 0 | -2.560143 | 2.275368  | -0.135017 |
| 38 | 1 | 0 | -1.674628 | 3.414797  | 0.891569  |

-----

Cartesian coordinate of SSS-inv-N\_c7:

| Center<br>Number | Atomic<br>Number | Atomic<br>Type | Coordinates (Angstroms) |           |           |
|------------------|------------------|----------------|-------------------------|-----------|-----------|
|                  |                  |                | X                       | Y         | Z         |
| 1                | 7                | 0              | -0.689371               | -2.449324 | -1.139560 |
| 2                | 6                | 0              | 0.784288                | -2.527438 | -1.097135 |
| 3                | 6                | 0              | 1.434808                | -1.160453 | -1.150957 |
| 4                | 6                | 0              | 0.791381                | -0.025874 | -0.649357 |
| 5                | 6                | 0              | -0.590673               | 0.169319  | -0.038783 |
| 6                | 6                | 0              | -1.604094               | -0.099834 | -1.191259 |
| 7                | 6                | 0              | -1.272413               | -1.397273 | -1.985855 |
| 8                | 8                | 0              | 0.438237                | 2.278000  | -0.586927 |
| 9                | 6                | 0              | 1.277569                | 1.244213  | -0.959194 |
| 10               | 6                | 0              | -0.421302               | 1.650547  | 0.395512  |
| 11               | 6                | 0              | 2.650385                | -0.961157 | -1.825361 |
| 12               | 6                | 0              | 3.182234                | 0.314228  | -2.038295 |
| 13               | 6                | 0              | 2.480855                | 1.451483  | -1.628251 |
| 14               | 6                | 0              | -1.015473               | -0.554938 | 1.262149  |
| 15               | 6                | 0              | -2.294181               | 0.098635  | 1.848306  |
| 16               | 6                | 0              | -2.253731               | 1.636341  | 1.999498  |
| 17               | 6                | 0              | -1.717903               | 2.350658  | 0.733485  |
| 18               | 8                | 0              | 2.954137                | 2.704327  | -1.900112 |
| 19               | 8                | 0              | -3.514842               | 2.152786  | 2.411764  |



|    |   |   |           |           |           |
|----|---|---|-----------|-----------|-----------|
| 20 | 1 | 0 | -1.059569 | -3.357656 | -1.399159 |
| 21 | 1 | 0 | 2.330955  | 3.340873  | -1.510882 |
| 22 | 1 | 0 | -4.162633 | 1.915283  | 1.728573  |
| 23 | 1 | 0 | 1.192501  | -3.118382 | -1.935764 |
| 24 | 1 | 0 | 1.060923  | -3.064983 | -0.177503 |
| 25 | 1 | 0 | -1.602960 | 0.744368  | -1.892995 |
| 26 | 1 | 0 | -2.620767 | -0.175444 | -0.791583 |
| 27 | 1 | 0 | -2.203644 | -1.785370 | -2.413449 |
| 28 | 1 | 0 | -0.620638 | -1.149167 | -2.836680 |
| 29 | 1 | 0 | 0.186041  | 1.619298  | 1.315316  |
| 30 | 1 | 0 | 3.185903  | -1.821488 | -2.219895 |
| 31 | 1 | 0 | 4.124727  | 0.444802  | -2.561224 |
| 32 | 1 | 0 | -0.198998 | -0.491594 | 1.993985  |
| 33 | 1 | 0 | -1.199279 | -1.612764 | 1.064705  |
| 34 | 1 | 0 | -2.517684 | -0.336327 | 2.829205  |
| 35 | 1 | 0 | -3.154211 | -0.149804 | 1.209038  |
| 36 | 1 | 0 | -1.579572 | 1.888084  | 2.827659  |
| 37 | 1 | 0 | -2.442264 | 2.278362  | -0.088346 |
| 38 | 1 | 0 | -1.565345 | 3.413252  | 0.951295  |

-----

Cartesian coordinate of SSS-inv-N\_c6:

-----

| Center | Atomic | Atomic | Coordinates (Angstroms) |   |   |
|--------|--------|--------|-------------------------|---|---|
| Number | Number | Type   | X                       | Y | Z |

-----

|   |   |   |           |           |           |
|---|---|---|-----------|-----------|-----------|
| 1 | 7 | 0 | -0.970691 | -2.446829 | -1.110043 |
| 2 | 6 | 0 | 0.501837  | -2.530250 | -1.072400 |
| 3 | 6 | 0 | 1.156980  | -1.165406 | -1.129462 |

|    |   |   |           |           |           |
|----|---|---|-----------|-----------|-----------|
| 4  | 6 | 0 | 0.515278  | -0.025884 | -0.636811 |
| 5  | 6 | 0 | -0.868721 | 0.178173  | -0.033020 |
| 6  | 6 | 0 | -1.879695 | -0.095066 | -1.186275 |
| 7  | 6 | 0 | -1.552627 | -1.402287 | -1.966732 |
| 8  | 8 | 0 | 0.171321  | 2.280351  | -0.589518 |
| 9  | 6 | 0 | 1.008260  | 1.240463  | -0.951900 |
| 10 | 6 | 0 | -0.695569 | 1.661262  | 0.391385  |
| 11 | 6 | 0 | 2.376578  | -0.974366 | -1.799171 |
| 12 | 6 | 0 | 2.914361  | 0.297596  | -2.017040 |
| 13 | 6 | 0 | 2.215029  | 1.439547  | -1.616796 |
| 14 | 6 | 0 | -1.302608 | -0.532516 | 1.272339  |
| 15 | 6 | 0 | -2.583275 | 0.126515  | 1.845352  |
| 16 | 6 | 0 | -2.535037 | 1.658545  | 1.985607  |
| 17 | 6 | 0 | -1.994757 | 2.362236  | 0.714919  |
| 18 | 8 | 0 | 2.693883  | 2.689619  | -1.893750 |
| 19 | 8 | 0 | -3.859477 | 2.076815  | 2.305573  |
| 20 | 1 | 0 | -1.346163 | -3.356719 | -1.356163 |
| 21 | 1 | 0 | 2.068510  | 3.329787  | -1.514255 |
| 22 | 1 | 0 | -3.835448 | 3.032353  | 2.471508  |
| 23 | 1 | 0 | 0.906284  | -3.123002 | -1.911930 |
| 24 | 1 | 0 | 0.779794  | -3.068023 | -0.153244 |

|    |   |   |           |           |           |
|----|---|---|-----------|-----------|-----------|
| 25 | 1 | 0 | -1.869956 | 0.742130  | -1.896280 |
| 26 | 1 | 0 | -2.897491 | -0.158281 | -0.788669 |
| 27 | 1 | 0 | -2.485533 | -1.792509 | -2.388496 |
| 28 | 1 | 0 | -0.901056 | -1.166342 | -2.821337 |
| 29 | 1 | 0 | -0.093787 | 1.634308  | 1.315137  |
| 30 | 1 | 0 | 2.910414  | -1.839001 | -2.186579 |
| 31 | 1 | 0 | 3.859589  | 0.421680  | -2.536626 |
| 32 | 1 | 0 | -0.487981 | -0.467246 | 2.006416  |
| 33 | 1 | 0 | -1.489979 | -1.591064 | 1.082826  |
| 34 | 1 | 0 | -2.810098 | -0.301370 | 2.828588  |
| 35 | 1 | 0 | -3.445408 | -0.108529 | 1.209836  |
| 36 | 1 | 0 | -1.853023 | 1.910847  | 2.816349  |
| 37 | 1 | 0 | -2.724346 | 2.279198  | -0.097722 |
| 38 | 1 | 0 | -1.832209 | 3.429819  | 0.915553  |

-----

## 5.2. Compounds **2** and **3**

### 5.2.1. SRRR configuration

| Conformer   | Population (%) |
|-------------|----------------|
| SRRR_c2.log | 34.0872        |
| SRRR_c1.log | 26.96617       |
| SRRR_c5.log | 23.34481       |
| SRRR_c3.log | 4.854899       |
| SRRR_c4.log | 4.422376       |
| SRRR_c0.log | 3.857006       |

|              |          |
|--------------|----------|
| SRRR_c12.log | 1.413027 |
| SRRR_c6.log  | 1.05451  |

Cartesian coordinate of SRRR\_c2:

| -----  |        |        |                         |           |           |  |
|--------|--------|--------|-------------------------|-----------|-----------|--|
| Center | Atomic | Atomic | Coordinates (Angstroms) |           |           |  |
| Number | Number | Type   | X                       | Y         | Z         |  |
| -----  |        |        |                         |           |           |  |
| 1      | 6      | 0      | 2.273749                | -1.950178 | -0.703234 |  |
| 2      | 6      | 0      | 3.829183                | -1.994523 | -0.607393 |  |
| 3      | 6      | 0      | 4.515418                | -0.648928 | -0.588582 |  |
| 4      | 6      | 0      | 3.826971                | 0.488170  | -0.484744 |  |
| 5      | 6      | 0      | 2.327268                | 0.484978  | -0.460169 |  |
| 6      | 7      | 0      | 1.992641                | 1.667163  | 0.319746  |  |
| 7      | 6      | 0      | 0.581758                | 1.984389  | 0.187345  |  |
| 8      | 6      | 0      | -0.295192               | 0.741833  | 0.313968  |  |
| 9      | 6      | 0      | -1.676977               | 0.944812  | 0.465670  |  |
| 10     | 6      | 0      | -2.550170               | -0.131625 | 0.540371  |  |
| 11     | 6      | 0      | -2.047807               | -1.444386 | 0.466196  |  |
| 12     | 6      | 0      | -0.683398               | -1.651566 | 0.324463  |  |
| 13     | 6      | 0      | 0.210526                | -0.570678 | 0.239383  |  |
| 14     | 6      | 0      | 1.719583                | -0.776487 | 0.139411  |  |
| 15     | 6      | 0      | 4.278224                | 1.922057  | -0.265412 |  |
| 16     | 6      | 0      | 2.941842                | 2.694745  | -0.110773 |  |
| 17     | 8      | 0      | 1.776637                | -3.232117 | -0.359026 |  |
| 18     | 8      | 0      | 4.115715                | -2.693727 | 0.633631  |  |
| 19     | 8      | 0      | -2.900445               | -2.508550 | 0.540646  |  |
| 20     | 8      | 0      | -3.917941               | -0.062395 | 0.689775  |  |
| 21     | 6      | 0      | -4.516312               | 1.219497  | 0.777512  |  |
| 22     | 1      | 0      | 2.341583                | -3.522449 | 0.381742  |  |
| 23     | 1      | 0      | 4.958836                | -3.159213 | 0.534097  |  |
| 24     | 1      | 0      | -3.796540               | -2.142890 | 0.639483  |  |
| 25     | 1      | 0      | 1.997468                | -1.786570 | -1.752599 |  |

|    |   |   |           |           |           |
|----|---|---|-----------|-----------|-----------|
| 26 | 1 | 0 | 4.191166  | -2.612489 | -1.441480 |
| 27 | 1 | 0 | 5.605612  | -0.658335 | -0.579212 |
| 28 | 1 | 0 | 1.948060  | 0.588326  | -1.504723 |
| 29 | 1 | 0 | 0.378250  | 2.465036  | -0.795652 |
| 30 | 1 | 0 | 0.302127  | 2.720026  | 0.953537  |
| 31 | 1 | 0 | -2.056702 | 1.960806  | 0.522626  |
| 32 | 1 | 0 | -0.310814 | -2.666677 | 0.266718  |
| 33 | 1 | 0 | 2.126888  | -0.881193 | 1.155561  |
| 34 | 1 | 0 | 4.882306  | 2.314670  | -1.091152 |
| 35 | 1 | 0 | 4.884778  | 1.993818  | 0.644778  |
| 36 | 1 | 0 | 2.996893  | 3.509297  | 0.619779  |
| 37 | 1 | 0 | 2.646203  | 3.137426  | -1.083467 |
| 38 | 1 | 0 | -4.336015 | 1.807632  | -0.131962 |
| 39 | 1 | 0 | -4.142116 | 1.776296  | 1.646652  |
| 40 | 1 | 0 | -5.588440 | 1.048040  | 0.891333  |

-----

Cartesian coordinate of SRRR\_c1:

-----

| Center | Atomic | Atomic | Coordinates (Angstroms) |           |           |
|--------|--------|--------|-------------------------|-----------|-----------|
| Number | Number | Type   | X                       | Y         | Z         |
| -----  |        |        |                         |           |           |
| 1      | 6      | 0      | 2.250938                | -1.968897 | -0.375670 |
| 2      | 6      | 0      | 3.815541                | -2.021806 | -0.252534 |
| 3      | 6      | 0      | 4.513517                | -0.686312 | -0.214429 |
| 4      | 6      | 0      | 3.842988                | 0.464963  | -0.243187 |
| 5      | 6      | 0      | 2.347051                | 0.486194  | -0.339589 |
| 6      | 7      | 0      | 1.978587                | 1.726421  | 0.327173  |
| 7      | 6      | 0      | 0.589147                | 2.057102  | 0.070516  |
| 8      | 6      | 0      | -0.319758               | 0.841376  | 0.224585  |
| 9      | 6      | 0      | -1.704655               | 1.075136  | 0.253940  |
| 10     | 6      | 0      | -2.603068               | 0.020673  | 0.341311  |

|    |   |   |           |           |           |
|----|---|---|-----------|-----------|-----------|
| 11 | 6 | 0 | -2.123040 | -1.300988 | 0.402455  |
| 12 | 6 | 0 | -0.756206 | -1.537707 | 0.381459  |
| 13 | 6 | 0 | 0.164322  | -0.479872 | 0.287978  |
| 14 | 6 | 0 | 1.673760  | -0.714068 | 0.312513  |
| 15 | 6 | 0 | 4.307566  | 1.902007  | -0.080174 |
| 16 | 6 | 0 | 2.981413  | 2.706207  | -0.091898 |
| 17 | 8 | 0 | 1.737886  | -3.198484 | 0.125374  |
| 18 | 8 | 0 | 4.172149  | -2.706505 | 0.971594  |
| 19 | 8 | 0 | -2.999381 | -2.344606 | 0.488290  |
| 20 | 8 | 0 | -3.976069 | 0.120614  | 0.379699  |
| 21 | 6 | 0 | -4.553906 | 1.414094  | 0.325241  |
| 22 | 1 | 0 | 2.102441  | -3.265054 | 1.026209  |
| 23 | 1 | 0 | 4.224391  | -3.651465 | 0.759468  |
| 24 | 1 | 0 | -3.893239 | -1.960463 | 0.490483  |
| 25 | 1 | 0 | 1.979502  | -1.950201 | -1.437591 |
| 26 | 1 | 0 | 4.190796  | -2.617230 | -1.098081 |
| 27 | 1 | 0 | 5.595601  | -0.722417 | -0.101225 |
| 28 | 1 | 0 | 2.046476  | 0.513978  | -1.413650 |
| 29 | 1 | 0 | 0.464571  | 2.466713  | -0.956805 |
| 30 | 1 | 0 | 0.272282  | 2.851817  | 0.759372  |
| 31 | 1 | 0 | -2.066610 | 2.097971  | 0.204755  |
| 32 | 1 | 0 | -0.404309 | -2.560872 | 0.426316  |
| 33 | 1 | 0 | 2.010699  | -0.733418 | 1.360501  |
| 34 | 1 | 0 | 4.987891  | 2.226783  | -0.875436 |
| 35 | 1 | 0 | 4.836850  | 2.024864  | 0.871726  |
| 36 | 1 | 0 | 2.993422  | 3.568213  | 0.584156  |
| 37 | 1 | 0 | 2.776527  | 3.085326  | -1.113539 |
| 38 | 1 | 0 | -4.293939 | 1.928509  | -0.609216 |
| 39 | 1 | 0 | -4.235157 | 2.029770  | 1.176505  |
| 40 | 1 | 0 | -5.634674 | 1.266732  | 0.369144  |

---

Cartesian coordinate of SRRR\_c5:

| -----  |        |        |                         |           |           |  |
|--------|--------|--------|-------------------------|-----------|-----------|--|
| Center | Atomic | Atomic | Coordinates (Angstroms) |           |           |  |
| Number | Number | Type   | X                       | Y         | Z         |  |
| -----  |        |        |                         |           |           |  |
| 1      | 6      | 0      | 2.199185                | -1.921732 | -0.855277 |  |
| 2      | 6      | 0      | 3.754115                | -1.980004 | -0.783554 |  |
| 3      | 6      | 0      | 4.436944                | -0.638214 | -0.803707 |  |
| 4      | 6      | 0      | 3.752706                | 0.508500  | -0.756779 |  |
| 5      | 6      | 0      | 2.245502                | 0.541829  | -0.736472 |  |
| 6      | 7      | 0      | 1.904124                | 1.827054  | -0.094785 |  |
| 7      | 6      | 0      | 0.791840                | 1.773388  | 0.855313  |  |
| 8      | 6      | 0      | -0.257998               | 0.759034  | 0.451960  |  |
| 9      | 6      | 0      | -1.623153               | 1.060985  | 0.532364  |  |
| 10     | 6      | 0      | -2.570325               | 0.095385  | 0.205776  |  |
| 11     | 6      | 0      | -2.156930               | -1.184536 | -0.208985 |  |
| 12     | 6      | 0      | -0.801283               | -1.485053 | -0.294137 |  |
| 13     | 6      | 0      | 0.156148                | -0.518057 | 0.034673  |  |
| 14     | 6      | 0      | 1.658136                | -0.716310 | -0.059528 |  |
| 15     | 6      | 0      | 4.233351                | 1.917276  | -0.526025 |  |
| 16     | 6      | 0      | 3.131170                | 2.445096  | 0.414924  |  |
| 17     | 8      | 0      | 1.689484                | -3.174914 | -0.437399 |  |
| 18     | 8      | 0      | 4.140953                | -2.696191 | 0.416521  |  |
| 19     | 8      | 0      | -3.085908               | -2.131035 | -0.530069 |  |
| 20     | 8      | 0      | -3.938164               | 0.255702  | 0.238918  |  |
| 21     | 6      | 0      | -4.454358               | 1.514034  | 0.639180  |  |
| 22     | 1      | 0      | 2.315929                | -3.484906 | 0.244348  |  |
| 23     | 1      | 0      | 4.142370                | -2.048708 | 1.141105  |  |
| 24     | 1      | 0      | -3.959440               | -1.721181 | -0.404569 |  |
| 25     | 1      | 0      | 1.903002                | -1.795321 | -1.905313 |  |
| 26     | 1      | 0      | 4.107323                | -2.628764 | -1.592510 |  |
| 27     | 1      | 0      | 5.525608                | -0.650279 | -0.766650 |  |

|    |   |   |           |           |           |
|----|---|---|-----------|-----------|-----------|
| 28 | 1 | 0 | 1.853585  | 0.547786  | -1.767759 |
| 29 | 1 | 0 | 0.341634  | 2.771399  | 0.941313  |
| 30 | 1 | 0 | 1.165954  | 1.518900  | 1.870546  |
| 31 | 1 | 0 | -1.932409 | 2.052639  | 0.847264  |
| 32 | 1 | 0 | -0.503300 | -2.481105 | -0.597992 |
| 33 | 1 | 0 | 2.069490  | -0.774227 | 0.963392  |
| 34 | 1 | 0 | 4.226602  | 2.489959  | -1.463323 |
| 35 | 1 | 0 | 5.237455  | 1.976339  | -0.095744 |
| 36 | 1 | 0 | 3.350986  | 2.138692  | 1.457319  |
| 37 | 1 | 0 | 3.049497  | 3.539053  | 0.406670  |
| 38 | 1 | 0 | -4.126629 | 2.313692  | -0.037915 |
| 39 | 1 | 0 | -4.150575 | 1.762378  | 1.664603  |
| 40 | 1 | 0 | -5.541442 | 1.424765  | 0.595109  |

-----

Cartesian coordinate of SRRR\_c3:

-----

| Center | Atomic | Atomic | Coordinates (Angstroms) |           |           |
|--------|--------|--------|-------------------------|-----------|-----------|
| Number | Number | Type   | X                       | Y         | Z         |
| -----  |        |        |                         |           |           |
| 1      | 6      | 0      | 2.218671                | -1.978267 | -0.870474 |
| 2      | 6      | 0      | 3.770300                | -2.024407 | -0.800601 |
| 3      | 6      | 0      | 4.438149                | -0.673002 | -0.825717 |
| 4      | 6      | 0      | 3.744687                | 0.465626  | -0.776127 |
| 5      | 6      | 0      | 2.237555                | 0.482697  | -0.732841 |
| 6      | 7      | 0      | 1.893926                | 1.758190  | -0.071884 |
| 7      | 6      | 0      | 0.801544                | 1.679802  | 0.899391  |
| 8      | 6      | 0      | -0.246547               | 0.662493  | 0.499416  |
| 9      | 6      | 0      | -1.612573               | 0.952606  | 0.603022  |
| 10     | 6      | 0      | -2.557101               | -0.015299 | 0.275436  |
| 11     | 6      | 0      | -2.139611               | -1.285045 | -0.164110 |
| 12     | 6      | 0      | -0.782926               | -1.573795 | -0.272006 |



|    |   |   |           |           |           |
|----|---|---|-----------|-----------|-----------|
| 13 | 6 | 0 | 0.172553  | -0.605352 | 0.058522  |
| 14 | 6 | 0 | 1.675735  | -0.787342 | -0.054996 |
| 15 | 6 | 0 | 4.214427  | 1.877638  | -0.542286 |
| 16 | 6 | 0 | 3.123836  | 2.382969  | 0.424015  |
| 17 | 8 | 0 | 1.714521  | -3.244325 | -0.483665 |
| 18 | 8 | 0 | 4.084029  | -2.682993 | 0.456610  |
| 19 | 8 | 0 | -3.066240 | -2.234337 | -0.487086 |
| 20 | 8 | 0 | -3.926271 | 0.134150  | 0.330054  |
| 21 | 6 | 0 | -4.445077 | 1.381698  | 0.758504  |
| 22 | 1 | 0 | 2.270867  | -3.509879 | 0.272086  |
| 23 | 1 | 0 | 4.887767  | -3.208228 | 0.333004  |
| 24 | 1 | 0 | -3.940480 | -1.832423 | -0.342514 |
| 25 | 1 | 0 | 1.924500  | -1.839199 | -1.918821 |
| 26 | 1 | 0 | 4.122550  | -2.663959 | -1.622059 |
| 27 | 1 | 0 | 5.527654  | -0.666887 | -0.792256 |
| 28 | 1 | 0 | 1.825741  | 0.496619  | -1.756590 |
| 29 | 1 | 0 | 0.344055  | 2.672250  | 1.009623  |
| 30 | 1 | 0 | 1.197449  | 1.412097  | 1.902517  |
| 31 | 1 | 0 | -1.924582 | 1.937341  | 0.936486  |
| 32 | 1 | 0 | -0.481851 | -2.562815 | -0.594880 |
| 33 | 1 | 0 | 2.107957  | -0.852206 | 0.956190  |
| 34 | 1 | 0 | 4.185228  | 2.461301  | -1.472526 |
| 35 | 1 | 0 | 5.224593  | 1.942710  | -0.127237 |
| 36 | 1 | 0 | 3.365252  | 2.065750  | 1.457700  |
| 37 | 1 | 0 | 3.030021  | 3.476185  | 0.429572  |
| 38 | 1 | 0 | -4.133277 | 2.194957  | 0.090056  |
| 39 | 1 | 0 | -4.127632 | 1.615784  | 1.783193  |
| 40 | 1 | 0 | -5.532160 | 1.285552  | 0.729284  |

-----

Cartesian coordinate of SRRR\_c4:

-----

| Center | Atomic | Atomic | Coordinates (Angstroms) |           |           |
|--------|--------|--------|-------------------------|-----------|-----------|
| Number | Number | Type   | X                       | Y         | Z         |
| -----  |        |        |                         |           |           |
| 1      | 6      | 0      | 2.295389                | -1.723759 | -0.514313 |
| 2      | 6      | 0      | 3.848309                | -1.790276 | -0.350385 |
| 3      | 6      | 0      | 4.538292                | -0.446107 | -0.356449 |
| 4      | 6      | 0      | 3.850929                | 0.694502  | -0.333954 |
| 5      | 6      | 0      | 2.350079                | 0.698395  | -0.364200 |
| 6      | 7      | 0      | 1.992008                | 1.910034  | 0.355990  |
| 7      | 6      | 0      | 0.591292                | 2.229432  | 0.151413  |
| 8      | 6      | 0      | -0.298226               | 0.999098  | 0.300609  |
| 9      | 6      | 0      | -1.682980               | 1.217640  | 0.392842  |
| 10     | 6      | 0      | -2.567862               | 0.152950  | 0.491881  |
| 11     | 6      | 0      | -2.072619               | -1.164142 | 0.509224  |
| 12     | 6      | 0      | -0.705718               | -1.385482 | 0.428464  |
| 13     | 6      | 0      | 0.201024                | -0.318130 | 0.310302  |
| 14     | 6      | 0      | 1.712637                | -0.536126 | 0.267348  |
| 15     | 6      | 0      | 4.300817                | 2.134717  | -0.154311 |
| 16     | 6      | 0      | 2.964261                | 2.917431  | -0.073625 |
| 17     | 8      | 0      | 1.766475                | -2.975214 | -0.036519 |
| 18     | 8      | 0      | 4.171137                | -2.414872 | 0.889493  |
| 19     | 8      | 0      | -2.933647               | -2.219334 | 0.612589  |
| 20     | 8      | 0      | -3.938774               | 0.237625  | 0.587293  |
| 21     | 6      | 0      | -4.529568               | 1.526665  | 0.601544  |
| 22     | 1      | 0      | 1.826869                | -3.619193 | -0.759371 |
| 23     | 1      | 0      | 3.479285                | -3.092037 | 1.011092  |
| 24     | 1      | 0      | -3.829763               | -1.844844 | 0.670629  |
| 25     | 1      | 0      | 2.045725                | -1.606521 | -1.578460 |
| 26     | 1      | 0      | 4.234762                | -2.411012 | -1.181972 |
| 27     | 1      | 0      | 5.624223                | -0.467843 | -0.285133 |
| 28     | 1      | 0      | 2.003677                | 0.762147  | -1.423439 |
| 29     | 1      | 0      | 0.430620                | 2.665187  | -0.860190 |

|    |   |   |           |           |           |
|----|---|---|-----------|-----------|-----------|
| 30 | 1 | 0 | 0.285405  | 3.000491  | 0.871189  |
| 31 | 1 | 0 | -2.055477 | 2.237790  | 0.384822  |
| 32 | 1 | 0 | -0.343827 | -2.404830 | 0.458901  |
| 33 | 1 | 0 | 2.092783  | -0.610676 | 1.295410  |
| 34 | 1 | 0 | 4.931894  | 2.494897  | -0.974617 |
| 35 | 1 | 0 | 4.878311  | 2.239516  | 0.771176  |
| 36 | 1 | 0 | 2.996156  | 3.755529  | 0.631156  |
| 37 | 1 | 0 | 2.705097  | 3.328596  | -1.070193 |
| 38 | 1 | 0 | -4.316082 | 2.073705  | -0.326075 |
| 39 | 1 | 0 | -4.178071 | 2.117044  | 1.457705  |
| 40 | 1 | 0 | -5.605945 | 1.367028  | 0.688384  |

-----

Cartesian coordinate of SRRR\_c0:

-----

| Center | Atomic | Atomic | Coordinates (Angstroms) |           |           |
|--------|--------|--------|-------------------------|-----------|-----------|
| Number | Number | Type   | X                       | Y         | Z         |
| -----  |        |        |                         |           |           |
| 1      | 6      | 0      | 2.149981                | -2.017358 | -0.812036 |
| 2      | 6      | 0      | 3.707658                | -2.102536 | -0.724410 |
| 3      | 6      | 0      | 4.406838                | -0.770757 | -0.677516 |
| 4      | 6      | 0      | 3.747074                | 0.387897  | -0.690370 |
| 5      | 6      | 0      | 2.241747                | 0.450691  | -0.739423 |
| 6      | 7      | 0      | 1.898773                | 1.746739  | -0.119033 |
| 7      | 6      | 0      | 0.752704                | 1.722069  | 0.790911  |
| 8      | 6      | 0      | -0.301079               | 0.724858  | 0.358396  |
| 9      | 6      | 0      | -1.662108               | 1.053547  | 0.382906  |
| 10     | 6      | 0      | -2.615125               | 0.105160  | 0.024271  |
| 11     | 6      | 0      | -2.210673               | -1.183835 | -0.369319 |
| 12     | 6      | 0      | -0.858666               | -1.510396 | -0.399418 |
| 13     | 6      | 0      | 0.105096                | -0.562394 | -0.034539 |
| 14     | 6      | 0      | 1.607218                | -0.787597 | -0.066900 |

|    |   |   |           |           |           |
|----|---|---|-----------|-----------|-----------|
| 15 | 6 | 0 | 4.247162  | 1.788082  | -0.449737 |
| 16 | 6 | 0 | 3.116307  | 2.346857  | 0.436375  |
| 17 | 8 | 0 | 1.609455  | -3.255668 | -0.355317 |
| 18 | 8 | 0 | 4.084145  | -2.804972 | 0.477791  |
| 19 | 8 | 0 | -3.144192 | -2.114280 | -0.724174 |
| 20 | 8 | 0 | -3.979902 | 0.292079  | 0.003245  |
| 21 | 6 | 0 | -4.486189 | 1.563080  | 0.375673  |
| 22 | 1 | 0 | 1.844070  | -3.307270 | 0.586963  |
| 23 | 1 | 0 | 3.971488  | -3.749606 | 0.285827  |
| 24 | 1 | 0 | -4.013705 | -1.686394 | -0.636329 |
| 25 | 1 | 0 | 1.856446  | -1.949097 | -1.866231 |
| 26 | 1 | 0 | 4.059371  | -2.685444 | -1.589748 |
| 27 | 1 | 0 | 5.488818  | -0.806639 | -0.564213 |
| 28 | 1 | 0 | 1.886835  | 0.455480  | -1.784118 |
| 29 | 1 | 0 | 0.318507  | 2.729062  | 0.853047  |
| 30 | 1 | 0 | 1.084731  | 1.468808  | 1.820675  |
| 31 | 1 | 0 | -1.963420 | 2.053222  | 0.679582  |
| 32 | 1 | 0 | -0.570303 | -2.512781 | -0.691956 |
| 33 | 1 | 0 | 1.990044  | -0.834505 | 0.966457  |
| 34 | 1 | 0 | 4.297897  | 2.354875  | -1.389491 |
| 35 | 1 | 0 | 5.230419  | 1.827164  | 0.028120  |
| 36 | 1 | 0 | 3.284510  | 2.046814  | 1.489326  |
| 37 | 1 | 0 | 3.054529  | 3.442105  | 0.413104  |
| 38 | 1 | 0 | -4.116530 | 2.351545  | -0.292825 |
| 39 | 1 | 0 | -4.217526 | 1.812164  | 1.410629  |
| 40 | 1 | 0 | -5.572305 | 1.494861  | 0.289799  |

-----

Cartesian coordinate of SRRR\_c12:

-----

| Center | Atomic | Atomic | Coordinates (Angstroms) |   |   |
|--------|--------|--------|-------------------------|---|---|
| Number | Number | Type   | X                       | Y | Z |

---

|    |   |   |           |           |           |
|----|---|---|-----------|-----------|-----------|
| 1  | 6 | 0 | 2.242151  | -1.894477 | -0.726611 |
| 2  | 6 | 0 | 3.802327  | -1.945299 | -0.650941 |
| 3  | 6 | 0 | 4.497408  | -0.606691 | -0.620198 |
| 4  | 6 | 0 | 3.814889  | 0.534201  | -0.492429 |
| 5  | 6 | 0 | 2.315391  | 0.541820  | -0.463535 |
| 6  | 7 | 0 | 1.990845  | 1.715434  | 0.333081  |
| 7  | 6 | 0 | 0.579669  | 2.044837  | 0.213353  |
| 8  | 6 | 0 | -0.305169 | 0.806104  | 0.318349  |
| 9  | 6 | 0 | -1.687504 | 1.008476  | 0.466852  |
| 10 | 6 | 0 | -2.583388 | -0.055256 | 0.521741  |
| 11 | 6 | 0 | -2.078964 | -1.370313 | 0.426414  |
| 12 | 6 | 0 | -0.712814 | -1.574960 | 0.290344  |
| 13 | 6 | 0 | 0.194070  | -0.503406 | 0.225423  |
| 14 | 6 | 0 | 1.698788  | -0.721409 | 0.120953  |
| 15 | 6 | 0 | 4.275924  | 1.962898  | -0.261178 |
| 16 | 6 | 0 | 2.945326  | 2.742557  | -0.088834 |
| 17 | 8 | 0 | 1.751020  | -3.172806 | -0.353835 |
| 18 | 8 | 0 | 4.185022  | -2.709617 | 0.521186  |
| 19 | 8 | 0 | -2.984015 | -2.394613 | 0.480928  |
| 20 | 8 | 0 | -3.935961 | 0.055642  | 0.664392  |
| 21 | 6 | 0 | -4.486838 | 1.355864  | 0.764202  |
| 22 | 1 | 0 | 2.393418  | -3.496823 | 0.307670  |
| 23 | 1 | 0 | 4.183446  | -2.090508 | 1.270357  |
| 24 | 1 | 0 | -2.494455 | -3.227493 | 0.392722  |
| 25 | 1 | 0 | 1.945821  | -1.735634 | -1.771655 |
| 26 | 1 | 0 | 4.157550  | -2.561831 | -1.483885 |
| 27 | 1 | 0 | 5.586408  | -0.630908 | -0.621674 |
| 28 | 1 | 0 | 1.936981  | 0.657925  | -1.506369 |
| 29 | 1 | 0 | 0.375591  | 2.546462  | -0.758268 |
| 30 | 1 | 0 | 0.309331  | 2.766522  | 0.995697  |
| 31 | 1 | 0 | -2.058679 | 2.026184  | 0.537235  |

|    |   |   |           |           |           |
|----|---|---|-----------|-----------|-----------|
| 32 | 1 | 0 | -0.327063 | -2.587870 | 0.219158  |
| 33 | 1 | 0 | 2.101411  | -0.833920 | 1.140844  |
| 34 | 1 | 0 | 4.876349  | 2.357622  | -1.088323 |
| 35 | 1 | 0 | 4.891575  | 2.022872  | 0.643773  |
| 36 | 1 | 0 | 3.010203  | 3.546349  | 0.652499  |
| 37 | 1 | 0 | 2.647947  | 3.200385  | -1.053431 |
| 38 | 1 | 0 | -4.285503 | 1.952560  | -0.136299 |
| 39 | 1 | 0 | -4.102945 | 1.893427  | 1.642307  |
| 40 | 1 | 0 | -5.564466 | 1.216831  | 0.870201  |

-----

Cartesian coordinate of SRRR\_c6:

-----

| Center | Atomic | Atomic | Coordinates (Angstroms) |           |           |
|--------|--------|--------|-------------------------|-----------|-----------|
| Number | Number | Type   | X                       | Y         | Z         |
| -----  |        |        |                         |           |           |
| 1      | 6      | 0      | 2.380734                | -1.943152 | -0.578234 |
| 2      | 6      | 0      | 3.943210                | -1.952657 | -0.608427 |
| 3      | 6      | 0      | 4.601739                | -0.597608 | -0.682113 |
| 4      | 6      | 0      | 3.898919                | 0.531140  | -0.556535 |
| 5      | 6      | 0      | 2.405014                | 0.505034  | -0.425145 |
| 6      | 7      | 0      | 2.104792                | 1.703444  | 0.343148  |
| 7      | 6      | 0      | 0.680667                | 1.995748  | 0.307644  |
| 8      | 6      | 0      | -0.163024               | 0.743004  | 0.523856  |
| 9      | 6      | 0      | -1.534714               | 0.906732  | 0.749354  |
| 10     | 6      | 0      | -2.396036               | -0.173139 | 0.914920  |
| 11     | 6      | 0      | -1.863501               | -1.474367 | 0.856773  |
| 12     | 6      | 0      | -0.501378               | -1.651148 | 0.626638  |
| 13     | 6      | 0      | 0.364060                | -0.562313 | 0.451885  |
| 14     | 6      | 0      | 1.864096                | -0.746453 | 0.252902  |
| 15     | 6      | 0      | 4.336898                | 1.978862  | -0.417600 |
| 16     | 6      | 0      | 3.001568                | 2.733982  | -0.184274 |

|    |   |   |           |           |           |
|----|---|---|-----------|-----------|-----------|
| 17 | 8 | 0 | 1.951013  | -3.214802 | -0.116940 |
| 18 | 8 | 0 | 4.424558  | -2.655408 | 0.565763  |
| 19 | 8 | 0 | -2.716641 | -2.531318 | 1.048115  |
| 20 | 8 | 0 | -3.717381 | 0.073476  | 1.200159  |
| 21 | 6 | 0 | -4.666145 | -0.404363 | 0.243757  |
| 22 | 1 | 0 | 2.646670  | -3.493429 | 0.510694  |
| 23 | 1 | 0 | 4.461637  | -2.003512 | 1.285638  |
| 24 | 1 | 0 | -2.201040 | -3.350281 | 0.979001  |
| 25 | 1 | 0 | 2.009825  | -1.838908 | -1.606197 |
| 26 | 1 | 0 | 4.257516  | -2.596411 | -1.437217 |
| 27 | 1 | 0 | 5.688415  | -0.595439 | -0.756926 |
| 28 | 1 | 0 | 1.953917  | 0.566882  | -1.443538 |
| 29 | 1 | 0 | 0.398441  | 2.450352  | -0.667188 |
| 30 | 1 | 0 | 0.444321  | 2.742691  | 1.076602  |
| 31 | 1 | 0 | -1.968318 | 1.902238  | 0.807866  |
| 32 | 1 | 0 | -0.089544 | -2.655452 | 0.580009  |
| 33 | 1 | 0 | 2.335442  | -0.802493 | 1.247440  |
| 34 | 1 | 0 | 4.867720  | 2.351309  | -1.300770 |
| 35 | 1 | 0 | 5.012405  | 2.092005  | 0.438201  |
| 36 | 1 | 0 | 3.095992  | 3.568723  | 0.518558  |
| 37 | 1 | 0 | 2.626963  | 3.144725  | -1.143055 |
| 38 | 1 | 0 | -4.474188 | 0.030361  | -0.746794 |
| 39 | 1 | 0 | -5.644018 | -0.070976 | 0.599422  |
| 40 | 1 | 0 | -4.653112 | -1.495878 | 0.172732  |

-----

### 5.2.2. SRRS configuration

| Conformer   | Population (%) |
|-------------|----------------|
| SRRS_c0.log | 100            |

Cartesian coordinate of SRRS\_c0:

-----

| Center | Atomic | Atomic | Coordinates (Angstroms) |           |           |
|--------|--------|--------|-------------------------|-----------|-----------|
| Number | Number | Type   | X                       | Y         | Z         |
| -----  |        |        |                         |           |           |
| 1      | 6      | 0      | 2.251758                | -0.642654 | -0.222748 |
| 2      | 6      | 0      | 3.230219                | -1.828238 | -0.028887 |
| 3      | 6      | 0      | 2.454650                | -3.127522 | 0.082956  |
| 4      | 6      | 0      | 1.193959                | -3.165102 | 0.519913  |
| 5      | 6      | 0      | 0.441277                | -1.939153 | 0.972767  |
| 6      | 7      | 0      | -0.683967               | -1.979566 | 0.019726  |
| 7      | 6      | 0      | -1.713100               | -0.997533 | 0.325632  |
| 8      | 6      | 0      | -1.116179               | 0.384784  | 0.517300  |
| 9      | 6      | 0      | -1.965956               | 1.503246  | 0.435799  |
| 10     | 6      | 0      | -1.474388               | 2.784406  | 0.653507  |
| 11     | 6      | 0      | -0.110841               | 2.967781  | 0.961427  |
| 12     | 6      | 0      | 0.725647                | 1.865461  | 1.038440  |
| 13     | 6      | 0      | 0.240660                | 0.565226  | 0.814603  |
| 14     | 6      | 0      | 1.203282                | -0.611121 | 0.906574  |
| 15     | 6      | 0      | 0.142099                | -4.233301 | 0.313783  |
| 16     | 6      | 0      | -1.137898               | -3.387563 | 0.015022  |
| 17     | 8      | 0      | 1.658962                | -0.727465 | -1.520908 |
| 18     | 8      | 0      | 4.129912                | -1.886258 | -1.132806 |
| 19     | 8      | 0      | 0.385620                | 4.220285  | 1.184333  |
| 20     | 8      | 0      | -2.199565               | 3.951769  | 0.600648  |
| 21     | 6      | 0      | -3.583642               | 3.877520  | 0.277963  |
| 22     | 1      | 0      | 0.068898                | -2.086217 | 2.009556  |
| 23     | 1      | 0      | 1.771106                | -0.513161 | 1.842537  |
| 24     | 1      | 0      | 2.835110                | 0.284208  | -0.220064 |
| 25     | 1      | 0      | 3.856810                | -1.644194 | 0.853675  |
| 26     | 1      | 0      | 2.933784                | -4.007855 | -0.341456 |
| 27     | 1      | 0      | -2.267538               | -1.288921 | 1.242985  |
| 28     | 1      | 0      | -2.443760               | -0.982919 | -0.492295 |
| 29     | 1      | 0      | -3.014311               | 1.352825  | 0.198677  |



|    |   |   |           |           |           |
|----|---|---|-----------|-----------|-----------|
| 30 | 1 | 0 | 1.771986  | 2.033984  | 1.276570  |
| 31 | 1 | 0 | -0.010936 | -4.841943 | 1.212820  |
| 32 | 1 | 0 | 0.402446  | -4.909783 | -0.504330 |
| 33 | 1 | 0 | -1.596328 | -3.633220 | -0.948111 |
| 34 | 1 | 0 | -1.897162 | -3.550381 | 0.799464  |
| 35 | 1 | 0 | 0.822528  | -1.222028 | -1.439797 |
| 36 | 1 | 0 | 3.588392  | -1.729504 | -1.924275 |
| 37 | 1 | 0 | -0.340354 | 4.854535  | 1.080956  |
| 38 | 1 | 0 | -3.949039 | 4.904988  | 0.283684  |
| 39 | 1 | 0 | -3.733152 | 3.440805  | -0.716861 |
| 40 | 1 | 0 | -4.131785 | 3.289980  | 1.024519  |

### 5.2.3. SRSR configuration

| Conformer   | Population (%) |
|-------------|----------------|
| SRSR_c1.log | 29.414         |
| SRSR_c2.log | 26.148         |
| SRSR_c0.log | 25.872         |
| SRSR_c3.log | 18.565         |

Cartesian coordinate of SRSR\_c1:

| Center<br>Number | Atomic<br>Number | Atomic<br>Type | Coordinates (Angstroms) |           |           |
|------------------|------------------|----------------|-------------------------|-----------|-----------|
|                  |                  |                | X                       | Y         | Z         |
| 1                | 6                | 0              | -0.760458               | -1.400331 | 3.257812  |
| 2                | 6                | 0              | 0.782924                | -1.424850 | 3.236894  |
| 3                | 6                | 0              | 1.389003                | -0.049204 | 3.238216  |
| 4                | 6                | 0              | 0.664749                | 1.031137  | 2.947949  |
| 5                | 6                | 0              | -0.803466               | 0.991957  | 2.555899  |
| 6                | 7                | 0              | -0.894715               | 1.974395  | 1.452421  |
| 7                | 6                | 0              | -0.282903               | 1.462632  | 0.215043  |
| 8                | 6                | 0              | -0.775598               | 0.086137  | -0.166977 |

|    |   |   |           |           |           |
|----|---|---|-----------|-----------|-----------|
| 9  | 6 | 0 | -0.722022 | -0.300378 | -1.517756 |
| 10 | 6 | 0 | -1.124243 | -1.569758 | -1.907743 |
| 11 | 6 | 0 | -1.608836 | -2.476327 | -0.943643 |
| 12 | 6 | 0 | -1.671095 | -2.089079 | 0.385917  |
| 13 | 6 | 0 | -1.240503 | -0.814004 | 0.796214  |
| 14 | 6 | 0 | -1.375313 | -0.400035 | 2.253292  |
| 15 | 6 | 0 | 1.109317  | 2.469631  | 2.765854  |
| 16 | 6 | 0 | -0.093126 | 3.097739  | 1.981616  |
| 17 | 8 | 0 | -1.210561 | -1.028672 | 4.552332  |
| 18 | 8 | 0 | 1.250797  | -2.108677 | 4.421070  |
| 19 | 8 | 0 | -2.025104 | -3.720396 | -1.319358 |
| 20 | 8 | 0 | -1.122109 | -2.070018 | -3.189553 |
| 21 | 6 | 0 | -0.683251 | -1.220767 | -4.237865 |
| 22 | 1 | 0 | -0.520877 | -1.355483 | 5.159769  |
| 23 | 1 | 0 | 1.095609  | -3.058484 | 4.289211  |
| 24 | 1 | 0 | -1.914797 | -3.773513 | -2.284743 |
| 25 | 1 | 0 | -1.116210 | -2.417908 | 3.022692  |
| 26 | 1 | 0 | 1.123965  | -1.977156 | 2.347370  |
| 27 | 1 | 0 | 2.455700  | 0.006772  | 3.450249  |
| 28 | 1 | 0 | -1.383667 | 1.409572  | 3.390241  |
| 29 | 1 | 0 | 0.822323  | 1.429124  | 0.283023  |
| 30 | 1 | 0 | -0.517945 | 2.174585  | -0.586213 |
| 31 | 1 | 0 | -0.363872 | 0.411427  | -2.255266 |
| 32 | 1 | 0 | -2.078460 | -2.800335 | 1.098027  |
| 33 | 1 | 0 | -2.447932 | -0.379341 | 2.488907  |
| 34 | 1 | 0 | 2.051735  | 2.536326  | 2.211447  |
| 35 | 1 | 0 | 1.268112  | 2.975436  | 3.726306  |
| 36 | 1 | 0 | -0.725581 | 3.680417  | 2.661087  |
| 37 | 1 | 0 | 0.218845  | 3.759401  | 1.168348  |
| 38 | 1 | 0 | 0.361293  | -0.916179 | -4.092567 |
| 39 | 1 | 0 | -1.313573 | -0.325512 | -4.315284 |
| 40 | 1 | 0 | -0.766473 | -1.804272 | -5.156547 |

-----

Cartesian coordinate of SRSR\_c2:

-----

| Center<br>Number | Atomic<br>Number | Atomic<br>Type | Coordinates (Angstroms) |           |           |
|------------------|------------------|----------------|-------------------------|-----------|-----------|
|                  |                  |                | X                       | Y         | Z         |
| 1                | 6                | 0              | -0.808142               | -1.607486 | 3.278661  |
| 2                | 6                | 0              | 0.738755                | -1.647940 | 3.259535  |
| 3                | 6                | 0              | 1.371335                | -0.282745 | 3.238007  |
| 4                | 6                | 0              | 0.655535                | 0.824407  | 3.036367  |
| 5                | 6                | 0              | -0.828190               | 0.822916  | 2.705535  |
| 6                | 7                | 0              | -0.951168               | 1.870305  | 1.667057  |
| 7                | 6                | 0              | -0.398148               | 1.431961  | 0.374270  |
| 8                | 6                | 0              | -0.899285               | 0.076012  | -0.064555 |
| 9                | 6                | 0              | -0.889141               | -0.233237 | -1.436197 |
| 10               | 6                | 0              | -1.296491               | -1.481692 | -1.883421 |
| 11               | 6                | 0              | -1.740592               | -2.445345 | -0.955764 |
| 12               | 6                | 0              | -1.758675               | -2.134439 | 0.394911  |
| 13               | 6                | 0              | -1.323789               | -0.880588 | 0.861711  |
| 14               | 6                | 0              | -1.422154               | -0.544956 | 2.342643  |
| 15               | 6                | 0              | 1.118993                | 2.262357  | 2.902840  |
| 16               | 6                | 0              | -0.114222               | 2.951267  | 2.226494  |
| 17               | 8                | 0              | -1.264829               | -1.304788 | 4.593089  |
| 18               | 8                | 0              | 1.185015                | -2.405496 | 4.408937  |
| 19               | 8                | 0              | -2.161783               | -3.669318 | -1.386307 |
| 20               | 8                | 0              | -1.335229               | -1.908853 | -3.190649 |
| 21               | 6                | 0              | -0.929617               | -1.001356 | -4.202774 |
| 22               | 1                | 0              | -0.774083               | -1.919815 | 5.165778  |
| 23               | 1                | 0              | 1.465769                | -1.755798 | 5.072912  |
| 24               | 1                | 0              | -2.078137               | -3.670557 | -2.355772 |
| 25               | 1                | 0              | -1.168367               | -2.605738 | 2.990629  |

|    |   |   |           |           |           |
|----|---|---|-----------|-----------|-----------|
| 26 | 1 | 0 | 1.067069  | -2.228864 | 2.387918  |
| 27 | 1 | 0 | 2.453547  | -0.248106 | 3.373662  |
| 28 | 1 | 0 | -1.371958 | 1.194726  | 3.585132  |
| 29 | 1 | 0 | 0.709124  | 1.403545  | 0.387297  |
| 30 | 1 | 0 | -0.674297 | 2.187517  | -0.372094 |
| 31 | 1 | 0 | -0.560334 | 0.521744  | -2.143858 |
| 32 | 1 | 0 | -2.132129 | -2.890447 | 1.078565  |
| 33 | 1 | 0 | -2.489839 | -0.522234 | 2.599123  |
| 34 | 1 | 0 | 2.027304  | 2.340754  | 2.295379  |
| 35 | 1 | 0 | 1.347535  | 2.712706  | 3.876791  |
| 36 | 1 | 0 | -0.704509 | 3.491416  | 2.975576  |
| 37 | 1 | 0 | 0.162900  | 3.663438  | 1.444017  |
| 38 | 1 | 0 | 0.118115  | -0.701220 | -4.071653 |
| 39 | 1 | 0 | -1.563989 | -0.105611 | -4.212028 |
| 40 | 1 | 0 | -1.038809 | -1.533510 | -5.149487 |

-----

Cartesian coordinate of SRSR\_c0:

-----

| Center | Atomic | Atomic | Coordinates (Angstroms) |           |           |
|--------|--------|--------|-------------------------|-----------|-----------|
| Number | Number | Type   | X                       | Y         | Z         |
| -----  |        |        |                         |           |           |
| 1      | 6      | 0      | -0.743106               | -1.504965 | 3.256512  |
| 2      | 6      | 0      | 0.798303                | -1.528773 | 3.213509  |
| 3      | 6      | 0      | 1.403464                | -0.148687 | 3.221386  |
| 4      | 6      | 0      | 0.675491                | 0.940535  | 2.977624  |
| 5      | 6      | 0      | -0.800434               | 0.904788  | 2.614469  |
| 6      | 7      | 0      | -0.916866               | 1.918473  | 1.542578  |
| 7      | 6      | 0      | -0.331075               | 1.447964  | 0.276224  |
| 8      | 6      | 0      | -0.816163               | 0.076887  | -0.133641 |
| 9      | 6      | 0      | -0.784451               | -0.270329 | -1.495762 |
| 10     | 6      | 0      | -1.177521               | -1.533642 | -1.913447 |

|    |   |   |           |           |           |
|----|---|---|-----------|-----------|-----------|
| 11 | 6 | 0 | -1.628660 | -2.474312 | -0.965807 |
| 12 | 6 | 0 | -1.668674 | -2.126053 | 0.375343  |
| 13 | 6 | 0 | -1.248887 | -0.856536 | 0.812630  |
| 14 | 6 | 0 | -1.367242 | -0.482514 | 2.281918  |
| 15 | 6 | 0 | 1.115181  | 2.383317  | 2.820129  |
| 16 | 6 | 0 | -0.109517 | 3.029407  | 2.086747  |
| 17 | 8 | 0 | -1.181060 | -1.149441 | 4.560215  |
| 18 | 8 | 0 | 1.190986  | -2.300450 | 4.369969  |
| 19 | 8 | 0 | -2.035262 | -3.712769 | -1.368412 |
| 20 | 8 | 0 | -1.194992 | -1.997149 | -3.208982 |
| 21 | 6 | 0 | -0.786934 | -1.113220 | -4.240613 |
| 22 | 1 | 0 | -0.543097 | -1.580629 | 5.157761  |
| 23 | 1 | 0 | 2.081097  | -2.019054 | 4.630192  |
| 24 | 1 | 0 | -1.940054 | -3.738956 | -2.336447 |
| 25 | 1 | 0 | -1.096392 | -2.517596 | 3.010939  |
| 26 | 1 | 0 | 1.121066  | -2.069908 | 2.310355  |
| 27 | 1 | 0 | 2.482784  | -0.083209 | 3.381028  |
| 28 | 1 | 0 | -1.366283 | 1.293463  | 3.472100  |
| 29 | 1 | 0 | 0.775941  | 1.426510  | 0.315937  |
| 30 | 1 | 0 | -0.593734 | 2.179893  | -0.498022 |
| 31 | 1 | 0 | -0.450814 | 0.466884  | -2.219723 |
| 32 | 1 | 0 | -2.046536 | -2.864594 | 1.075548  |
| 33 | 1 | 0 | -2.437102 | -0.471862 | 2.529895  |
| 34 | 1 | 0 | 2.041007  | 2.465059  | 2.240130  |
| 35 | 1 | 0 | 1.301813  | 2.864181  | 3.788406  |
| 36 | 1 | 0 | -0.727152 | 3.586118  | 2.800743  |
| 37 | 1 | 0 | 0.179076  | 3.718600  | 1.287928  |
| 38 | 1 | 0 | 0.256468  | -0.799459 | -4.106572 |
| 39 | 1 | 0 | -1.429442 | -0.224135 | -4.280641 |
| 40 | 1 | 0 | -0.880699 | -1.671443 | -5.173897 |

---

Cartesian coordinate of SRSR\_c3:

| -----  |        |        |                         |           |           |  |
|--------|--------|--------|-------------------------|-----------|-----------|--|
| Center | Atomic | Atomic | Coordinates (Angstroms) |           |           |  |
| Number | Number | Type   | X                       | Y         | Z         |  |
| -----  |        |        |                         |           |           |  |
| 1      | 6      | 0      | -0.754279               | -1.460448 | 3.359285  |  |
| 2      | 6      | 0      | 0.780518                | -1.511471 | 3.252035  |  |
| 3      | 6      | 0      | 1.373570                | -0.118264 | 3.329034  |  |
| 4      | 6      | 0      | 0.643881                | 0.978635  | 3.107028  |  |
| 5      | 6      | 0      | -0.825781               | 0.956203  | 2.702366  |  |
| 6      | 7      | 0      | -0.893881               | 1.942182  | 1.603043  |  |
| 7      | 6      | 0      | -0.285795               | 1.420143  | 0.367929  |  |
| 8      | 6      | 0      | -0.829822               | 0.066595  | -0.024944 |  |
| 9      | 6      | 0      | -0.808706               | -0.307378 | -1.380062 |  |
| 10     | 6      | 0      | -1.265178               | -1.556275 | -1.776474 |  |
| 11     | 6      | 0      | -1.771411               | -2.454621 | -0.814829 |  |
| 12     | 6      | 0      | -1.799219               | -2.080054 | 0.519424  |  |
| 13     | 6      | 0      | -1.316847               | -0.825648 | 0.934024  |  |
| 14     | 6      | 0      | -1.409997               | -0.434025 | 2.400741  |  |
| 15     | 6      | 0      | 1.088500                | 2.422660  | 2.965619  |  |
| 16     | 6      | 0      | -0.085039               | 3.057351  | 2.141670  |  |
| 17     | 8      | 0      | -1.109664               | -1.192066 | 4.726934  |  |
| 18     | 8      | 0      | 1.305990                | -2.371802 | 4.257255  |  |
| 19     | 8      | 0      | -2.241138               | -3.675938 | -1.197166 |  |
| 20     | 8      | 0      | -1.300022               | -2.042431 | -3.062250 |  |
| 21     | 6      | 0      | -0.825496               | -1.207488 | -4.106883 |  |
| 22     | 1      | 0      | -0.722927               | -0.329580 | 4.956342  |  |
| 23     | 1      | 0      | 0.741172                | -2.218509 | 5.036547  |  |
| 24     | 1      | 0      | -2.136499               | -3.728793 | -2.163202 |  |
| 25     | 1      | 0      | -1.151879               | -2.460707 | 3.172905  |  |
| 26     | 1      | 0      | 1.060956                | -1.966775 | 2.293251  |  |
| 27     | 1      | 0      | 2.442387                | -0.064512 | 3.533413  |  |

|    |   |   |           |           |           |
|----|---|---|-----------|-----------|-----------|
| 28 | 1 | 0 | -1.416965 | 1.395872  | 3.521984  |
| 29 | 1 | 0 | 0.816458  | 1.347827  | 0.448165  |
| 30 | 1 | 0 | -0.489320 | 2.146542  | -0.428467 |
| 31 | 1 | 0 | -0.433350 | 0.397488  | -2.115559 |
| 32 | 1 | 0 | -2.217485 | -2.784876 | 1.231898  |
| 33 | 1 | 0 | -2.474756 | -0.418814 | 2.668669  |
| 34 | 1 | 0 | 2.052335  | 2.498499  | 2.451599  |
| 35 | 1 | 0 | 1.205020  | 2.920010  | 3.936793  |
| 36 | 1 | 0 | -0.725094 | 3.661030  | 2.795466  |
| 37 | 1 | 0 | 0.258893  | 3.702227  | 1.328187  |
| 38 | 1 | 0 | 0.232729  | -0.953790 | -3.963446 |
| 39 | 1 | 0 | -1.413532 | -0.283239 | -4.175813 |
| 40 | 1 | 0 | -0.939847 | -1.780280 | -5.028861 |

#### 5.2.4. SRSS configuration

| Conformer   | Population (%) |
|-------------|----------------|
| SRSS_c0.log | 65.675         |
| SRSS_c1.log | 23.681         |
| SRSS_c3.log | 6.712          |
| SRSS_c2.log | 2.181          |
| SRSS_c4.log | 1.751          |

Cartesian coordinate of SRSS\_c0:

| Center<br>Number | Atomic<br>Number | Atomic<br>Type | Coordinates (Angstroms) |           |          |
|------------------|------------------|----------------|-------------------------|-----------|----------|
|                  |                  |                | X                       | Y         | Z        |
| 1                | 6                | 0              | -0.075783               | -2.783812 | 0.595143 |
| 2                | 6                | 0              | 1.332100                | -2.754002 | 0.619690 |
| 3                | 6                | 0              | 1.997642                | -1.535019 | 0.645374 |
| 4                | 6                | 0              | 1.286738                | -0.323388 | 0.640382 |
| 5                | 6                | 0              | -0.120018               | -0.350796 | 0.615710 |

|    |   |   |           |           |           |
|----|---|---|-----------|-----------|-----------|
| 6  | 6 | 0 | -0.782590 | -1.588926 | 0.598738  |
| 7  | 6 | 0 | 2.092872  | 0.975605  | 0.615975  |
| 8  | 7 | 0 | 1.260019  | 2.135692  | 0.882645  |
| 9  | 6 | 0 | 0.024056  | 2.057615  | 0.115832  |
| 10 | 6 | 0 | -0.883176 | 0.966833  | 0.655827  |
| 11 | 6 | 0 | -0.567160 | 3.429390  | 0.228178  |
| 12 | 6 | 0 | -1.888172 | 3.607474  | 0.183058  |
| 13 | 6 | 0 | -2.873426 | 2.450033  | 0.100013  |
| 14 | 6 | 0 | -2.215951 | 1.057783  | -0.107194 |
| 15 | 8 | 0 | -0.738398 | -3.974823 | 0.573200  |
| 16 | 6 | 0 | 3.329930  | -4.080215 | 0.654989  |
| 17 | 8 | 0 | 1.913358  | -4.000410 | 0.619347  |
| 18 | 6 | 0 | 0.584898  | 4.385330  | 0.498068  |
| 19 | 6 | 0 | 1.823609  | 3.448232  | 0.553107  |
| 20 | 8 | 0 | -3.883412 | 2.665507  | -0.878299 |
| 21 | 8 | 0 | -2.026980 | 0.910304  | -1.519832 |
| 22 | 1 | 0 | -0.061828 | -4.674373 | 0.584527  |
| 23 | 1 | 0 | -3.490097 | 2.374519  | -1.719554 |
| 24 | 1 | 0 | -1.668905 | 0.022548  | -1.677981 |
| 25 | 1 | 0 | 3.083126  | -1.508361 | 0.666560  |
| 26 | 1 | 0 | -1.867353 | -1.644742 | 0.603967  |
| 27 | 1 | 0 | 2.587626  | 1.061820  | -0.376989 |
| 28 | 1 | 0 | 2.899914  | 0.925437  | 1.359392  |
| 29 | 1 | 0 | 0.235563  | 1.839097  | -0.952448 |
| 30 | 1 | 0 | -1.095356 | 1.213822  | 1.707168  |
| 31 | 1 | 0 | -2.342347 | 4.593197  | 0.274399  |
| 32 | 1 | 0 | -3.412934 | 2.412728  | 1.057157  |
| 33 | 1 | 0 | -2.932181 | 0.300882  | 0.243467  |
| 34 | 1 | 0 | 3.777853  | -3.600579 | -0.224827 |
| 35 | 1 | 0 | 3.573790  | -5.144007 | 0.651912  |
| 36 | 1 | 0 | 3.731769  | -3.616027 | 1.564749  |
| 37 | 1 | 0 | 0.438822  | 4.903172  | 1.452979  |



|    |   |   |          |          |           |
|----|---|---|----------|----------|-----------|
| 38 | 1 | 0 | 0.697202 | 5.154720 | -0.274246 |
| 39 | 1 | 0 | 2.328843 | 3.433064 | -0.433339 |
| 40 | 1 | 0 | 2.564350 | 3.756366 | 1.299296  |

-----

Cartesian coordinate of SRSS\_c1:

-----

| Center | Atomic | Atomic | Coordinates (Angstroms) |           |           |
|--------|--------|--------|-------------------------|-----------|-----------|
| Number | Number | Type   | X                       | Y         | Z         |
| 1      | 6      | 0      | 0.111707                | -2.761288 | 0.664038  |
| 2      | 6      | 0      | 1.519559                | -2.736227 | 0.635299  |
| 3      | 6      | 0      | 2.188932                | -1.519948 | 0.624899  |
| 4      | 6      | 0      | 1.478825                | -0.307622 | 0.641139  |
| 5      | 6      | 0      | 0.073181                | -0.331702 | 0.669446  |
| 6      | 6      | 0      | -0.591597               | -1.566188 | 0.684658  |
| 7      | 6      | 0      | 2.284533                | 0.988783  | 0.577671  |
| 8      | 7      | 0      | 1.469049                | 2.144144  | 0.910834  |
| 9      | 6      | 0      | 0.195878                | 2.093068  | 0.202632  |
| 10     | 6      | 0      | -0.684952               | 0.985974  | 0.755048  |
| 11     | 6      | 0      | -0.381513               | 3.459391  | 0.419385  |
| 12     | 6      | 0      | -1.702521               | 3.645239  | 0.479108  |
| 13     | 6      | 0      | -2.688382               | 2.505713  | 0.333330  |
| 14     | 6      | 0      | -2.054981               | 1.094929  | 0.076164  |
| 15     | 8      | 0      | -0.553593               | -3.952768 | 0.675376  |
| 16     | 6      | 0      | 3.513074                | -4.066464 | 0.574308  |
| 17     | 8      | 0      | 2.098275                | -3.985714 | 0.622379  |
| 18     | 6      | 0      | 0.783130                | 4.401699  | 0.676301  |
| 19     | 6      | 0      | 2.020085                | 3.464985  | 0.606219  |
| 20     | 8      | 0      | -3.648666               | 2.780392  | -0.709180 |
| 21     | 8      | 0      | -1.897847               | 0.874866  | -1.318000 |
| 22     | 1      | 0      | 0.122932                | -4.651712 | 0.651340  |

|    |   |   |           |           |           |
|----|---|---|-----------|-----------|-----------|
| 23 | 1 | 0 | -3.161075 | 3.254894  | -1.402174 |
| 24 | 1 | 0 | -2.762184 | 1.106773  | -1.700655 |
| 25 | 1 | 0 | 3.274458  | -1.494880 | 0.602789  |
| 26 | 1 | 0 | -1.675410 | -1.616784 | 0.702683  |
| 27 | 1 | 0 | 2.716791  | 1.089578  | -0.442378 |
| 28 | 1 | 0 | 3.135112  | 0.933745  | 1.270385  |
| 29 | 1 | 0 | 0.345564  | 1.919242  | -0.882977 |
| 30 | 1 | 0 | -0.845770 | 1.217750  | 1.819344  |
| 31 | 1 | 0 | -2.136645 | 4.624956  | 0.678957  |
| 32 | 1 | 0 | -3.292260 | 2.445843  | 1.248233  |
| 33 | 1 | 0 | -2.750301 | 0.348451  | 0.492445  |
| 34 | 1 | 0 | 3.908968  | -3.591650 | -0.332909 |
| 35 | 1 | 0 | 3.756837  | -5.130451 | 0.562985  |
| 36 | 1 | 0 | 3.969606  | -3.597579 | 1.455785  |
| 37 | 1 | 0 | 0.690630  | 4.862389  | 1.666503  |
| 38 | 1 | 0 | 0.846617  | 5.214815  | -0.055757 |
| 39 | 1 | 0 | 2.461869  | 3.498113  | -0.409993 |
| 40 | 1 | 0 | 2.806702  | 3.737464  | 1.318460  |

-----

Cartesian coordinate of SRSS\_c3:

-----

| Center | Atomic | Atomic | Coordinates (Angstroms) |           |          |
|--------|--------|--------|-------------------------|-----------|----------|
| Number | Number | Type   | X                       | Y         | Z        |
| -----  |        |        |                         |           |          |
| 1      | 6      | 0      | 0.329186                | -2.775815 | 0.653188 |
| 2      | 6      | 0      | 1.737060                | -2.747965 | 0.665428 |
| 3      | 6      | 0      | 2.404403                | -1.530415 | 0.672254 |
| 4      | 6      | 0      | 1.692571                | -0.319075 | 0.665024 |
| 5      | 6      | 0      | 0.286511                | -0.346226 | 0.652241 |
| 6      | 6      | 0      | -0.376329               | -1.581747 | 0.651069 |
| 7      | 6      | 0      | 2.498553                | 0.978516  | 0.620003 |

|    |   |   |           |           |           |
|----|---|---|-----------|-----------|-----------|
| 8  | 7 | 0 | 1.674747  | 2.137331  | 0.921772  |
| 9  | 6 | 0 | 0.420966  | 2.074346  | 0.180355  |
| 10 | 6 | 0 | -0.473381 | 0.970966  | 0.715649  |
| 11 | 6 | 0 | -0.163731 | 3.443249  | 0.350989  |
| 12 | 6 | 0 | -1.484159 | 3.633514  | 0.367449  |
| 13 | 6 | 0 | -2.461120 | 2.482598  | 0.296035  |
| 14 | 6 | 0 | -1.822973 | 1.091604  | -0.007816 |
| 15 | 8 | 0 | -0.334084 | -3.968688 | 0.648102  |
| 16 | 6 | 0 | 3.733898  | -4.074545 | 0.660596  |
| 17 | 8 | 0 | 2.318187  | -3.996575 | 0.672282  |
| 18 | 6 | 0 | 0.996047  | 4.392343  | 0.605049  |
| 19 | 6 | 0 | 2.233611  | 3.452470  | 0.601156  |
| 20 | 8 | 0 | -3.433806 | 2.782883  | -0.729186 |
| 21 | 8 | 0 | -1.636604 | 0.941225  | -1.403857 |
| 22 | 1 | 0 | 0.344489  | -4.666070 | 0.643478  |
| 23 | 1 | 0 | -4.225411 | 2.250328  | -0.546159 |
| 24 | 1 | 0 | -2.307502 | 1.523414  | -1.808791 |
| 25 | 1 | 0 | 3.490077  | -1.503697 | 0.681568  |
| 26 | 1 | 0 | -1.460272 | -1.634162 | 0.638676  |
| 27 | 1 | 0 | 2.960025  | 1.072926  | -0.387779 |
| 28 | 1 | 0 | 3.329055  | 0.926346  | 1.336988  |
| 29 | 1 | 0 | 0.600596  | 1.884971  | -0.897591 |
| 30 | 1 | 0 | -0.662616 | 1.201562  | 1.776041  |
| 31 | 1 | 0 | -1.926123 | 4.618561  | 0.508435  |
| 32 | 1 | 0 | -2.983582 | 2.418970  | 1.264412  |
| 33 | 1 | 0 | -2.526031 | 0.322048  | 0.359176  |
| 34 | 1 | 0 | 4.151918  | -3.600287 | -0.236887 |
| 35 | 1 | 0 | 3.979932  | -5.138066 | 0.657296  |
| 36 | 1 | 0 | 4.166807  | -3.603385 | 1.552737  |
| 37 | 1 | 0 | 0.879023  | 4.889765  | 1.574678  |
| 38 | 1 | 0 | 1.081707  | 5.177519  | -0.154650 |
| 39 | 1 | 0 | 2.707466  | 3.458082  | -0.400836 |

40      1      0      2.997548   3.744352   1.330325

-----

Cartesian coordinate of SRSS\_c2:

-----

| Center | Atomic | Atomic | Coordinates (Angstroms) |   |   |
|--------|--------|--------|-------------------------|---|---|
| Number | Number | Type   | X                       | Y | Z |

-----

|    |   |   |           |           |           |
|----|---|---|-----------|-----------|-----------|
| 1  | 6 | 0 | 0.009711  | -2.810089 | 0.520539  |
| 2  | 6 | 0 | 1.417084  | -2.788724 | 0.529285  |
| 3  | 6 | 0 | 2.095597  | -1.573275 | 0.551474  |
| 4  | 6 | 0 | 1.383221  | -0.367441 | 0.566031  |
| 5  | 6 | 0 | -0.021456 | -0.386315 | 0.552684  |
| 6  | 6 | 0 | -0.698518 | -1.611717 | 0.529148  |
| 7  | 6 | 0 | 2.094681  | 0.968618  | 0.662849  |
| 8  | 7 | 0 | 1.521925  | 1.977348  | -0.228027 |
| 9  | 6 | 0 | 0.069657  | 1.859512  | -0.473451 |
| 10 | 6 | 0 | -0.692687 | 0.972467  | 0.530315  |
| 11 | 6 | 0 | -0.453743 | 3.272440  | -0.435288 |
| 12 | 6 | 0 | -1.719519 | 3.543761  | -0.111120 |
| 13 | 6 | 0 | -2.725525 | 2.477941  | 0.286332  |
| 14 | 6 | 0 | -2.183721 | 1.031395  | 0.159957  |
| 15 | 8 | 0 | -0.659179 | -3.997084 | 0.497553  |
| 16 | 6 | 0 | 3.405777  | -4.129464 | 0.511223  |
| 17 | 8 | 0 | 1.989275  | -4.039732 | 0.509702  |
| 18 | 6 | 0 | 0.735013  | 4.185007  | -0.601981 |
| 19 | 6 | 0 | 1.828898  | 3.369097  | 0.119601  |
| 20 | 8 | 0 | -3.964830 | 2.606667  | -0.398899 |
| 21 | 8 | 0 | -2.411350 | 0.642788  | -1.199925 |
| 22 | 1 | 0 | 0.014017  | -4.700149 | 0.493576  |
| 23 | 1 | 0 | -3.830030 | 2.166991  | -1.256482 |
| 24 | 1 | 0 | -2.073098 | -0.258621 | -1.318802 |

|    |   |   |           |           |           |
|----|---|---|-----------|-----------|-----------|
| 25 | 1 | 0 | 3.180742  | -1.550222 | 0.555833  |
| 26 | 1 | 0 | -1.783673 | -1.667751 | 0.540038  |
| 27 | 1 | 0 | 3.162099  | 0.843171  | 0.434891  |
| 28 | 1 | 0 | 2.048685  | 1.312885  | 1.718675  |
| 29 | 1 | 0 | -0.088829 | 1.420491  | -1.468028 |
| 30 | 1 | 0 | -0.593401 | 1.430035  | 1.528177  |
| 31 | 1 | 0 | -2.077549 | 4.569996  | -0.040969 |
| 32 | 1 | 0 | -2.972373 | 2.642192  | 1.345003  |
| 33 | 1 | 0 | -2.778913 | 0.390265  | 0.827047  |
| 34 | 1 | 0 | 3.836234  | -3.645040 | -0.374568 |
| 35 | 1 | 0 | 3.641883  | -5.194855 | 0.493130  |
| 36 | 1 | 0 | 3.832293  | -3.676545 | 1.415472  |
| 37 | 1 | 0 | 0.589870  | 5.181436  | -0.174471 |
| 38 | 1 | 0 | 0.999128  | 4.300595  | -1.662146 |
| 39 | 1 | 0 | 2.843949  | 3.635316  | -0.201176 |
| 40 | 1 | 0 | 1.769736  | 3.548150  | 1.211690  |

-----

Cartesian coordinate of SRSS\_c4:

-----

| Center | Atomic | Atomic | Coordinates (Angstroms) |           |           |
|--------|--------|--------|-------------------------|-----------|-----------|
| Number | Number | Type   | X                       | Y         | Z         |
| -----  |        |        |                         |           |           |
| 1      | 6      | 0      | 0.013699                | -2.815248 | 0.545035  |
| 2      | 6      | 0      | 1.421420                | -2.791193 | 0.558107  |
| 3      | 6      | 0      | 2.098502                | -1.575549 | 0.566032  |
| 4      | 6      | 0      | 1.379495                | -0.373414 | 0.578984  |
| 5      | 6      | 0      | -0.024111               | -0.397898 | 0.574542  |
| 6      | 6      | 0      | -0.699456               | -1.621491 | 0.544535  |
| 7      | 6      | 0      | 2.083987                | 0.965761  | 0.646802  |
| 8      | 7      | 0      | 1.492260                | 1.961887  | -0.250706 |
| 9      | 6      | 0      | 0.028531                | 1.852164  | -0.450546 |

|    |   |   |           |           |           |
|----|---|---|-----------|-----------|-----------|
| 10 | 6 | 0 | -0.693652 | 0.961112  | 0.578122  |
| 11 | 6 | 0 | -0.479243 | 3.269187  | -0.371248 |
| 12 | 6 | 0 | -1.720939 | 3.556966  | 0.029563  |
| 13 | 6 | 0 | -2.726574 | 2.496120  | 0.405482  |
| 14 | 6 | 0 | -2.198837 | 1.027407  | 0.305179  |
| 15 | 8 | 0 | -0.649629 | -4.007526 | 0.519123  |
| 16 | 6 | 0 | 3.413051  | -4.125714 | 0.513126  |
| 17 | 8 | 0 | 1.998046  | -4.042529 | 0.545864  |
| 18 | 6 | 0 | 0.702378  | 4.178040  | -0.585066 |
| 19 | 6 | 0 | 1.823399  | 3.352175  | 0.078665  |
| 20 | 8 | 0 | -3.935221 | 2.613066  | -0.376942 |
| 21 | 8 | 0 | -2.457872 | 0.504467  | -0.989637 |
| 22 | 1 | 0 | 0.028676  | -4.705066 | 0.502808  |
| 23 | 1 | 0 | -3.660353 | 2.940303  | -1.248950 |
| 24 | 1 | 0 | -3.382218 | 0.752876  | -1.169777 |
| 25 | 1 | 0 | 3.183602  | -1.548607 | 0.560773  |
| 26 | 1 | 0 | -1.781176 | -1.668501 | 0.490523  |
| 27 | 1 | 0 | 3.147537  | 0.845122  | 0.400056  |
| 28 | 1 | 0 | 2.055766  | 1.330423  | 1.696545  |
| 29 | 1 | 0 | -0.171985 | 1.423272  | -1.441427 |
| 30 | 1 | 0 | -0.540768 | 1.419133  | 1.569679  |
| 31 | 1 | 0 | -2.046936 | 4.589961  | 0.151322  |
| 32 | 1 | 0 | -3.052810 | 2.673189  | 1.438709  |
| 33 | 1 | 0 | -2.738061 | 0.430854  | 1.059639  |
| 34 | 1 | 0 | 3.820410  | -3.645104 | -0.385913 |
| 35 | 1 | 0 | 3.654830  | -5.190121 | 0.496839  |
| 36 | 1 | 0 | 3.860731  | -3.664527 | 1.403237  |
| 37 | 1 | 0 | 0.580829  | 5.173174  | -0.147164 |
| 38 | 1 | 0 | 0.912798  | 4.296167  | -1.656817 |
| 39 | 1 | 0 | 2.822525  | 3.614319  | -0.291542 |
| 40 | 1 | 0 | 1.819503  | 3.532525  | 1.172086  |

-----

### 5.2.5. SSRR configuration

| Conformer   | Population (%) |
|-------------|----------------|
| SSRR_c0.log | 31.954         |
| SSRR_c1.log | 25.711         |
| SSRR_c2.log | 18.685         |
| SSRR_c3.log | 16.006         |
| SSRR_c4.log | 3.184          |
| SSRR_c7.log | 2.611          |
| SSRR_c5.log | 1.850          |

Cartesian coordinate of SSRR\_c0:

| -----  |        |        |                         |           |           |  |
|--------|--------|--------|-------------------------|-----------|-----------|--|
| Center | Atomic | Atomic | Coordinates (Angstroms) |           |           |  |
| Number | Number | Type   | X                       | Y         | Z         |  |
| -----  |        |        |                         |           |           |  |
| 1      | 6      | 0      | 2.264046                | -1.898165 | -0.650494 |  |
| 2      | 6      | 0      | 3.807883                | -1.955586 | -0.535599 |  |
| 3      | 6      | 0      | 4.502032                | -0.616055 | -0.562387 |  |
| 4      | 6      | 0      | 3.819184                | 0.523105  | -0.453275 |  |
| 5      | 6      | 0      | 2.317048                | 0.532555  | -0.406375 |  |
| 6      | 7      | 0      | 2.005588                | 1.697847  | 0.408330  |  |
| 7      | 6      | 0      | 0.596163                | 2.035812  | 0.312128  |  |
| 8      | 6      | 0      | -0.299022               | 0.802159  | 0.393220  |  |
| 9      | 6      | 0      | -1.678860               | 1.020135  | 0.541955  |  |
| 10     | 6      | 0      | -2.570564               | -0.043541 | 0.561633  |  |
| 11     | 6      | 0      | -2.089528               | -1.359575 | 0.426993  |  |
| 12     | 6      | 0      | -0.727187               | -1.581729 | 0.287132  |  |
| 13     | 6      | 0      | 0.185753                | -0.513892 | 0.267599  |  |
| 14     | 6      | 0      | 1.694676                | -0.730843 | 0.178838  |  |
| 15     | 6      | 0      | 4.280747                | 1.955040  | -0.240026 |  |
| 16     | 6      | 0      | 2.954510                | 2.730198  | -0.017702 |  |
| 17     | 8      | 0      | 1.760086                | -3.203580 | -0.331479 |  |
| 18     | 8      | 0      | 4.344155                | -2.794013 | -1.553484 |  |

|    |   |   |           |           |           |
|----|---|---|-----------|-----------|-----------|
| 19 | 8 | 0 | -2.958396 | -2.411916 | 0.439127  |
| 20 | 8 | 0 | -3.936924 | 0.040687  | 0.702859  |
| 21 | 6 | 0 | -4.518497 | 1.327847  | 0.831643  |
| 22 | 1 | 0 | 1.919442  | -3.351611 | 0.616345  |
| 23 | 1 | 0 | 3.819073  | -3.612203 | -1.515071 |
| 24 | 1 | 0 | -3.851092 | -2.038302 | 0.540317  |
| 25 | 1 | 0 | 2.006761  | -1.760220 | -1.706210 |
| 26 | 1 | 0 | 4.025299  | -2.411511 | 0.453668  |
| 27 | 1 | 0 | 5.590139  | -0.642803 | -0.585293 |
| 28 | 1 | 0 | 1.923671  | 0.662840  | -1.441397 |
| 29 | 1 | 0 | 0.382332  | 2.560825  | -0.645126 |
| 30 | 1 | 0 | 0.336948  | 2.740711  | 1.113738  |
| 31 | 1 | 0 | -2.042929 | 2.038878  | 0.637537  |
| 32 | 1 | 0 | -0.380193 | -2.600828 | 0.169891  |
| 33 | 1 | 0 | 2.088718  | -0.826795 | 1.204415  |
| 34 | 1 | 0 | 4.843169  | 2.355169  | -1.091248 |
| 35 | 1 | 0 | 4.932058  | 2.021138  | 0.638804  |
| 36 | 1 | 0 | 3.037834  | 3.519845  | 0.737172  |
| 37 | 1 | 0 | 2.631109  | 3.206926  | -0.964472 |
| 38 | 1 | 0 | -4.318606 | 1.946005  | -0.053277 |
| 39 | 1 | 0 | -4.146926 | 1.845516  | 1.725534  |
| 40 | 1 | 0 | -5.593972 | 1.167220  | 0.926599  |

-----

Cartesian coordinate of SSRR\_c1:

-----

| Center | Atomic | Atomic | Coordinates (Angstroms) |           |           |
|--------|--------|--------|-------------------------|-----------|-----------|
| Number | Number | Type   | X                       | Y         | Z         |
| -----  |        |        |                         |           |           |
| 1      | 6      | 0      | 2.271739                | -1.702581 | -0.663269 |
| 2      | 6      | 0      | 3.810488                | -1.758433 | -0.547431 |
| 3      | 6      | 0      | 4.507313                | -0.416072 | -0.561504 |



|    |   |   |           |           |           |
|----|---|---|-----------|-----------|-----------|
| 4  | 6 | 0 | 3.821816  | 0.721778  | -0.449359 |
| 5  | 6 | 0 | 2.319934  | 0.718428  | -0.404269 |
| 6  | 7 | 0 | 1.995785  | 1.888846  | 0.397325  |
| 7  | 6 | 0 | 0.583990  | 2.211496  | 0.282295  |
| 8  | 6 | 0 | -0.297269 | 0.969907  | 0.387363  |
| 9  | 6 | 0 | -1.677925 | 1.176284  | 0.544903  |
| 10 | 6 | 0 | -2.555937 | 0.102689  | 0.600449  |
| 11 | 6 | 0 | -2.059609 | -1.210818 | 0.502308  |
| 12 | 6 | 0 | -0.696326 | -1.421807 | 0.355963  |
| 13 | 6 | 0 | 0.201456  | -0.343241 | 0.287451  |
| 14 | 6 | 0 | 1.711416  | -0.549301 | 0.185266  |
| 15 | 6 | 0 | 4.273229  | 2.155724  | -0.229766 |
| 16 | 6 | 0 | 2.938767  | 2.923152  | -0.034088 |
| 17 | 8 | 0 | 1.753426  | -2.964963 | -0.258775 |
| 18 | 8 | 0 | 4.222362  | -2.635807 | -1.614001 |
| 19 | 8 | 0 | -2.916725 | -2.272418 | 0.558320  |
| 20 | 8 | 0 | -3.922966 | 0.175241  | 0.751981  |
| 21 | 6 | 0 | -4.515686 | 1.457943  | 0.865604  |
| 22 | 1 | 0 | 2.221494  | -3.619060 | -0.805031 |
| 23 | 1 | 0 | 5.139637  | -2.900968 | -1.446499 |
| 24 | 1 | 0 | -3.810923 | -1.905045 | 0.667511  |
| 25 | 1 | 0 | 2.026034  | -1.519597 | -1.722088 |
| 26 | 1 | 0 | 4.028785  | -2.251796 | 0.415046  |
| 27 | 1 | 0 | 5.598239  | -0.427987 | -0.567138 |
| 28 | 1 | 0 | 1.930235  | 0.838607  | -1.442159 |
| 29 | 1 | 0 | 0.374759  | 2.713498  | -0.688501 |
| 30 | 1 | 0 | 0.311641  | 2.931200  | 1.066064  |
| 31 | 1 | 0 | -2.052851 | 2.192785  | 0.620756  |
| 32 | 1 | 0 | -0.329967 | -2.438147 | 0.286735  |
| 33 | 1 | 0 | 2.111887  | -0.661407 | 1.203890  |
| 34 | 1 | 0 | 4.851948  | 2.557356  | -1.069344 |
| 35 | 1 | 0 | 4.905028  | 2.225051  | 0.663178  |

|    |   |   |           |          |           |
|----|---|---|-----------|----------|-----------|
| 36 | 1 | 0 | 3.007659  | 3.725409 | 0.708839  |
| 37 | 1 | 0 | 2.623017  | 3.381976 | -0.992575 |
| 38 | 1 | 0 | -4.333727 | 2.062894 | -0.032412 |
| 39 | 1 | 0 | -4.138087 | 1.995688 | 1.745167  |
| 40 | 1 | 0 | -5.588391 | 1.288797 | 0.977182  |

-----

Cartesian coordinate of SSRR\_c2:

| Center<br>Number | Atomic<br>Number | Atomic<br>Type | Coordinates (Angstroms) |           |           |
|------------------|------------------|----------------|-------------------------|-----------|-----------|
|                  |                  |                | X                       | Y         | Z         |
| 1                | 6                | 0              | 2.249146                | -1.876977 | -0.800775 |
| 2                | 6                | 0              | 3.787337                | -1.954298 | -0.699682 |
| 3                | 6                | 0              | 4.474222                | -0.607552 | -0.690345 |
| 4                | 6                | 0              | 3.787200                | 0.526529  | -0.548661 |
| 5                | 6                | 0              | 2.286774                | 0.512765  | -0.474486 |
| 6                | 7                | 0              | 1.951573                | 1.690045  | 0.308909  |
| 7                | 6                | 0              | 0.534328                | 1.977959  | 0.171369  |
| 8                | 6                | 0              | -0.312776               | 0.724196  | 0.380264  |
| 9                | 6                | 0              | -1.686936               | 0.900943  | 0.614527  |
| 10               | 6                | 0              | -2.522427               | -0.188092 | 0.822552  |
| 11               | 6                | 0              | -1.983858               | -1.488878 | 0.829265  |
| 12               | 6                | 0              | -0.626390               | -1.667961 | 0.605861  |
| 13               | 6                | 0              | 0.223139                | -0.577575 | 0.347029  |
| 14               | 6                | 0              | 1.720207                | -0.763381 | 0.132453  |
| 15               | 6                | 0              | 4.226778                | 1.964242  | -0.324968 |
| 16               | 6                | 0              | 2.884556                | 2.724338  | -0.149170 |
| 17               | 8                | 0              | 1.801312                | -3.209916 | -0.521898 |
| 18               | 8                | 0              | 4.311492                | -2.744017 | -1.764773 |
| 19               | 8                | 0              | -2.788423               | -2.564642 | 1.066953  |
| 20               | 8                | 0              | -3.876953               | -0.144374 | 1.059111  |

|    |   |   |           |           |           |
|----|---|---|-----------|-----------|-----------|
| 21 | 6 | 0 | -4.505864 | 1.126100  | 1.118526  |
| 22 | 1 | 0 | 0.925081  | -3.316038 | -0.920975 |
| 23 | 1 | 0 | 3.839941  | -3.592137 | -1.703172 |
| 24 | 1 | 0 | -3.685259 | -2.217770 | 1.216594  |
| 25 | 1 | 0 | 1.998189  | -1.623359 | -1.841325 |
| 26 | 1 | 0 | 4.006868  | -2.456574 | 0.261049  |
| 27 | 1 | 0 | 5.561596  | -0.628933 | -0.734520 |
| 28 | 1 | 0 | 1.874490  | 0.616482  | -1.506241 |
| 29 | 1 | 0 | 0.313807  | 2.402640  | -0.833511 |
| 30 | 1 | 0 | 0.243851  | 2.743677  | 0.902532  |
| 31 | 1 | 0 | -2.090518 | 1.908893  | 0.638152  |
| 32 | 1 | 0 | -0.227922 | -2.673127 | 0.676806  |
| 33 | 1 | 0 | 2.191561  | -0.904466 | 1.116194  |
| 34 | 1 | 0 | 4.816945  | 2.369954  | -1.154258 |
| 35 | 1 | 0 | 4.841450  | 2.039721  | 0.579502  |
| 36 | 1 | 0 | 2.944731  | 3.546083  | 0.572684  |
| 37 | 1 | 0 | 2.564462  | 3.153155  | -1.119875 |
| 38 | 1 | 0 | -4.406634 | 1.664290  | 0.166991  |
| 39 | 1 | 0 | -4.087970 | 1.739988  | 1.926833  |
| 40 | 1 | 0 | -5.561543 | 0.933218  | 1.317578  |

-----

Cartesian coordinate of SSRR\_c3:

-----

| Center | Atomic | Atomic | Coordinates (Angstroms) |           |           |
|--------|--------|--------|-------------------------|-----------|-----------|
| Number | Number | Type   | X                       | Y         | Z         |
| -----  |        |        |                         |           |           |
| 1      | 6      | 0      | 2.207633                | -1.709876 | -0.441423 |
| 2      | 6      | 0      | 3.747328                | -1.770088 | -0.336347 |
| 3      | 6      | 0      | 4.429680                | -0.426255 | -0.392201 |
| 4      | 6      | 0      | 3.739200                | 0.716215  | -0.353395 |
| 5      | 6      | 0      | 2.228815                | 0.738944  | -0.305496 |

|    |   |   |           |           |           |
|----|---|---|-----------|-----------|-----------|
| 6  | 7 | 0 | 1.892739  | 2.008912  | 0.367658  |
| 7  | 6 | 0 | 0.798693  | 1.929233  | 1.337349  |
| 8  | 6 | 0 | -0.259100 | 0.929375  | 0.917868  |
| 9  | 6 | 0 | -1.622930 | 1.232764  | 1.010931  |
| 10 | 6 | 0 | -2.573998 | 0.281490  | 0.654045  |
| 11 | 6 | 0 | -2.165811 | -0.984137 | 0.193501  |
| 12 | 6 | 0 | -0.811276 | -1.286037 | 0.096444  |
| 13 | 6 | 0 | 0.149058  | -0.335788 | 0.460426  |
| 14 | 6 | 0 | 1.651923  | -0.530082 | 0.363607  |
| 15 | 6 | 0 | 4.209268  | 2.128187  | -0.118739 |
| 16 | 6 | 0 | 3.126884  | 2.626945  | 0.861300  |
| 17 | 8 | 0 | 1.675412  | -2.949916 | 0.006273  |
| 18 | 8 | 0 | 4.256055  | -2.717550 | -1.291097 |
| 19 | 8 | 0 | -3.098519 | -1.915133 | -0.161831 |
| 20 | 8 | 0 | -3.941477 | 0.444967  | 0.695175  |
| 21 | 6 | 0 | -4.452777 | 1.687145  | 1.148568  |
| 22 | 1 | 0 | 2.194519  | -3.633297 | -0.452779 |
| 23 | 1 | 0 | 4.197814  | -2.296954 | -2.165267 |
| 24 | 1 | 0 | -3.970297 | -1.508042 | -0.016551 |
| 25 | 1 | 0 | 1.945110  | -1.552429 | -1.504563 |
| 26 | 1 | 0 | 3.977403  | -2.238771 | 0.630266  |
| 27 | 1 | 0 | 5.518677  | -0.434597 | -0.362261 |
| 28 | 1 | 0 | 1.817779  | 0.766223  | -1.329064 |
| 29 | 1 | 0 | 0.351911  | 2.924912  | 1.459922  |
| 30 | 1 | 0 | 1.189725  | 1.643727  | 2.337426  |
| 31 | 1 | 0 | -1.928392 | 2.214890  | 1.357759  |
| 32 | 1 | 0 | -0.515298 | -2.270831 | -0.243853 |
| 33 | 1 | 0 | 2.066141  | -0.599138 | 1.382496  |
| 34 | 1 | 0 | 4.168330  | 2.716774  | -1.045435 |
| 35 | 1 | 0 | 5.223289  | 2.193303  | 0.286202  |
| 36 | 1 | 0 | 3.375736  | 2.300096  | 1.890284  |
| 37 | 1 | 0 | 3.034832  | 3.720112  | 0.877371  |

|    |   |   |           |          |          |
|----|---|---|-----------|----------|----------|
| 38 | 1 | 0 | -4.127190 | 2.512867 | 0.502424 |
| 39 | 1 | 0 | -4.142747 | 1.893376 | 2.181385 |
| 40 | 1 | 0 | -5.540297 | 1.601873 | 1.106894 |

-----

Cartesian coordinate of SSRR\_c4:

-----

| Center<br>Number | Atomic<br>Number | Atomic<br>Type | Coordinates (Angstroms) |           |           |
|------------------|------------------|----------------|-------------------------|-----------|-----------|
|                  |                  |                | X                       | Y         | Z         |
| 1                | 6                | 0              | 2.192224                | -1.906822 | -0.902527 |
| 2                | 6                | 0              | 3.733594                | -1.964169 | -0.826913 |
| 3                | 6                | 0              | 4.403455                | -0.614871 | -0.883378 |
| 4                | 6                | 0              | 3.710777                | 0.522373  | -0.806816 |
| 5                | 6                | 0              | 2.202259                | 0.542173  | -0.722181 |
| 6                | 7                | 0              | 1.879191                | 1.795322  | -0.011506 |
| 7                | 6                | 0              | 0.818229                | 1.690882  | 0.990569  |
| 8                | 6                | 0              | -0.250013               | 0.695027  | 0.587131  |
| 9                | 6                | 0              | -1.610963               | 0.989271  | 0.735090  |
| 10               | 6                | 0              | -2.570939               | 0.042143  | 0.390960  |
| 11               | 6                | 0              | -2.174912               | -1.209885 | -0.115369 |
| 12               | 6                | 0              | -0.823329               | -1.502401 | -0.269185 |
| 13               | 6                | 0              | 0.146322                | -0.556999 | 0.085007  |
| 14               | 6                | 0              | 1.645998                | -0.741536 | -0.064147 |
| 15               | 6                | 0              | 4.180896                | 1.933364  | -0.564387 |
| 16               | 6                | 0              | 3.125214                | 2.413369  | 0.453397  |
| 17               | 8                | 0              | 1.679359                | -3.205701 | -0.575101 |
| 18               | 8                | 0              | 4.250338                | -2.806999 | -1.850815 |
| 19               | 8                | 0              | -3.115234               | -2.136655 | -0.459008 |
| 20               | 8                | 0              | -3.935893               | 0.197605  | 0.485567  |
| 21               | 6                | 0              | -4.437096               | 1.436032  | 0.961740  |
| 22               | 1                | 0              | 1.777317                | -3.328067 | 0.384001  |

|    |   |   |           |           |           |
|----|---|---|-----------|-----------|-----------|
| 23 | 1 | 0 | 3.736803  | -3.630990 | -1.788983 |
| 24 | 1 | 0 | -3.983746 | -1.733815 | -0.284616 |
| 25 | 1 | 0 | 1.911127  | -1.761961 | -1.951770 |
| 26 | 1 | 0 | 3.980886  | -2.407798 | 0.160489  |
| 27 | 1 | 0 | 5.492012  | -0.619554 | -0.898225 |
| 28 | 1 | 0 | 1.763767  | 0.588678  | -1.733001 |
| 29 | 1 | 0 | 0.371092  | 2.681350  | 1.148992  |
| 30 | 1 | 0 | 1.241974  | 1.387295  | 1.972481  |
| 31 | 1 | 0 | -1.907724 | 1.961967  | 1.114420  |
| 32 | 1 | 0 | -0.539861 | -2.472848 | -0.658896 |
| 33 | 1 | 0 | 2.093394  | -0.814244 | 0.943475  |
| 34 | 1 | 0 | 4.112519  | 2.535682  | -1.480469 |
| 35 | 1 | 0 | 5.205311  | 1.997675  | -0.186425 |
| 36 | 1 | 0 | 3.404902  | 2.073473  | 1.470333  |
| 37 | 1 | 0 | 3.027356  | 3.505660  | 0.488032  |
| 38 | 1 | 0 | -4.132167 | 2.266225  | 0.311512  |
| 39 | 1 | 0 | -4.097892 | 1.636140  | 1.986485  |
| 40 | 1 | 0 | -5.525023 | 1.347680  | 0.951146  |

-----

Cartesian coordinate of SSRR\_c7:

-----

| Center | Atomic | Atomic | Coordinates (Angstroms) |           |           |
|--------|--------|--------|-------------------------|-----------|-----------|
| Number | Number | Type   | X                       | Y         | Z         |
| -----  |        |        |                         |           |           |
| 1      | 6      | 0      | 2.242914                | -2.100158 | -0.143537 |
| 2      | 6      | 0      | 3.801327                | -2.152194 | -0.083904 |
| 3      | 6      | 0      | 4.495857                | -0.807294 | -0.039498 |
| 4      | 6      | 0      | 3.824162                | 0.342847  | 0.016066  |
| 5      | 6      | 0      | 2.323011                | 0.359375  | 0.015146  |
| 6      | 7      | 0      | 1.996224                | 1.555329  | 0.777863  |
| 7      | 6      | 0      | 0.592486                | 1.894990  | 0.633466  |

|    |   |   |           |           |           |
|----|---|---|-----------|-----------|-----------|
| 8  | 6 | 0 | -0.305878 | 0.667859  | 0.754703  |
| 9  | 6 | 0 | -1.686796 | 0.896574  | 0.874296  |
| 10 | 6 | 0 | -2.581936 | -0.162470 | 0.933815  |
| 11 | 6 | 0 | -2.102124 | -1.484219 | 0.871975  |
| 12 | 6 | 0 | -0.738823 | -1.716600 | 0.761549  |
| 13 | 6 | 0 | 0.178521  | -0.653671 | 0.698846  |
| 14 | 6 | 0 | 1.689394  | -0.881046 | 0.632307  |
| 15 | 6 | 0 | 4.292020  | 1.774577  | 0.214532  |
| 16 | 6 | 0 | 2.964886  | 2.566277  | 0.349925  |
| 17 | 8 | 0 | 1.714172  | -3.355925 | 0.273150  |
| 18 | 8 | 0 | 4.333809  | -2.982072 | -1.118659 |
| 19 | 8 | 0 | -2.973965 | -2.532898 | 0.926499  |
| 20 | 8 | 0 | -3.949992 | -0.067808 | 1.052593  |
| 21 | 6 | 0 | -4.528228 | 1.225370  | 1.117870  |
| 22 | 1 | 0 | 1.984099  | -3.496939 | 1.195619  |
| 23 | 1 | 0 | 4.237394  | -2.491768 | -1.951303 |
| 24 | 1 | 0 | -3.866525 | -2.152881 | 1.000706  |
| 25 | 1 | 0 | 1.942222  | -2.015639 | -1.195617 |
| 26 | 1 | 0 | 4.063228  | -2.697293 | 0.836009  |
| 27 | 1 | 0 | 5.584403  | -0.843739 | -0.013735 |
| 28 | 1 | 0 | 1.957220  | 0.452372  | -1.034673 |
| 29 | 1 | 0 | 0.403239  | 2.376127  | -0.351871 |
| 30 | 1 | 0 | 0.319165  | 2.637187  | 1.395671  |
| 31 | 1 | 0 | -2.048416 | 1.919816  | 0.916388  |
| 32 | 1 | 0 | -0.389963 | -2.739958 | 0.704935  |
| 33 | 1 | 0 | 2.073537  | -0.945448 | 1.663904  |
| 34 | 1 | 0 | 4.902977  | 2.145642  | -0.616173 |
| 35 | 1 | 0 | 4.897678  | 1.855960  | 1.124261  |
| 36 | 1 | 0 | 3.022773  | 3.384738  | 1.075850  |
| 37 | 1 | 0 | 2.684347  | 3.006780  | -0.627941 |
| 38 | 1 | 0 | -4.316838 | 1.803350  | 0.208741  |
| 39 | 1 | 0 | -4.164405 | 1.781262  | 1.991841  |

|    |   |   |           |          |          |
|----|---|---|-----------|----------|----------|
| 40 | 1 | 0 | -5.605312 | 1.072740 | 1.208088 |
|----|---|---|-----------|----------|----------|

-----

Cartesian coordinate of SSRR\_c5:

-----

| Center | Atomic | Atomic | Coordinates (Angstroms) |   |   |
|--------|--------|--------|-------------------------|---|---|
| Number | Number | Type   | X                       | Y | Z |

-----

|    |   |   |           |           |           |
|----|---|---|-----------|-----------|-----------|
| 1  | 6 | 0 | 2.218632  | -1.708613 | -0.805079 |
| 2  | 6 | 0 | 3.754876  | -1.760333 | -0.715845 |
| 3  | 6 | 0 | 4.431823  | -0.411497 | -0.769269 |
| 4  | 6 | 0 | 3.739887  | 0.727746  | -0.715057 |
| 5  | 6 | 0 | 2.230649  | 0.742251  | -0.661276 |
| 6  | 7 | 0 | 1.890422  | 2.007360  | 0.020175  |
| 7  | 6 | 0 | 0.800809  | 1.917554  | 0.993310  |
| 8  | 6 | 0 | -0.252782 | 0.913521  | 0.573621  |
| 9  | 6 | 0 | -1.617747 | 1.209497  | 0.673338  |
| 10 | 6 | 0 | -2.565390 | 0.255042  | 0.316011  |
| 11 | 6 | 0 | -2.152390 | -1.006258 | -0.151572 |
| 12 | 6 | 0 | -0.796733 | -1.300635 | -0.255345 |
| 13 | 6 | 0 | 0.160564  | -0.347367 | 0.108784  |
| 14 | 6 | 0 | 1.664577  | -0.532520 | 0.005683  |
| 15 | 6 | 0 | 4.204280  | 2.140496  | -0.473618 |
| 16 | 6 | 0 | 3.122908  | 2.629019  | 0.512534  |
| 17 | 8 | 0 | 1.695662  | -2.950590 | -0.343940 |
| 18 | 8 | 0 | 4.154271  | -2.661005 | -1.766402 |
| 19 | 8 | 0 | -3.081772 | -1.940948 | -0.506811 |
| 20 | 8 | 0 | -3.933769 | 0.411396  | 0.363409  |
| 21 | 6 | 0 | -4.449100 | 1.651470  | 0.817493  |
| 22 | 1 | 0 | 2.154318  | -3.630080 | -0.867003 |
| 23 | 1 | 0 | 5.083574  | -2.896848 | -1.622741 |
| 24 | 1 | 0 | -3.954915 | -1.537741 | -0.359106 |



|    |   |   |           |           |           |
|----|---|---|-----------|-----------|-----------|
| 25 | 1 | 0 | 1.955256  | -1.560692 | -1.865484 |
| 26 | 1 | 0 | 3.994621  | -2.226253 | 0.255497  |
| 27 | 1 | 0 | 5.522531  | -0.405550 | -0.745146 |
| 28 | 1 | 0 | 1.816124  | 0.771120  | -1.682844 |
| 29 | 1 | 0 | 0.348548  | 2.910058  | 1.122161  |
| 30 | 1 | 0 | 1.197009  | 1.629993  | 1.990973  |
| 31 | 1 | 0 | -1.926666 | 2.188649  | 1.025497  |
| 32 | 1 | 0 | -0.496793 | -2.282232 | -0.600883 |
| 33 | 1 | 0 | 2.082052  | -0.601347 | 1.023291  |
| 34 | 1 | 0 | 4.157894  | 2.733477  | -1.397167 |
| 35 | 1 | 0 | 5.219332  | 2.209024  | -0.071352 |
| 36 | 1 | 0 | 3.376892  | 2.298225  | 1.539275  |
| 37 | 1 | 0 | 3.025426  | 3.721697  | 0.534879  |
| 38 | 1 | 0 | -4.128219 | 2.478413  | 0.170531  |
| 39 | 1 | 0 | -4.137785 | 1.859401  | 1.849627  |
| 40 | 1 | 0 | -5.536396 | 1.561852  | 0.778260  |

#### 5.2.6. SSRS configuration

| Conformer   | Population (%) |
|-------------|----------------|
| SSRS_c0.log | 60.498         |
| SSRS_c1.log | 39.502         |

Cartesian coordinate of SSRS\_c0:

| Center<br>Number | Atomic<br>Number | Atomic<br>Type | Coordinates (Angstroms) |           |           |
|------------------|------------------|----------------|-------------------------|-----------|-----------|
|                  |                  |                | X                       | Y         | Z         |
| 1                | 6                | 0              | 2.499059                | -1.788317 | 0.501788  |
| 2                | 6                | 0              | 4.042603                | -1.861995 | 0.451493  |
| 3                | 6                | 0              | 4.632041                | -0.467383 | 0.443941  |
| 4                | 6                | 0              | 3.961670                | 0.557654  | -0.084452 |

|    |   |   |           |           |           |
|----|---|---|-----------|-----------|-----------|
| 5  | 6 | 0 | 2.593430  | 0.421852  | -0.708739 |
| 6  | 7 | 0 | 1.850846  | 1.357431  | 0.158121  |
| 7  | 6 | 0 | 0.490601  | 1.589596  | -0.301119 |
| 8  | 6 | 0 | -0.236506 | 0.282791  | -0.557150 |
| 9  | 6 | 0 | -1.640868 | 0.295315  | -0.623446 |
| 10 | 6 | 0 | -2.344355 | -0.865838 | -0.909233 |
| 11 | 6 | 0 | -1.647917 | -2.070678 | -1.138359 |
| 12 | 6 | 0 | -0.263906 | -2.080264 | -1.070473 |
| 13 | 6 | 0 | 0.459099  | -0.912031 | -0.776739 |
| 14 | 6 | 0 | 1.976702  | -0.981458 | -0.707407 |
| 15 | 6 | 0 | 4.163504  | 2.039903  | 0.137237  |
| 16 | 6 | 0 | 2.696404  | 2.563831  | 0.244972  |
| 17 | 8 | 0 | 2.070021  | -1.253278 | 1.742073  |
| 18 | 8 | 0 | 4.384198  | -2.651682 | -0.699185 |
| 19 | 8 | 0 | -2.333777 | -3.213570 | -1.426513 |
| 20 | 8 | 0 | -3.712000 | -0.989407 | -1.001083 |
| 21 | 6 | 0 | -4.504349 | 0.164177  | -0.771748 |
| 22 | 1 | 0 | 1.988222  | -0.287222 | 1.623317  |
| 23 | 1 | 0 | 5.333030  | -2.538919 | -0.862111 |
| 24 | 1 | 0 | -3.279371 | -2.984194 | -1.417269 |
| 25 | 1 | 0 | 2.117465  | -2.814426 | 0.444335  |
| 26 | 1 | 0 | 4.372891  | -2.373673 | 1.367583  |
| 27 | 1 | 0 | 5.558652  | -0.293861 | 0.991272  |
| 28 | 1 | 0 | 2.620226  | 0.802757  | -1.752460 |
| 29 | 1 | 0 | 0.491865  | 2.202673  | -1.228018 |
| 30 | 1 | 0 | -0.042385 | 2.177677  | 0.457401  |
| 31 | 1 | 0 | -2.170214 | 1.226840  | -0.446745 |
| 32 | 1 | 0 | 0.252311  | -3.018849 | -1.251712 |
| 33 | 1 | 0 | 2.348819  | -1.504621 | -1.595961 |
| 34 | 1 | 0 | 4.673286  | 2.518239  | -0.708414 |
| 35 | 1 | 0 | 4.754159  | 2.243423  | 1.035009  |
| 36 | 1 | 0 | 2.501509  | 3.097195  | 1.181449  |

|    |   |   |           |           |           |
|----|---|---|-----------|-----------|-----------|
| 37 | 1 | 0 | 2.475582  | 3.257283  | -0.585595 |
| 38 | 1 | 0 | -4.351285 | 0.557271  | 0.241672  |
| 39 | 1 | 0 | -5.542727 | -0.152582 | -0.885314 |
| 40 | 1 | 0 | -4.281678 | 0.952436  | -1.502786 |

-----

Cartesian coordinate of SSRS\_c1:

-----

| Center<br>Number | Atomic<br>Number | Atomic<br>Type | Coordinates (Angstroms) |           |           |
|------------------|------------------|----------------|-------------------------|-----------|-----------|
|                  |                  |                | X                       | Y         | Z         |
| 1                | 6                | 0              | 2.488230                | -1.671297 | 0.467282  |
| 2                | 6                | 0              | 4.035818                | -1.750256 | 0.395325  |
| 3                | 6                | 0              | 4.631655                | -0.363924 | 0.391910  |
| 4                | 6                | 0              | 3.949942                | 0.675153  | -0.089503 |
| 5                | 6                | 0              | 2.569376                | 0.561442  | -0.686324 |
| 6                | 7                | 0              | 1.843346                | 1.468204  | 0.224018  |
| 7                | 6                | 0              | 0.476499                | 1.717449  | -0.205912 |
| 8                | 6                | 0              | -0.255794               | 0.420743  | -0.499175 |
| 9                | 6                | 0              | -1.660842               | 0.437337  | -0.548081 |
| 10               | 6                | 0              | -2.370479               | -0.711493 | -0.867008 |
| 11               | 6                | 0              | -1.679496               | -1.908260 | -1.148465 |
| 12               | 6                | 0              | -0.294844               | -1.921836 | -1.097963 |
| 13               | 6                | 0              | 0.434532                | -0.766791 | -0.770414 |
| 14               | 6                | 0              | 1.952245                | -0.839708 | -0.717488 |
| 15               | 6                | 0              | 4.159114                | 2.151175  | 0.163229  |
| 16               | 6                | 0              | 2.695263                | 2.669924  | 0.336671  |
| 17               | 8                | 0              | 2.073582                | -1.164761 | 1.724073  |
| 18               | 8                | 0              | 4.478449                | -2.467732 | -0.766668 |
| 19               | 8                | 0              | -2.370650               | -3.039234 | -1.469595 |
| 20               | 8                | 0              | -3.739102               | -0.829702 | -0.946502 |
| 21               | 6                | 0              | -4.526662               | 0.316867  | -0.669004 |

|    |   |   |           |           |           |
|----|---|---|-----------|-----------|-----------|
| 22 | 1 | 0 | 1.995176  | -0.195054 | 1.627393  |
| 23 | 1 | 0 | 4.215907  | -3.395359 | -0.647972 |
| 24 | 1 | 0 | -3.315658 | -2.808631 | -1.442500 |
| 25 | 1 | 0 | 2.092658  | -2.695010 | 0.395977  |
| 26 | 1 | 0 | 4.373821  | -2.262938 | 1.308307  |
| 27 | 1 | 0 | 5.585582  | -0.215767 | 0.894740  |
| 28 | 1 | 0 | 2.575189  | 0.974424  | -1.717798 |
| 29 | 1 | 0 | 0.463812  | 2.362985  | -1.110239 |
| 30 | 1 | 0 | -0.045602 | 2.277565  | 0.580801  |
| 31 | 1 | 0 | -2.186160 | 1.362723  | -0.331680 |
| 32 | 1 | 0 | 0.216303  | -2.854325 | -1.320972 |
| 33 | 1 | 0 | 2.319283  | -1.339245 | -1.622393 |
| 34 | 1 | 0 | 4.636977  | 2.652124  | -0.687798 |
| 35 | 1 | 0 | 4.781043  | 2.333539  | 1.044130  |
| 36 | 1 | 0 | 2.528891  | 3.162821  | 1.300433  |
| 37 | 1 | 0 | 2.450281  | 3.397775  | -0.456426 |
| 38 | 1 | 0 | -4.361329 | 0.674737  | 0.355434  |
| 39 | 1 | 0 | -5.566795 | 0.005665  | -0.781518 |
| 40 | 1 | 0 | -4.310551 | 1.129050  | -1.375312 |

#### 5.2.7. SSSR configuration

| Conformer   | Population (%) |
|-------------|----------------|
| SSSR_c0.log | 40.592         |
| SSSR_c2.log | 35.402         |
| SSSR_c1.log | 22.945         |
| SSSR_c3.log | 1.061          |

Cartesian coordinate of SSSR\_c0:

| Center<br>Number | Atomic<br>Number | Atomic<br>Type | Coordinates (Angstroms) |   |   |
|------------------|------------------|----------------|-------------------------|---|---|
|                  |                  |                | X                       | Y | Z |

|    |   |   |           |           |           |
|----|---|---|-----------|-----------|-----------|
| 1  | 6 | 0 | -0.782020 | -1.748217 | 3.287082  |
| 2  | 6 | 0 | 0.761840  | -1.792615 | 3.210151  |
| 3  | 6 | 0 | 1.393162  | -0.423240 | 3.260514  |
| 4  | 6 | 0 | 0.673574  | 0.687793  | 3.098823  |
| 5  | 6 | 0 | -0.817738 | 0.699965  | 2.802623  |
| 6  | 7 | 0 | -0.964818 | 1.785787  | 1.806549  |
| 7  | 6 | 0 | -0.439019 | 1.394494  | 0.488550  |
| 8  | 6 | 0 | -0.966932 | 0.063582  | 0.006464  |
| 9  | 6 | 0 | -1.012921 | -0.184034 | -1.377581 |
| 10 | 6 | 0 | -1.457542 | -1.404540 | -1.864180 |
| 11 | 6 | 0 | -1.878872 | -2.405041 | -0.963802 |
| 12 | 6 | 0 | -1.837774 | -2.157227 | 0.398996  |
| 13 | 6 | 0 | -1.369385 | -0.929592 | 0.905620  |
| 14 | 6 | 0 | -1.423400 | -0.653138 | 2.402436  |
| 15 | 6 | 0 | 1.133292  | 2.131205  | 3.010397  |
| 16 | 6 | 0 | -0.112881 | 2.844987  | 2.387045  |
| 17 | 8 | 0 | -1.220365 | -1.453608 | 4.616495  |
| 18 | 8 | 0 | 1.211394  | -2.532517 | 2.069648  |
| 19 | 8 | 0 | -2.333644 | -3.601648 | -1.432550 |
| 20 | 8 | 0 | -1.553303 | -1.770828 | -3.185721 |
| 21 | 6 | 0 | -1.170983 | -0.824909 | -4.172181 |
| 22 | 1 | 0 | -0.817896 | -2.104959 | 5.211867  |
| 23 | 1 | 0 | 0.955470  | -2.019426 | 1.285232  |
| 24 | 1 | 0 | -2.284869 | -3.561597 | -2.403590 |
| 25 | 1 | 0 | -1.145952 | -2.737745 | 2.978665  |
| 26 | 1 | 0 | 1.112616  | -2.393097 | 4.062486  |
| 27 | 1 | 0 | 2.475553  | -0.391111 | 3.381533  |
| 28 | 1 | 0 | -1.341272 | 1.039013  | 3.706991  |
| 29 | 1 | 0 | 0.668129  | 1.351858  | 0.481270  |
| 30 | 1 | 0 | -0.717867 | 2.181501  | -0.223292 |
| 31 | 1 | 0 | -0.701294 | 0.598423  | -2.062631 |
| 32 | 1 | 0 | -2.186629 | -2.941287 | 1.063381  |

|    |   |   |           |           |           |
|----|---|---|-----------|-----------|-----------|
| 33 | 1 | 0 | -2.483868 | -0.639768 | 2.686350  |
| 34 | 1 | 0 | 2.029982  | 2.234493  | 2.389321  |
| 35 | 1 | 0 | 1.380472  | 2.544085  | 3.996240  |
| 36 | 1 | 0 | -0.686778 | 3.357519  | 3.167547  |
| 37 | 1 | 0 | 0.146904  | 3.585319  | 1.624878  |
| 38 | 1 | 0 | -0.114421 | -0.546451 | -4.067635 |
| 39 | 1 | 0 | -1.791010 | 0.079100  | -4.117723 |
| 40 | 1 | 0 | -1.324078 | -1.313128 | -5.136215 |

-----

Cartesian coordinate of SSSR\_c2:

-----

| Center | Atomic | Atomic | Coordinates (Angstroms) |           |           |
|--------|--------|--------|-------------------------|-----------|-----------|
| Number | Number | Type   | X                       | Y         | Z         |
| -----  |        |        |                         |           |           |
| 1      | 6      | 0      | -0.753904               | -1.642562 | 3.348459  |
| 2      | 6      | 0      | 0.783181                | -1.689174 | 3.230105  |
| 3      | 6      | 0      | 1.388833                | -0.303656 | 3.313150  |
| 4      | 6      | 0      | 0.656351                | 0.798779  | 3.127349  |
| 5      | 6      | 0      | -0.828802               | 0.793140  | 2.780763  |
| 6      | 7      | 0      | -0.939284               | 1.836376  | 1.738458  |
| 7      | 6      | 0      | -0.377138               | 1.386051  | 0.454463  |
| 8      | 6      | 0      | -0.924820               | 0.050084  | 0.009455  |
| 9      | 6      | 0      | -0.959702               | -0.246984 | -1.365390 |
| 10     | 6      | 0      | -1.433328               | -1.471782 | -1.812190 |
| 11     | 6      | 0      | -1.895921               | -2.426191 | -0.881461 |
| 12     | 6      | 0      | -1.864231               | -2.130049 | 0.471692  |
| 13     | 6      | 0      | -1.367400               | -0.897840 | 0.938340  |
| 14     | 6      | 0      | -1.419698               | -0.580027 | 2.426018  |
| 15     | 6      | 0      | 1.106857                | 2.243689  | 3.015896  |
| 16     | 6      | 0      | -0.109980               | 2.922842  | 2.301429  |
| 17     | 8      | 0      | -1.132394               | -1.409695 | 4.707962  |

|    |   |   |           |           |           |
|----|---|---|-----------|-----------|-----------|
| 18 | 8 | 0 | 1.228225  | -2.372641 | 2.056269  |
| 19 | 8 | 0 | -2.379444 | -3.624705 | -1.312826 |
| 20 | 8 | 0 | -1.522939 | -1.884279 | -3.120030 |
| 21 | 6 | 0 | -1.097868 | -0.988895 | -4.135895 |
| 22 | 1 | 0 | -0.579639 | -0.682889 | 5.038652  |
| 23 | 1 | 0 | 0.918690  | -1.857866 | 1.292509  |
| 24 | 1 | 0 | -2.314951 | -3.623416 | -2.283798 |
| 25 | 1 | 0 | -1.138674 | -2.636692 | 3.108201  |
| 26 | 1 | 0 | 1.143756  | -2.309216 | 4.058827  |
| 27 | 1 | 0 | 2.467574  | -0.248641 | 3.456867  |
| 28 | 1 | 0 | -1.386299 | 1.179526  | 3.647463  |
| 29 | 1 | 0 | 0.728602  | 1.321830  | 0.487362  |
| 30 | 1 | 0 | -0.616326 | 2.151231  | -0.294191 |
| 31 | 1 | 0 | -0.618640 | 0.500685  | -2.074780 |
| 32 | 1 | 0 | -2.241884 | -2.878457 | 1.161360  |
| 33 | 1 | 0 | -2.478266 | -0.573622 | 2.715307  |
| 34 | 1 | 0 | 2.034955  | 2.332342  | 2.441006  |
| 35 | 1 | 0 | 1.297253  | 2.694350  | 3.997924  |
| 36 | 1 | 0 | -0.716458 | 3.476924  | 3.027081  |
| 37 | 1 | 0 | 0.186034  | 3.621693  | 1.514073  |
| 38 | 1 | 0 | -0.034924 | -0.738505 | -4.025542 |
| 39 | 1 | 0 | -1.690956 | -0.065443 | -4.125567 |
| 40 | 1 | 0 | -1.251992 | -1.509240 | -5.082752 |

-----

Cartesian coordinate of SSSR\_c1:

-----

| Center<br>Number | Atomic<br>Number | Atomic<br>Type | Coordinates (Angstroms) |           |          |
|------------------|------------------|----------------|-------------------------|-----------|----------|
|                  |                  |                | X                       | Y         | Z        |
| -----            |                  |                |                         |           |          |
| 1                | 6                | 0              | -0.788435               | -1.756215 | 3.546889 |
| 2                | 6                | 0              | 0.750016                | -1.807606 | 3.463579 |

|    |   |   |           |           |           |
|----|---|---|-----------|-----------|-----------|
| 3  | 6 | 0 | 1.386460  | -0.440293 | 3.498099  |
| 4  | 6 | 0 | 0.672508  | 0.674307  | 3.338323  |
| 5  | 6 | 0 | -0.821824 | 0.693362  | 3.058991  |
| 6  | 7 | 0 | -0.981570 | 1.785456  | 2.072578  |
| 7  | 6 | 0 | -0.472256 | 1.402137  | 0.745076  |
| 8  | 6 | 0 | -0.997270 | 0.070347  | 0.262550  |
| 9  | 6 | 0 | -1.049454 | -0.174097 | -1.121773 |
| 10 | 6 | 0 | -1.489971 | -1.395899 | -1.609079 |
| 11 | 6 | 0 | -1.899924 | -2.401619 | -0.709099 |
| 12 | 6 | 0 | -1.852047 | -2.157239 | 0.654085  |
| 13 | 6 | 0 | -1.388909 | -0.927748 | 1.160783  |
| 14 | 6 | 0 | -1.433143 | -0.656221 | 2.658564  |
| 15 | 6 | 0 | 1.135857  | 2.116705  | 3.247360  |
| 16 | 6 | 0 | -0.117355 | 2.838348  | 2.648130  |
| 17 | 8 | 0 | -1.101376 | -1.514972 | 4.922135  |
| 18 | 8 | 0 | 1.187866  | -2.551970 | 2.321222  |
| 19 | 8 | 0 | -2.350436 | -3.599406 | -1.178213 |
| 20 | 8 | 0 | -1.591512 | -1.759032 | -2.930700 |
| 21 | 6 | 0 | -1.213566 | -0.810965 | -3.917023 |
| 22 | 1 | 0 | -2.066338 | -1.551143 | 5.014622  |
| 23 | 1 | 0 | 0.955299  | -2.027600 | 1.537334  |
| 24 | 1 | 0 | -2.303064 | -3.558696 | -2.149316 |
| 25 | 1 | 0 | -1.154108 | -2.746431 | 3.245235  |
| 26 | 1 | 0 | 1.085377  | -2.398874 | 4.322753  |
| 27 | 1 | 0 | 2.469535  | -0.413380 | 3.612731  |
| 28 | 1 | 0 | -1.331690 | 1.029339  | 3.973058  |
| 29 | 1 | 0 | 0.634610  | 1.365528  | 0.723270  |
| 30 | 1 | 0 | -0.764733 | 2.191135  | 0.040921  |
| 31 | 1 | 0 | -0.746088 | 0.611721  | -1.806685 |
| 32 | 1 | 0 | -2.188207 | -2.947453 | 1.317700  |
| 33 | 1 | 0 | -2.500139 | -0.631945 | 2.932126  |
| 34 | 1 | 0 | 2.022134  | 2.219573  | 2.611397  |



|    |   |   |           |           |           |
|----|---|---|-----------|-----------|-----------|
| 35 | 1 | 0 | 1.401380  | 2.525138  | 4.230185  |
| 36 | 1 | 0 | -0.678262 | 3.346702  | 3.440823  |
| 37 | 1 | 0 | 0.132166  | 3.583706  | 1.887464  |
| 38 | 1 | 0 | -0.157415 | -0.530420 | -3.814466 |
| 39 | 1 | 0 | -1.835583 | 0.091493  | -3.860042 |
| 40 | 1 | 0 | -1.367896 | -1.298467 | -4.881181 |

-----

Cartesian coordinate of SSSR\_c3:

-----

| Center | Atomic | Atomic | Coordinates (Angstroms) |           |           |
|--------|--------|--------|-------------------------|-----------|-----------|
| Number | Number | Type   | X                       | Y         | Z         |
| -----  |        |        |                         |           |           |
| 1      | 6      | 0      | -0.742756               | -1.471800 | 3.358178  |
| 2      | 6      | 0      | 0.797071                | -1.505884 | 3.280303  |
| 3      | 6      | 0      | 1.386223                | -0.118288 | 3.355910  |
| 4      | 6      | 0      | 0.653457                | 0.967143  | 3.099103  |
| 5      | 6      | 0      | -0.813737               | 0.942292  | 2.685896  |
| 6      | 7      | 0      | -0.865602               | 1.910658  | 1.569796  |
| 7      | 6      | 0      | -0.261163               | 1.352056  | 0.347121  |
| 8      | 6      | 0      | -0.879323               | 0.031275  | -0.043153 |
| 9      | 6      | 0      | -0.919996               | -0.336912 | -1.398578 |
| 10     | 6      | 0      | -1.449712               | -1.560850 | -1.782254 |
| 11     | 6      | 0      | -1.972216               | -2.433699 | -0.806960 |
| 12     | 6      | 0      | -1.941576               | -2.061541 | 0.528040  |
| 13     | 6      | 0      | -1.377417               | -0.838245 | 0.929147  |
| 14     | 6      | 0      | -1.406958               | -0.447201 | 2.397224  |
| 15     | 6      | 0      | 1.107570                | 2.404885  | 2.937567  |
| 16     | 6      | 0      | -0.051731               | 3.029873  | 2.089201  |
| 17     | 8      | 0      | -1.143154               | -1.219320 | 4.707332  |
| 18     | 8      | 0      | 1.284507                | -2.080736 | 2.064605  |
| 19     | 8      | 0      | -2.515846               | -3.629856 | -1.177446 |

|    |   |   |           |           |           |
|----|---|---|-----------|-----------|-----------|
| 20 | 8 | 0 | -1.549207 | -2.041594 | -3.068650 |
| 21 | 6 | 0 | -1.063928 | -1.228059 | -4.124180 |
| 22 | 1 | 0 | -0.621477 | -0.461855 | 5.020273  |
| 23 | 1 | 0 | 0.949596  | -2.990801 | 2.012699  |
| 24 | 1 | 0 | -2.448521 | -3.679024 | -2.146993 |
| 25 | 1 | 0 | -1.126401 | -2.473864 | 3.136671  |
| 26 | 1 | 0 | 1.138449  | -2.102854 | 4.142290  |
| 27 | 1 | 0 | 2.457203  | -0.048392 | 3.540782  |
| 28 | 1 | 0 | -1.402302 | 1.394254  | 3.499500  |
| 29 | 1 | 0 | 0.832575  | 1.214510  | 0.450962  |
| 30 | 1 | 0 | -0.409883 | 2.085014  | -0.455093 |
| 31 | 1 | 0 | -0.533046 | 0.350986  | -2.144066 |
| 32 | 1 | 0 | -2.379774 | -2.742416 | 1.252634  |
| 33 | 1 | 0 | -2.461358 | -0.426917 | 2.701284  |
| 34 | 1 | 0 | 2.077922  | 2.463556  | 2.433597  |
| 35 | 1 | 0 | 1.216452  | 2.916540  | 3.902227  |
| 36 | 1 | 0 | -0.691679 | 3.654770  | 2.723081  |
| 37 | 1 | 0 | 0.306375  | 3.652043  | 1.264272  |
| 38 | 1 | 0 | 0.009415  | -1.027615 | -4.011074 |
| 39 | 1 | 0 | -1.606149 | -0.274841 | -4.174383 |
| 40 | 1 | 0 | -1.233257 | -1.790573 | -5.044220 |

-----

#### 5.2.8. SSSS configuration

| Conformer    | Population (%) |
|--------------|----------------|
| SSSS_c1.log  | 63.651         |
| SSSS_c3.log  | 20.554         |
| SSSS_c6.log  | 12.714         |
| SSSS_c12.log | 3.081          |

Cartesian coordinate of SSSS\_c1:

-----

| Center | Atomic | Atomic | Coordinates (Angstroms) |
|--------|--------|--------|-------------------------|
|--------|--------|--------|-------------------------|

| Number | Number | Type | X         | Y         | Z         |
|--------|--------|------|-----------|-----------|-----------|
| -----  |        |      |           |           |           |
| 1      | 6      | 0    | 1.781798  | 2.089820  | 0.717547  |
| 2      | 6      | 0    | 3.232259  | 2.129691  | 1.279264  |
| 3      | 6      | 0    | 4.152865  | 1.032351  | 0.783110  |
| 4      | 6      | 0    | 3.725207  | 0.040986  | -0.005669 |
| 5      | 6      | 0    | 2.314085  | 0.013123  | -0.503108 |
| 6      | 7      | 0    | 2.032260  | -1.402379 | -0.704397 |
| 7      | 6      | 0    | 0.806176  | -1.567677 | -1.469228 |
| 8      | 6      | 0    | -0.314627 | -0.673100 | -0.940764 |
| 9      | 6      | 0    | -1.623456 | -0.926331 | -1.386721 |
| 10     | 6      | 0    | -2.686051 | -0.127431 | -0.977580 |
| 11     | 6      | 0    | -2.453874 | 0.948157  | -0.099303 |
| 12     | 6      | 0    | -1.164148 | 1.197830  | 0.350685  |
| 13     | 6      | 0    | -0.081678 | 0.403206  | -0.063616 |
| 14     | 6      | 0    | 1.327386  | 0.640826  | 0.460864  |
| 15     | 6      | 0    | 4.394623  | -1.233157 | -0.496340 |
| 16     | 6      | 0    | 3.263795  | -1.951338 | -1.282966 |
| 17     | 8      | 0    | 1.783429  | 2.876402  | -0.480093 |
| 18     | 8      | 0    | 3.209295  | 2.117798  | 2.719736  |
| 19     | 8      | 0    | -3.486104 | 1.739375  | 0.316774  |
| 20     | 8      | 0    | -4.002577 | -0.277471 | -1.346961 |
| 21     | 6      | 0    | -4.344797 | -1.342878 | -2.226610 |
| 22     | 1      | 0    | 2.263980  | 0.561959  | -1.468030 |
| 23     | 1      | 0    | 1.424486  | 0.105197  | 1.418091  |
| 24     | 1      | 0    | 1.153799  | 2.569860  | 1.478400  |
| 25     | 1      | 0    | 3.632284  | 3.115221  | 1.018047  |
| 26     | 1      | 0    | 5.172097  | 1.064580  | 1.165006  |
| 27     | 1      | 0    | 0.977503  | -1.321892 | -2.540265 |
| 28     | 1      | 0    | 0.490978  | -2.617780 | -1.432395 |
| 29     | 1      | 0    | -1.797445 | -1.759397 | -2.060490 |
| 30     | 1      | 0    | -1.020974 | 2.019897  | 1.045450  |

|    |   |   |           |           |           |
|----|---|---|-----------|-----------|-----------|
| 31 | 1 | 0 | 4.729314  | -1.839443 | 0.352721  |
| 32 | 1 | 0 | 5.268839  | -1.040314 | -1.126975 |
| 33 | 1 | 0 | 3.340579  | -1.707833 | -2.361270 |
| 34 | 1 | 0 | 3.293694  | -3.040935 | -1.182354 |
| 35 | 1 | 0 | 0.893290  | 2.861333  | -0.858480 |
| 36 | 1 | 0 | 3.159716  | 1.197751  | 3.013978  |
| 37 | 1 | 0 | -4.301496 | 1.409888  | -0.091566 |
| 38 | 1 | 0 | -5.422383 | -1.272402 | -2.378429 |
| 39 | 1 | 0 | -3.831701 | -1.238837 | -3.190312 |
| 40 | 1 | 0 | -4.100324 | -2.315158 | -1.782052 |

-----

Cartesian coordinate of SSSS\_c3:

-----

| Center | Atomic | Atomic | Coordinates (Angstroms) |           |           |
|--------|--------|--------|-------------------------|-----------|-----------|
| Number | Number | Type   | X                       | Y         | Z         |
| -----  |        |        |                         |           |           |
| 1      | 6      | 0      | 1.325069                | 0.098402  | -2.252681 |
| 2      | 6      | 0      | 1.648044                | -1.055322 | -3.250181 |
| 3      | 6      | 0      | 0.567151                | -2.101460 | -3.414451 |
| 4      | 6      | 0      | -0.593693               | -2.042370 | -2.758350 |
| 5      | 6      | 0      | -0.885925               | -0.910590 | -1.824150 |
| 6      | 7      | 0      | -1.803939               | -1.482059 | -0.847474 |
| 7      | 6      | 0      | -2.407190               | -0.430891 | -0.045815 |
| 8      | 6      | 0      | -1.361680               | 0.568092  | 0.448578  |
| 9      | 6      | 0      | -1.737362               | 1.466099  | 1.462565  |
| 10     | 6      | 0      | -0.848118               | 2.425791  | 1.935006  |
| 11     | 6      | 0      | 0.450474                | 2.498987  | 1.397030  |
| 12     | 6      | 0      | 0.829393                | 1.608863  | 0.400869  |
| 13     | 6      | 0      | -0.062966               | 0.640795  | -0.091041 |
| 14     | 6      | 0      | 0.359032                | -0.367988 | -1.150648 |
| 15     | 6      | 0      | -1.759258               | -3.014066 | -2.661920 |

|    |   |   |           |           |           |
|----|---|---|-----------|-----------|-----------|
| 16 | 6 | 0 | -2.702047 | -2.338498 | -1.628781 |
| 17 | 8 | 0 | 0.792274  | 1.176080  | -3.032313 |
| 18 | 8 | 0 | 2.825611  | -1.772390 | -2.831636 |
| 19 | 8 | 0 | 1.338918  | 3.431508  | 1.852132  |
| 20 | 8 | 0 | -1.102807 | 3.353574  | 2.918511  |
| 21 | 6 | 0 | -2.385290 | 3.354940  | 3.535848  |
| 22 | 1 | 0 | -1.378806 | -0.087932 | -2.386344 |
| 23 | 1 | 0 | 0.851377  | -1.213817 | -0.649483 |
| 24 | 1 | 0 | 2.284223  | 0.405249  | -1.811209 |
| 25 | 1 | 0 | 1.841680  | -0.571579 | -4.218790 |
| 26 | 1 | 0 | 0.820998  | -2.933523 | -4.067643 |
| 27 | 1 | 0 | -3.172949 | 0.121577  | -0.634086 |
| 28 | 1 | 0 | -2.927728 | -0.876652 | 0.810854  |
| 29 | 1 | 0 | -2.738542 | 1.401898  | 1.877009  |
| 30 | 1 | 0 | 1.845606  | 1.675886  | 0.024292  |
| 31 | 1 | 0 | -1.412925 | -3.988187 | -2.299228 |
| 32 | 1 | 0 | -2.260498 | -3.178642 | -3.621556 |
| 33 | 1 | 0 | -3.470869 | -1.737251 | -2.154221 |
| 34 | 1 | 0 | -3.220062 | -3.055731 | -0.984077 |
| 35 | 1 | 0 | 0.502550  | 1.876041  | -2.430222 |
| 36 | 1 | 0 | 3.602560  | -1.227850 | -3.016737 |
| 37 | 1 | 0 | 0.901899  | 3.949390  | 2.545641  |
| 38 | 1 | 0 | -2.362239 | 4.157304  | 4.274019  |
| 39 | 1 | 0 | -3.175871 | 3.554709  | 2.802401  |
| 40 | 1 | 0 | -2.581996 | 2.400211  | 4.038383  |

-----

Cartesian coordinate of SSSS\_c6:

-----

| Center | Atomic | Atomic | Coordinates (Angstroms) |   |   |
|--------|--------|--------|-------------------------|---|---|
| Number | Number | Type   | X                       | Y | Z |

-----

|    |   |   |           |           |           |
|----|---|---|-----------|-----------|-----------|
| 1  | 6 | 0 | 1.464100  | -2.468532 | -0.593935 |
| 2  | 6 | 0 | 0.997635  | -3.959344 | -0.589037 |
| 3  | 6 | 0 | -0.471462 | -4.172835 | -0.284858 |
| 4  | 6 | 0 | -1.276873 | -3.168973 | 0.079024  |
| 5  | 6 | 0 | -0.775292 | -1.759338 | 0.140771  |
| 6  | 7 | 0 | -1.587063 | -1.145770 | 1.185087  |
| 7  | 6 | 0 | -1.416206 | 0.299204  | 1.175591  |
| 8  | 6 | 0 | 0.057383  | 0.693057  | 1.092747  |
| 9  | 6 | 0 | 0.396853  | 2.027313  | 1.378006  |
| 10 | 6 | 0 | 1.712876  | 2.465184  | 1.279401  |
| 11 | 6 | 0 | 2.721792  | 1.563146  | 0.892391  |
| 12 | 6 | 0 | 2.391713  | 0.244395  | 0.615689  |
| 13 | 6 | 0 | 1.066337  | -0.207144 | 0.704403  |
| 14 | 6 | 0 | 0.702535  | -1.665304 | 0.468565  |
| 15 | 6 | 0 | -2.709738 | -3.153436 | 0.587287  |
| 16 | 6 | 0 | -2.940685 | -1.662738 | 0.958851  |
| 17 | 8 | 0 | 1.222489  | -1.856527 | -1.865612 |
| 18 | 8 | 0 | 1.802723  | -4.733108 | 0.321198  |
| 19 | 8 | 0 | 4.020861  | 1.977631  | 0.792148  |
| 20 | 8 | 0 | 2.164518  | 3.741427  | 1.532331  |
| 21 | 6 | 0 | 1.218534  | 4.730953  | 1.918341  |
| 22 | 1 | 0 | -0.954435 | -1.265472 | -0.837220 |
| 23 | 1 | 0 | 0.849239  | -2.199963 | 1.419847  |
| 24 | 1 | 0 | 2.539613  | -2.484391 | -0.377213 |
| 25 | 1 | 0 | 1.242088  | -4.374376 | -1.575670 |
| 26 | 1 | 0 | -0.816237 | -5.205505 | -0.311856 |
| 27 | 1 | 0 | -1.951838 | 0.749201  | 0.311281  |
| 28 | 1 | 0 | -1.864677 | 0.724050  | 2.082135  |
| 29 | 1 | 0 | -0.385841 | 2.717014  | 1.677928  |
| 30 | 1 | 0 | 3.191861  | -0.426931 | 0.322003  |
| 31 | 1 | 0 | -2.810333 | -3.800484 | 1.465627  |
| 32 | 1 | 0 | -3.429735 | -3.501613 | -0.160951 |

|    |   |   |           |           |           |
|----|---|---|-----------|-----------|-----------|
| 33 | 1 | 0 | -3.434182 | -1.135949 | 0.118061  |
| 34 | 1 | 0 | -3.565015 | -1.532378 | 1.848538  |
| 35 | 1 | 0 | 1.805878  | -2.256711 | -2.522962 |
| 36 | 1 | 0 | 1.423351  | -4.648243 | 1.206920  |
| 37 | 1 | 0 | 4.052782  | 2.919176  | 1.020816  |
| 38 | 1 | 0 | 1.786181  | 5.651726  | 2.058022  |
| 39 | 1 | 0 | 0.463268  | 4.881229  | 1.137195  |
| 40 | 1 | 0 | 0.724603  | 4.459559  | 2.859410  |

-----

Cartesian coordinate of SSSS\_c12:

-----

| Center<br>Number | Atomic<br>Number | Atomic<br>Type | Coordinates (Angstroms) |           |           |
|------------------|------------------|----------------|-------------------------|-----------|-----------|
|                  |                  |                | X                       | Y         | Z         |
| -----            |                  |                |                         |           |           |
| 1                | 6                | 0              | 0.001642                | -2.398519 | 0.509219  |
| 2                | 6                | 0              | -1.292828               | -3.209799 | 0.193519  |
| 3                | 6                | 0              | -2.210983               | -2.577912 | -0.835953 |
| 4                | 6                | 0              | -2.023763               | -1.335328 | -1.295969 |
| 5                | 6                | 0              | -0.832246               | -0.525330 | -0.879982 |
| 6                | 7                | 0              | -1.308112               | 0.848064  | -0.926290 |
| 7                | 6                | 0              | -0.195847               | 1.781680  | -0.820168 |
| 8                | 6                | 0              | 0.781461                | 1.382452  | 0.284173  |
| 9                | 6                | 0              | 1.739393                | 2.331163  | 0.683231  |
| 10               | 6                | 0              | 2.690308                | 2.020311  | 1.648865  |
| 11               | 6                | 0              | 2.697905                | 0.740510  | 2.236155  |
| 12               | 6                | 0              | 1.751318                | -0.196933 | 1.848663  |
| 13               | 6                | 0              | 0.788057                | 0.104971  | 0.874077  |
| 14               | 6                | 0              | -0.300522               | -0.886431 | 0.493625  |
| 15               | 6                | 0              | -2.894372               | -0.431214 | -2.154720 |
| 16               | 6                | 0              | -2.132660               | 0.922716  | -2.137595 |
| 17               | 8                | 0              | 1.072758                | -2.778270 | -0.358386 |

|    |   |   |           |           |           |
|----|---|---|-----------|-----------|-----------|
| 18 | 8 | 0 | -2.039288 | -3.467093 | 1.398660  |
| 19 | 8 | 0 | 3.626919  | 0.419698  | 3.184883  |
| 20 | 8 | 0 | 3.672650  | 2.861804  | 2.119472  |
| 21 | 6 | 0 | 3.755387  | 4.176245  | 1.581927  |
| 22 | 1 | 0 | -0.018362 | -0.658833 | -1.633561 |
| 23 | 1 | 0 | -1.137729 | -0.739479 | 1.193881  |
| 24 | 1 | 0 | 0.323276  | -2.721206 | 1.502063  |
| 25 | 1 | 0 | -0.961381 | -4.200072 | -0.136889 |
| 26 | 1 | 0 | -3.088052 | -3.161648 | -1.111616 |
| 27 | 1 | 0 | 0.359341  | 1.831790  | -1.782362 |
| 28 | 1 | 0 | -0.586120 | 2.788648  | -0.628548 |
| 29 | 1 | 0 | 1.728563  | 3.315680  | 0.226218  |
| 30 | 1 | 0 | 1.785370  | -1.175326 | 2.315589  |
| 31 | 1 | 0 | -3.891535 | -0.331231 | -1.712566 |
| 32 | 1 | 0 | -3.025030 | -0.809041 | -3.174341 |
| 33 | 1 | 0 | -1.501054 | 1.013937  | -3.043526 |
| 34 | 1 | 0 | -2.797991 | 1.791101  | -2.105339 |
| 35 | 1 | 0 | 0.884199  | -2.487126 | -1.260243 |
| 36 | 1 | 0 | -2.591052 | -2.695138 | 1.586419  |
| 37 | 1 | 0 | 4.197748  | 1.191573  | 3.319630  |
| 38 | 1 | 0 | 4.593351  | 4.656248  | 2.088711  |
| 39 | 1 | 0 | 3.946997  | 4.149871  | 0.502219  |
| 40 | 1 | 0 | 2.836385  | 4.741864  | 1.778555  |

-----



## 6. VCD spectrum of compounds **2** and **3**

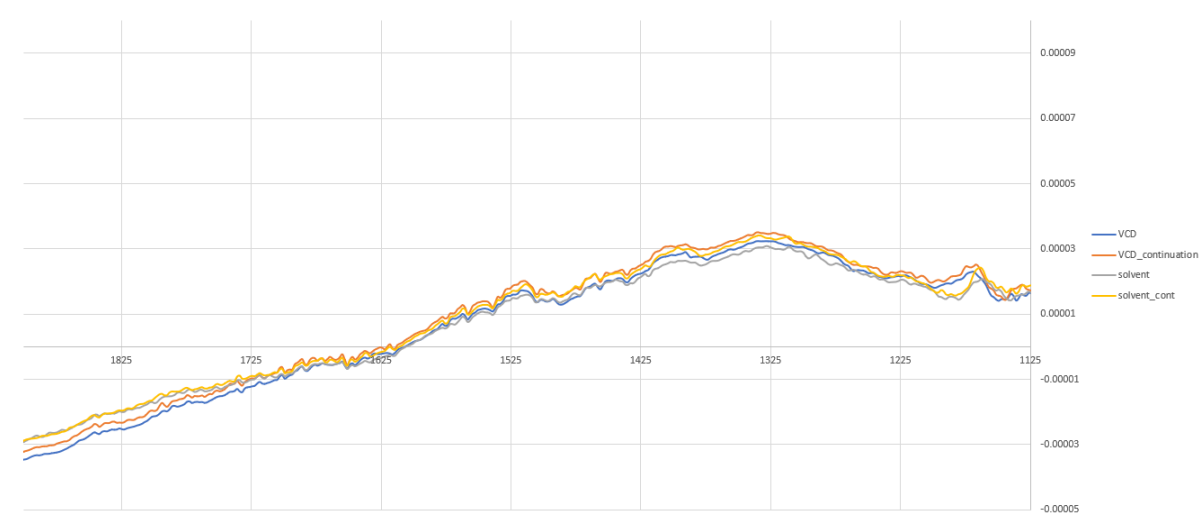

Figure S23. VCD spectrum of compounds **2** and **3** in  $(\text{CD}_3)_2\text{SO}$  without any observed signals

## 6. Anti-SARS-CoV-2 activity and cytotoxicity

| Compound       |   | IC <sub>50</sub> (μM) |   | CC <sub>50</sub> (μM) | SI | av. IC <sub>50</sub> (μM) | SD    | av. CC <sub>50</sub> (μM) | SD   | SI |
|----------------|---|-----------------------|---|-----------------------|----|---------------------------|-------|---------------------------|------|----|
| <b>1</b>       | = | 54.035                | > | 100                   | >2 | 45.80                     | 11.65 | >100,00                   |      | >2 |
|                | = | 37.559                | > | 100                   | >3 |                           |       |                           |      |    |
| <b>2 and 3</b> | > | 100                   | > | 100                   | X1 | >100,00                   |       | >100,00                   |      | X1 |
|                | > | 100                   | > | 100                   | X1 |                           |       |                           |      |    |
| <b>4 and 5</b> | = | 44.608                | > | 100                   | >2 | 44.95                     | 0.48  | >100,00                   |      | >2 |
|                | = | 45.287                | > | 100                   | >2 |                           |       |                           |      |    |
| <b>6</b>       | > | 100                   | = | 1.2768                | <1 | >100,00                   |       | 1.21                      | 0.10 | <1 |
|                | > | 100                   | = | 1.1424                | <1 |                           |       |                           |      |    |
| <b>7</b>       | = | 69.265                | > | 100                   | >1 | 54.24                     | 21.24 | >100,00                   |      | >2 |
|                | = | 39.223                | > | 100                   | >3 |                           |       |                           |      |    |
| <b>8</b>       | = | 37.104                | > | 100                   | >3 | 39.63                     | 3.58  | >100,00                   |      | >3 |
|                | = | 42.161                | > | 100                   | >2 |                           |       |                           |      |    |
| <b>9</b>       | > | 100                   | > | 100                   | X1 | >100,00                   |       | >100,00                   |      | X1 |
|                | > | 100                   | > | 100                   | X1 |                           |       |                           |      |    |
| <b>10</b>      | > | 100                   | = | 0.14                  | <1 | >100,00                   |       | 0.13                      | 0.01 | <1 |
|                | > | 100                   | = | 0.1223                | <1 |                           |       |                           |      |    |
| <b>11</b>      | = | 99.446                | > | 100                   | >1 | 77.17                     | 31.51 | >100,00                   |      | >1 |
|                | = | 54.887                | > | 100                   | >2 |                           |       |                           |      |    |
